# Supplementary material
Source: PubMed Central journal article supplement (PMC8428802)

## *Supporting Information*

### **Discovery of Potent and Brain-Penetrant GPR52 Agonist that Suppresses Psychostimulant Behavior**

Pingyuan Wang,<sup>†,§</sup> Daniel E. Felsing,<sup>‡,§</sup> Haiying Chen,<sup>†</sup> Sonja J. Stutz,<sup>‡</sup> Ryan E. Murphy,<sup>‡</sup>

Kathryn A. Cunningham,<sup>†,‡</sup> John A. Allen,<sup>\*,†,‡</sup> and Jia Zhou<sup>\*,†,‡</sup>

<sup>†</sup>Chemical Biology Program, Department of Pharmacology and Toxicology, <sup>‡</sup>Center for  
Addiction Research, University of Texas Medical Branch, Galveston, TX 77555, USA

<sup>§</sup>P.W. and D.E.F contributed equally and should be considered as co-first authors.

***\*Corresponding authors:***

Dr. Jia Zhou, phone: +1 (409) 772-9748; e-mail: [jizhou@utmb.edu](mailto:jizhou@utmb.edu).

Dr. John A. Allen: phone, (409) 772-9621; fax: 409-747-7050; e-mail: [joaallen@utmb.edu](mailto:joaallen@utmb.edu)

\*J.Z. and J.A.A are equal contributors and corresponding authors

## Table of Contents

|                                                                                                       |         |
|-------------------------------------------------------------------------------------------------------|---------|
| Figure S1                                                                                             | S3      |
| Figure S2                                                                                             | S4      |
| Copies of representative HPLC analysis                                                                | S5-S15  |
| Copies of $^1\text{H}$ and $^{13}\text{C}$ NMR spectra and representative $^{19}\text{F}$ NMR spectra | S16-S54 |

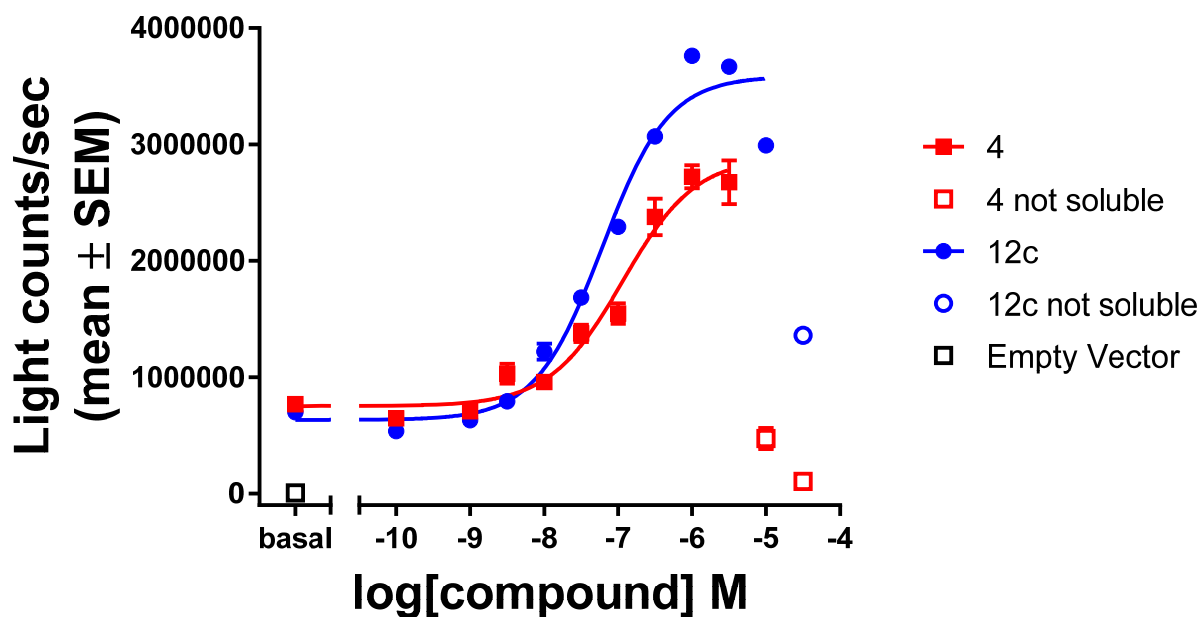

**Figure S1.** Representative concentration-responses of compound **4** and **12c** on cAMP signaling in HEK293 cells transiently expressing GPR52 and cAMP Glosensor reporter. Transient expression of GPR52 resulted in >100 fold light counts/sec over empty vector, indicating high constitutive receptor activity. Compound **4** (positive control) yields a robust ~3-fold increase in light counts/sec over basal values. Compounds were tested in twelve-point concentration-responses (0.1 nM – 30  $\mu$ M); however, due to poor water solubility of compound **4**, 10 and 30  $\mu$ M points were excluded for the potency and efficacy analysis. Similarly, if a severe drop in light counts was observed at high concentration points (i.e. 30  $\mu$ M for compound **12c**), these points were excluded for curve fitting analyses.

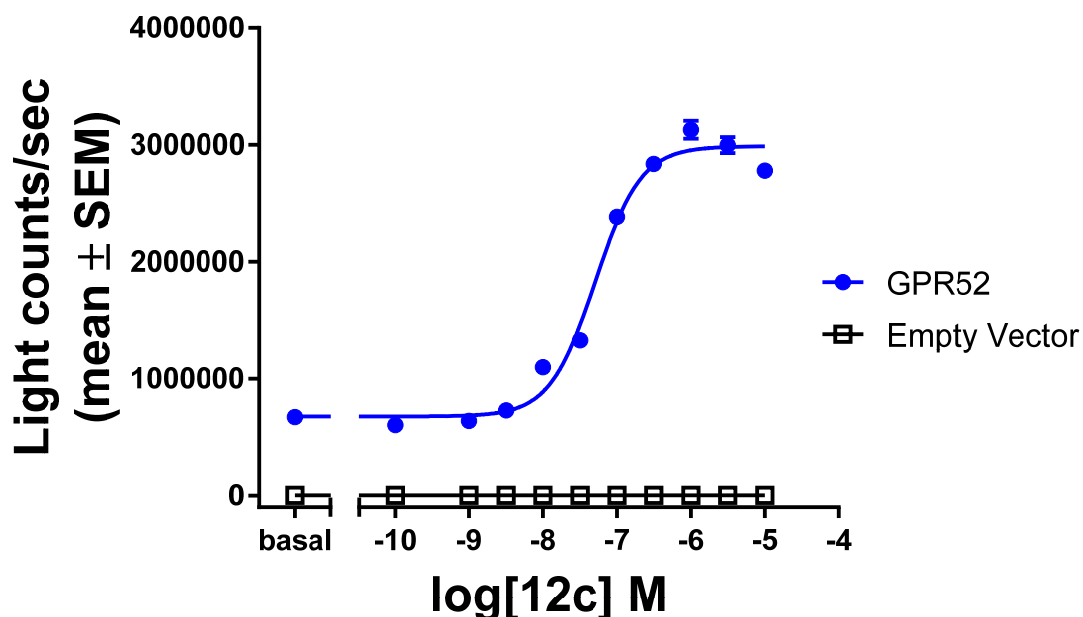

**Figure S2.** Representative concentration-responses of compound **12c** on cAMP signaling in HEK293 cells transiently expressing GPR52 or an empty vector (control) and cAMP Glosensor reporter. Compound **12c** was tested in twelve-point concentration-responses (0.1 nM – 10  $\mu$ M). Compound **12c** yields a robust ~3-fold increase in light counts/sec over basal values in cells expressing GPR52 (blue circles). Importantly, no increase in cAMP was observed in cells expressing empty vector (black squares), indicating that compound **12c** elevation of cAMP is due to selectively activating GPR52.

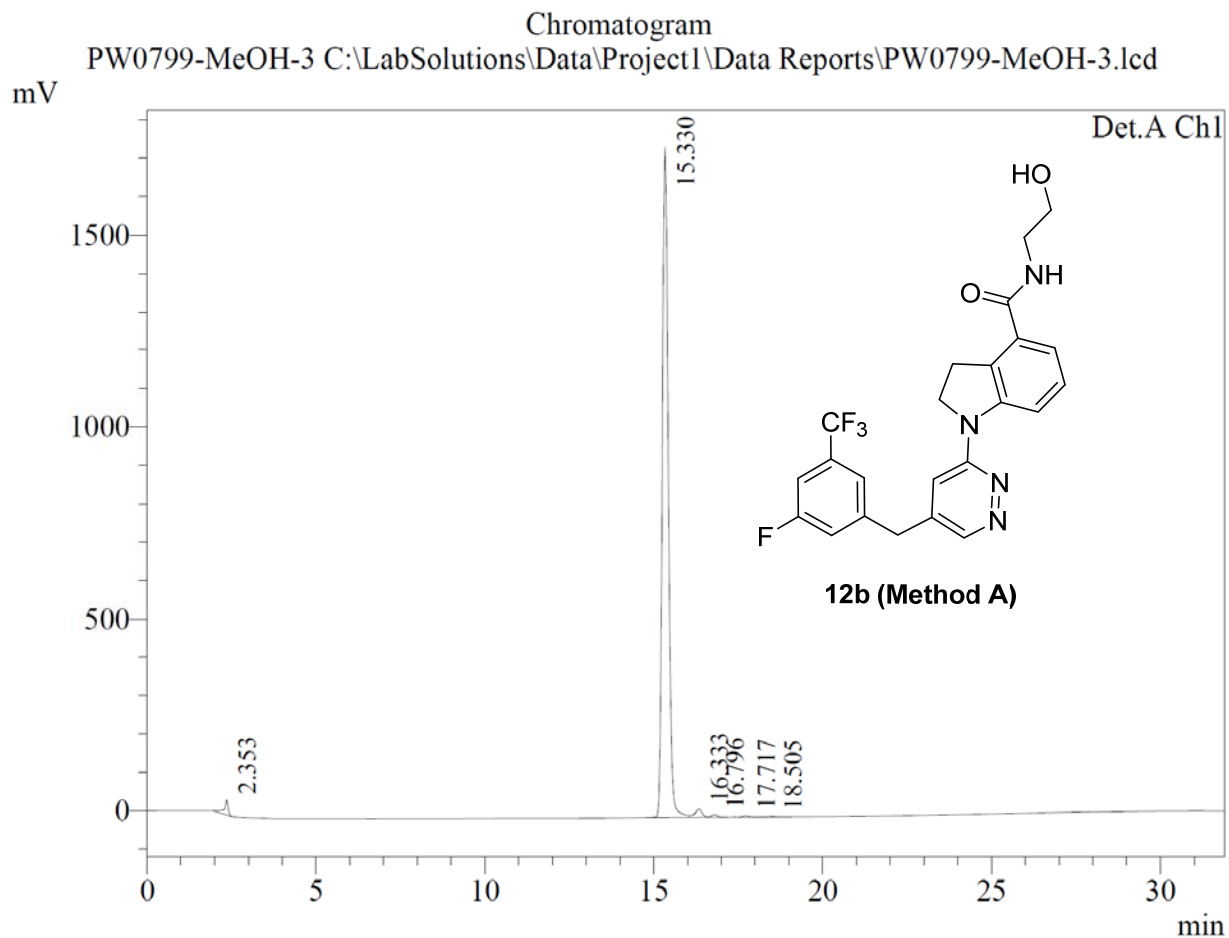

PeakTable

Detector A Ch1 254nm

| Peak# | Ret. Time | Area     | Area %  | Height % |
|-------|-----------|----------|---------|----------|
| 1     | 2.353     | 323543   | 1.448   | 2.122    |
| 2     | 15.330    | 21537858 | 96.392  | 96.000   |
| 3     | 16.333    | 324207   | 1.451   | 1.206    |
| 4     | 16.796    | 85734    | 0.384   | 0.383    |
| 5     | 17.717    | 49741    | 0.223   | 0.211    |
| 6     | 18.505    | 22852    | 0.102   | 0.079    |
| Total |           | 22343935 | 100.000 | 100.000  |

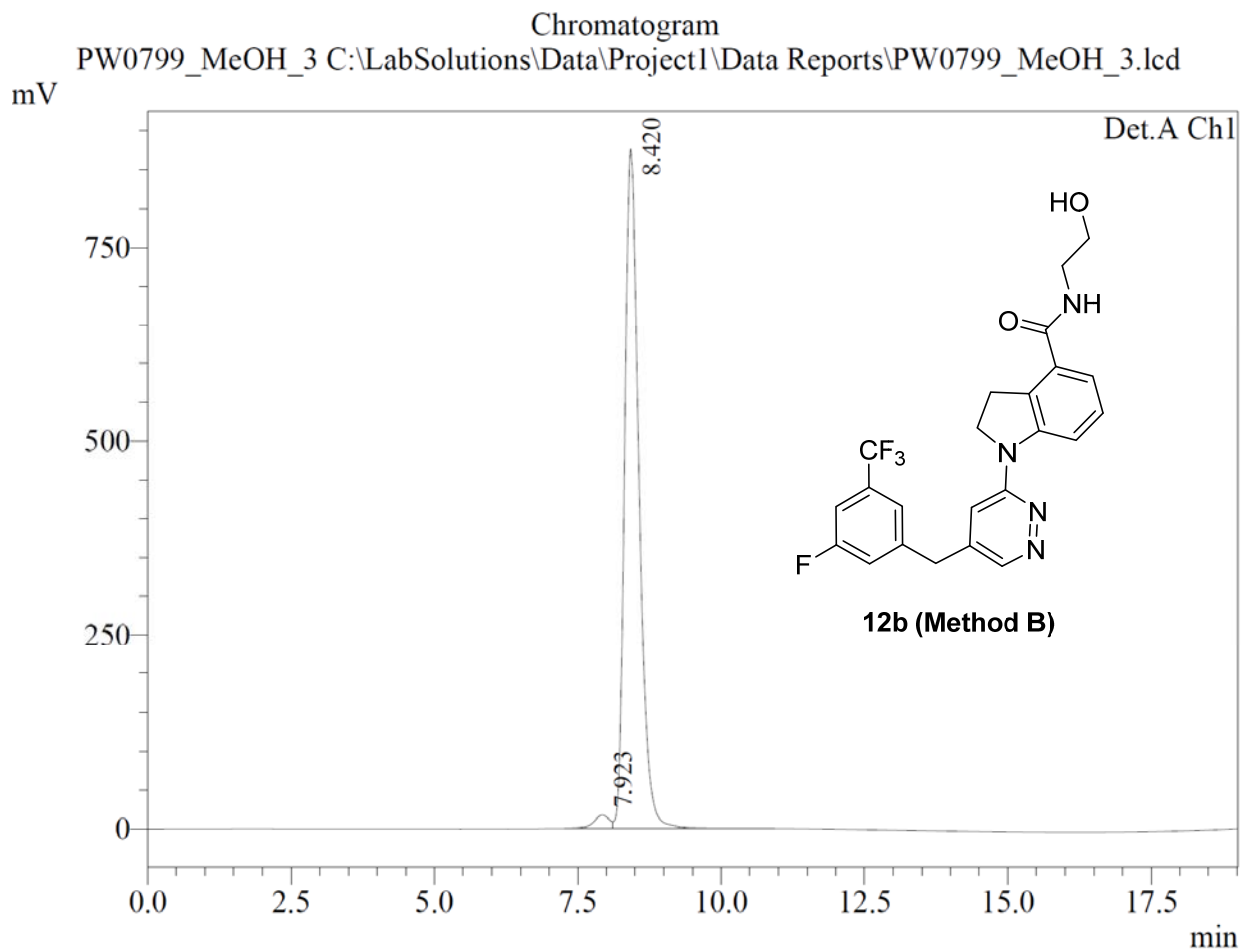

PeakTable

Detector A Ch1 254nm

| Peak# | Ret. Time | Area     | Area %  | Height % |
|-------|-----------|----------|---------|----------|
| 1     | 7.923     | 311553   | 2.002   | 1.934    |
| 2     | 8.420     | 15247990 | 97.998  | 98.066   |
| Total |           | 15559543 | 100.000 | 100.000  |

Chromatogram  
 PW0787 C:\LabSolutions\Data\Project1\Data Reports\PW0787\_1.lcd

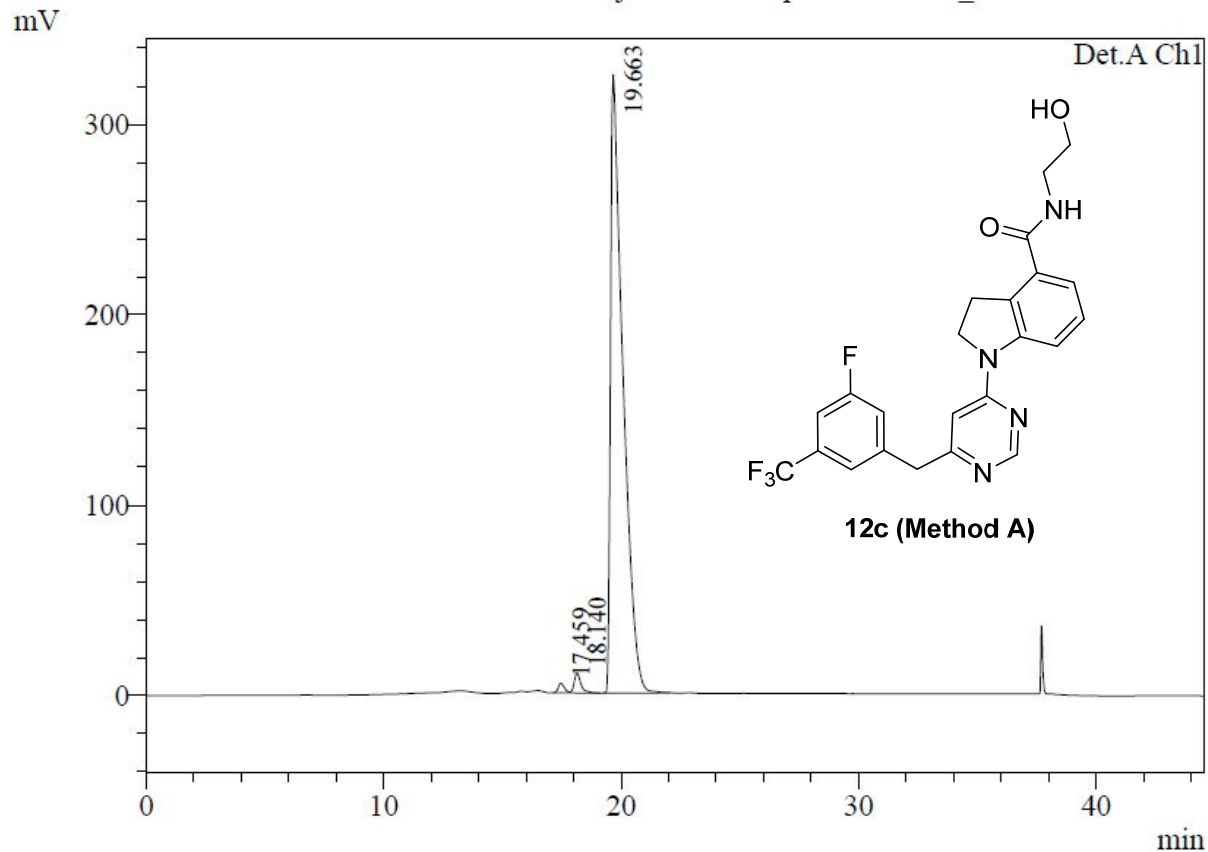

PeakTable

Detector A Ch1 254nm

| Peak# | Ret. Time | Area     | Area %  | Height % |
|-------|-----------|----------|---------|----------|
| 1     | 17.459    | 89681    | 0.741   | 1.477    |
| 2     | 18.140    | 205021   | 1.695   | 3.089    |
| 3     | 19.663    | 11804114 | 97.564  | 95.434   |
| Total |           | 12098816 | 100.000 | 100.000  |

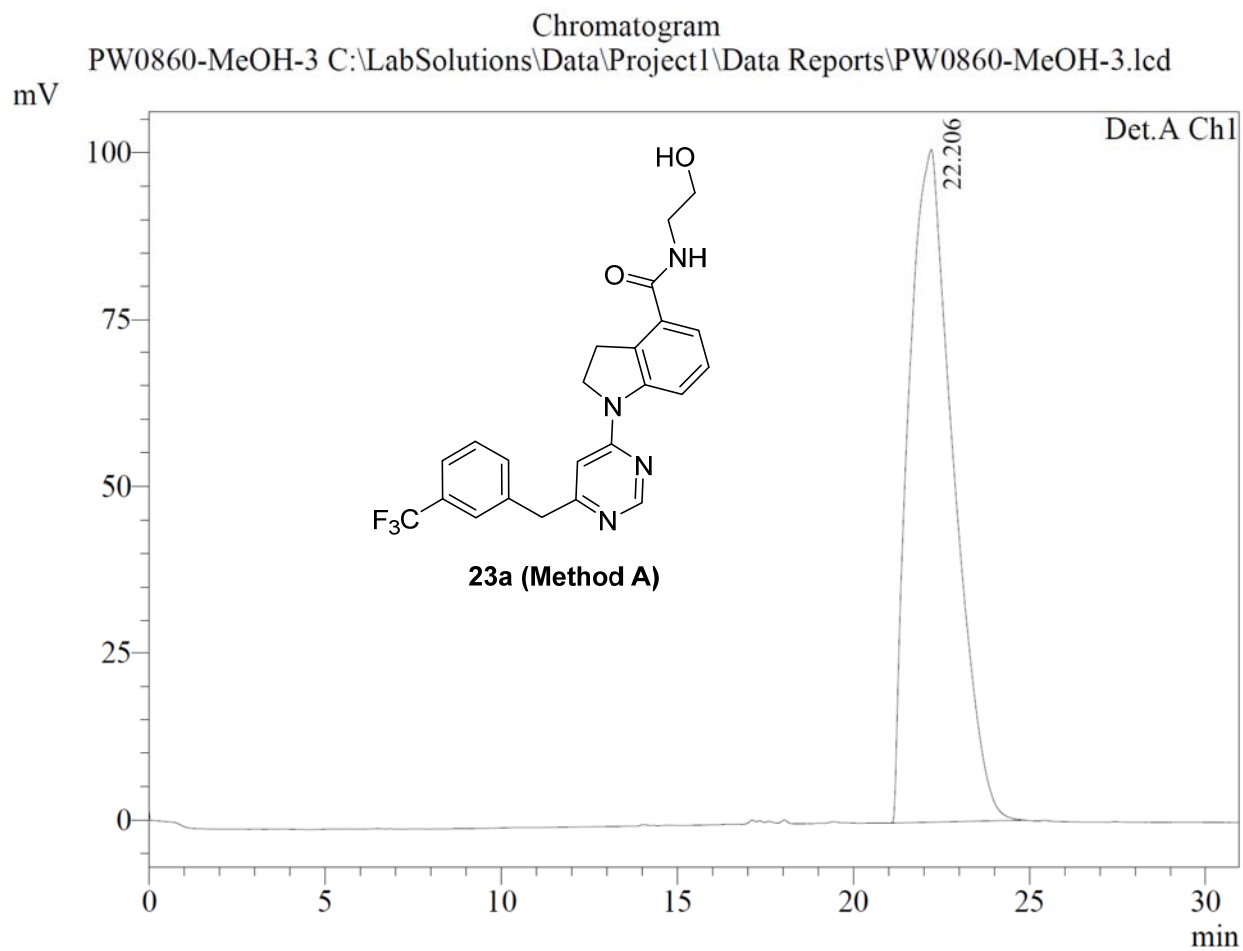

PeakTable

Detector A Ch1 254nm

| Peak# | Ret. Time | Area    | Area %  | Height % |
|-------|-----------|---------|---------|----------|
| 1     | 22.206    | 8839268 | 100.000 | 100.000  |
| Total |           | 8839268 | 100.000 | 100.000  |



Chromatogram

PW0860\_MeOH\_3 C:\LabSolutions\Data\Project1\Data Reports\PW0860\_MeOH\_3.lcd

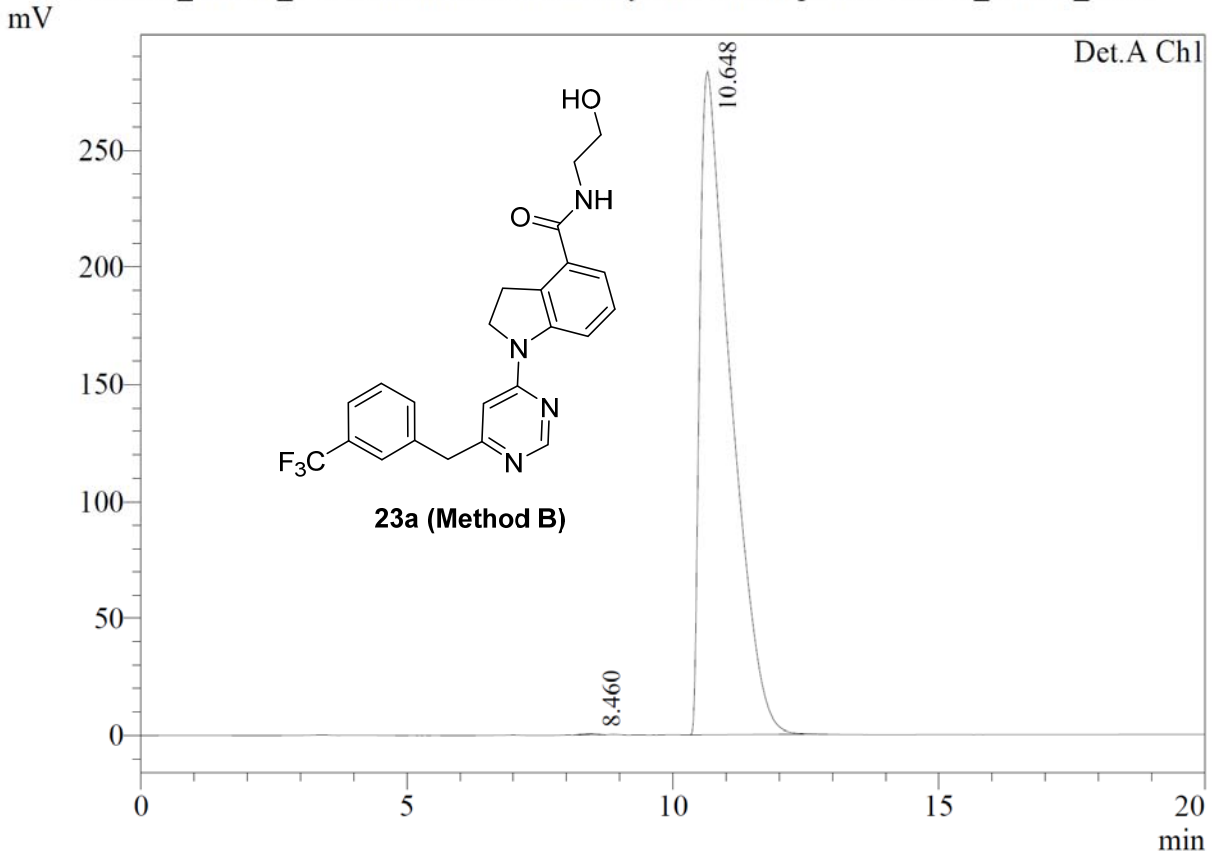

PeakTable

Detector A Ch1 254nm

| Peak# | Ret. Time | Area     | Area %  | Height % |
|-------|-----------|----------|---------|----------|
| 1     | 8.460     | 11540    | 0.101   | 0.204    |
| 2     | 10.648    | 11409889 | 99.899  | 99.796   |
| Total |           | 11421429 | 100.000 | 100.000  |

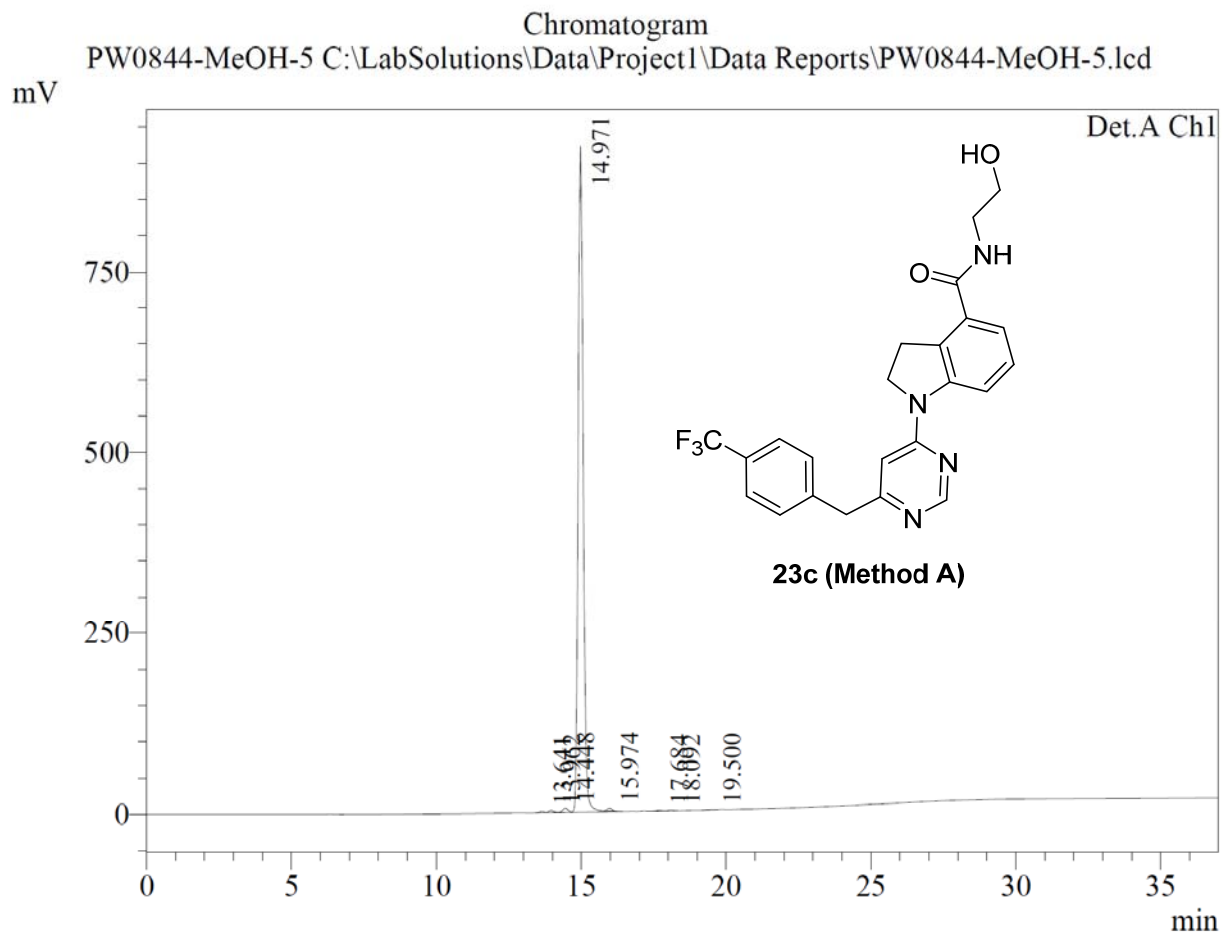

PeakTable

Detector A Ch1 254nm

| Peak# | Ret. Time | Area     | Area %  | Height % |
|-------|-----------|----------|---------|----------|
| 1     | 13.641    | 19235    | 0.170   | 0.184    |
| 2     | 13.962    | 35710    | 0.315   | 0.311    |
| 3     | 14.448    | 74149    | 0.654   | 0.634    |
| 4     | 14.971    | 11136556 | 98.187  | 98.218   |
| 5     | 15.974    | 43812    | 0.386   | 0.419    |
| 6     | 17.684    | 11297    | 0.100   | 0.086    |
| 7     | 18.092    | 10944    | 0.096   | 0.098    |
| 8     | 19.500    | 10510    | 0.093   | 0.048    |
| Total |           | 11342214 | 100.000 | 100.000  |

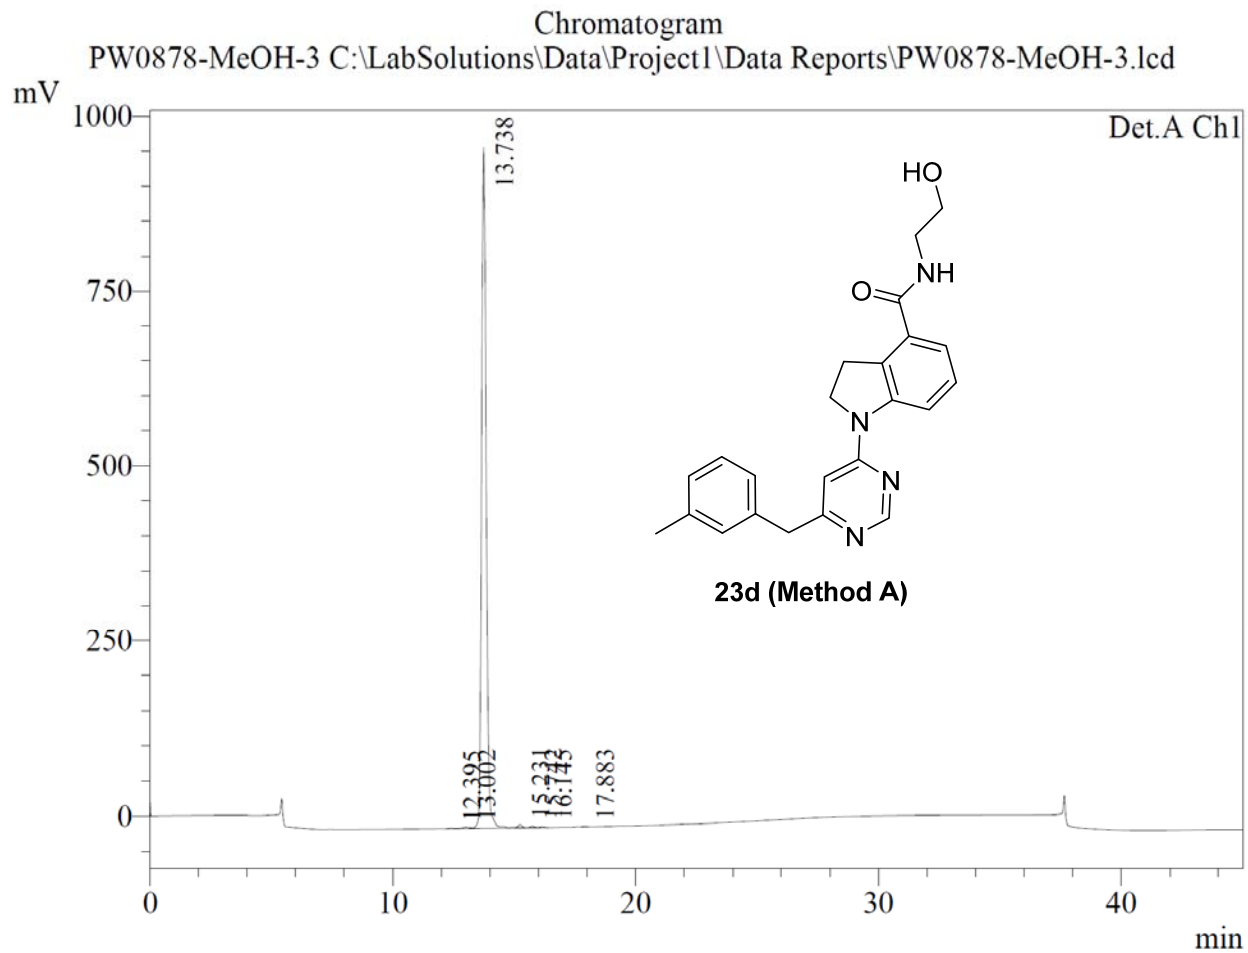

PeakTable

Detector A Ch1 254nm

| Peak# | Ret. Time | Area     | Area %  | Height % |
|-------|-----------|----------|---------|----------|
| 1     | 12.395    | 12734    | 0.097   | 0.098    |
| 2     | 13.002    | 47562    | 0.364   | 0.217    |
| 3     | 13.738    | 12902679 | 98.776  | 98.791   |
| 4     | 15.231    | 49171    | 0.376   | 0.443    |
| 5     | 15.742    | 25549    | 0.196   | 0.224    |
| 6     | 16.145    | 14588    | 0.112   | 0.130    |
| 7     | 17.883    | 10326    | 0.079   | 0.098    |
| Total |           | 13062608 | 100.000 | 100.000  |

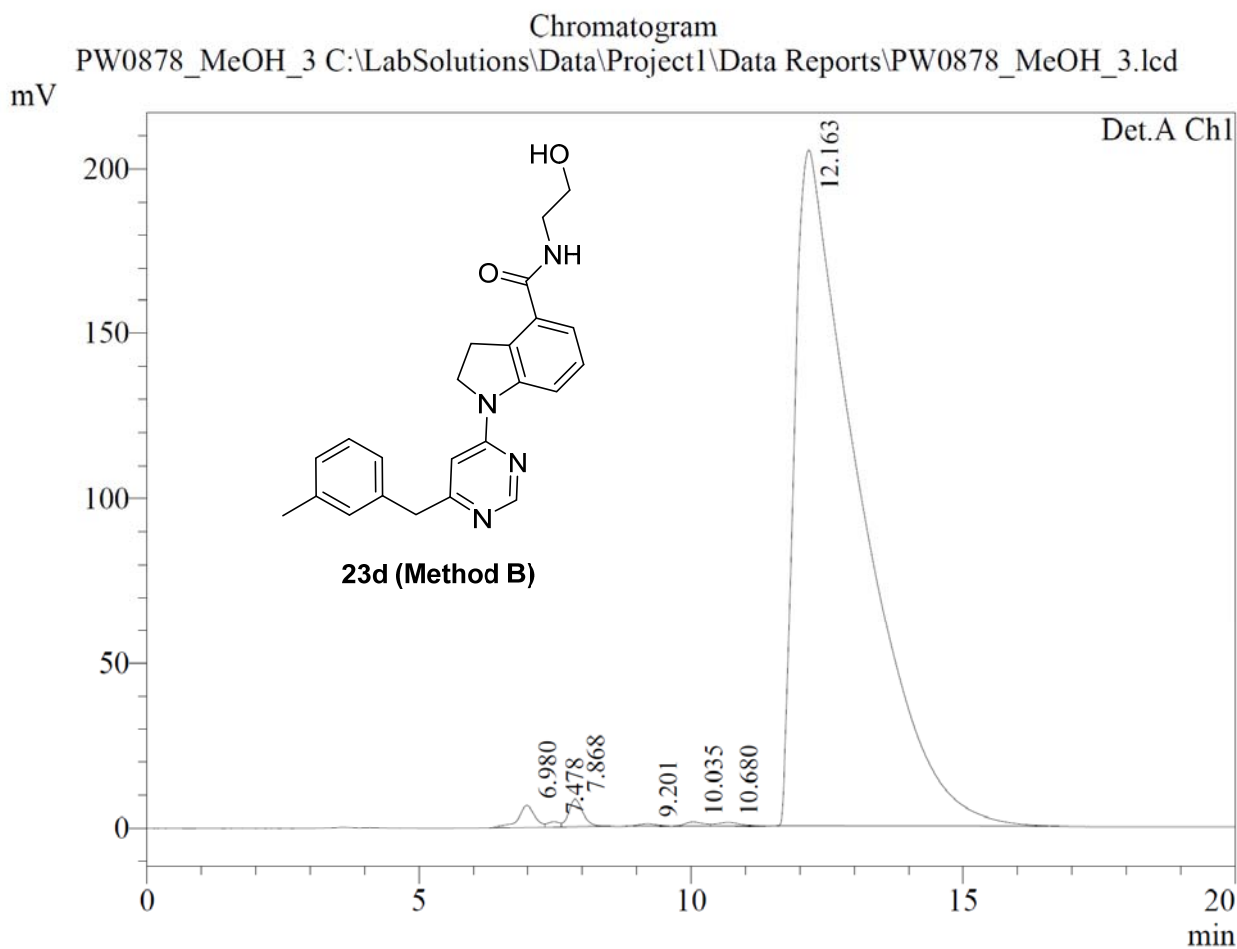

PeakTable

Detector A Ch1 254nm

| Peak# | Ret. Time | Area     | Area %  | Height % |
|-------|-----------|----------|---------|----------|
| 1     | 6.980     | 136911   | 0.789   | 2.944    |
| 2     | 7.478     | 23233    | 0.134   | 0.695    |
| 3     | 7.868     | 148134   | 0.854   | 3.707    |
| 4     | 9.201     | 12271    | 0.071   | 0.283    |
| 5     | 10.035    | 28209    | 0.163   | 0.562    |
| 6     | 10.680    | 31861    | 0.184   | 0.505    |
| 7     | 12.163    | 16970935 | 97.806  | 91.304   |
| Total |           | 17351553 | 100.000 | 100.000  |

Chromatogram  
 PW888 C:\LabSolutions\Data\Project1\Data Reports\PW888.lcd

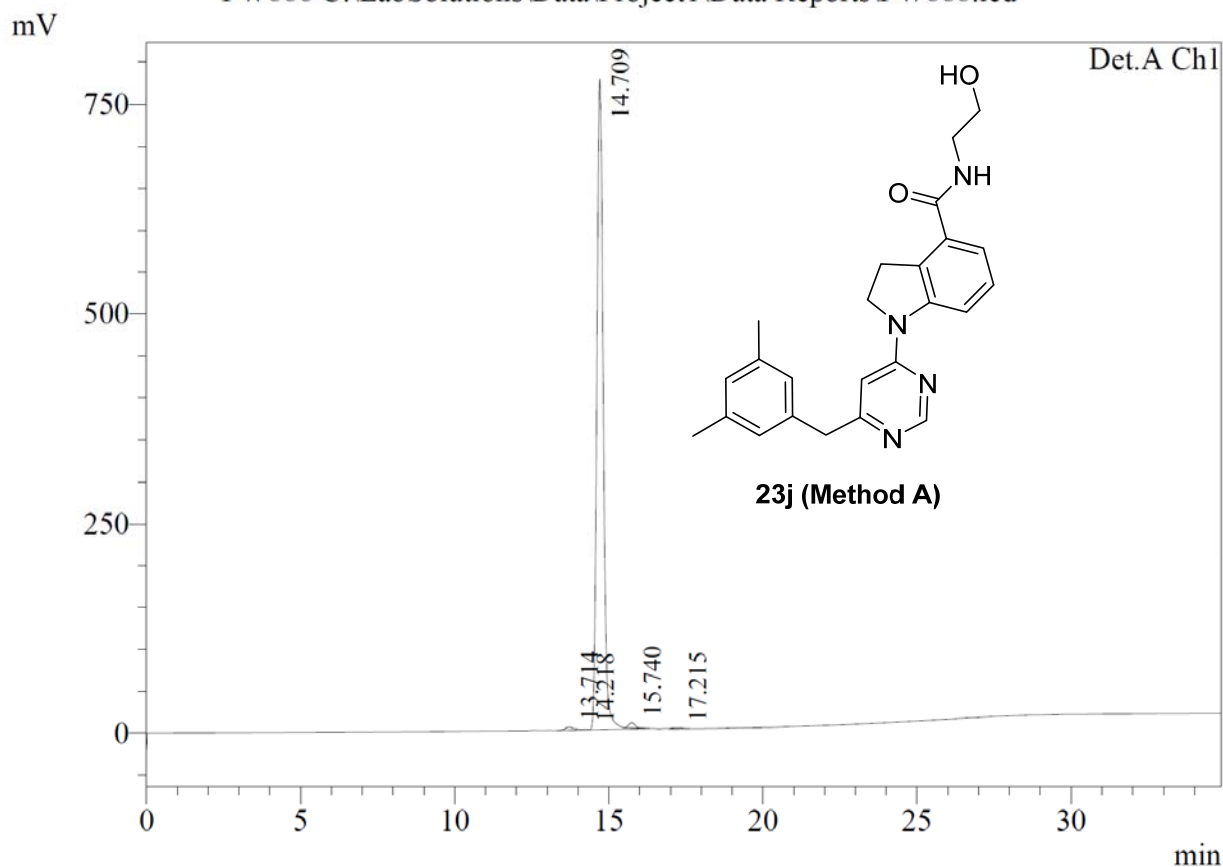

PeakTable

Detector A Chl 254nm

| Peak# | Ret. Time | Area     | Area %  | Height % |
|-------|-----------|----------|---------|----------|
| 1     | 13.714    | 80765    | 0.715   | 0.486    |
| 2     | 14.218    | 10170    | 0.090   | 0.108    |
| 3     | 14.709    | 11097346 | 98.247  | 98.477   |
| 4     | 15.740    | 81619    | 0.723   | 0.783    |
| 5     | 17.215    | 25408    | 0.225   | 0.146    |
| Total |           | 11295308 | 100.000 | 100.000  |

Chromatogram  
 PW889 C:\LabSolutions\Data\Project1\Data Reports\PW889.lcd

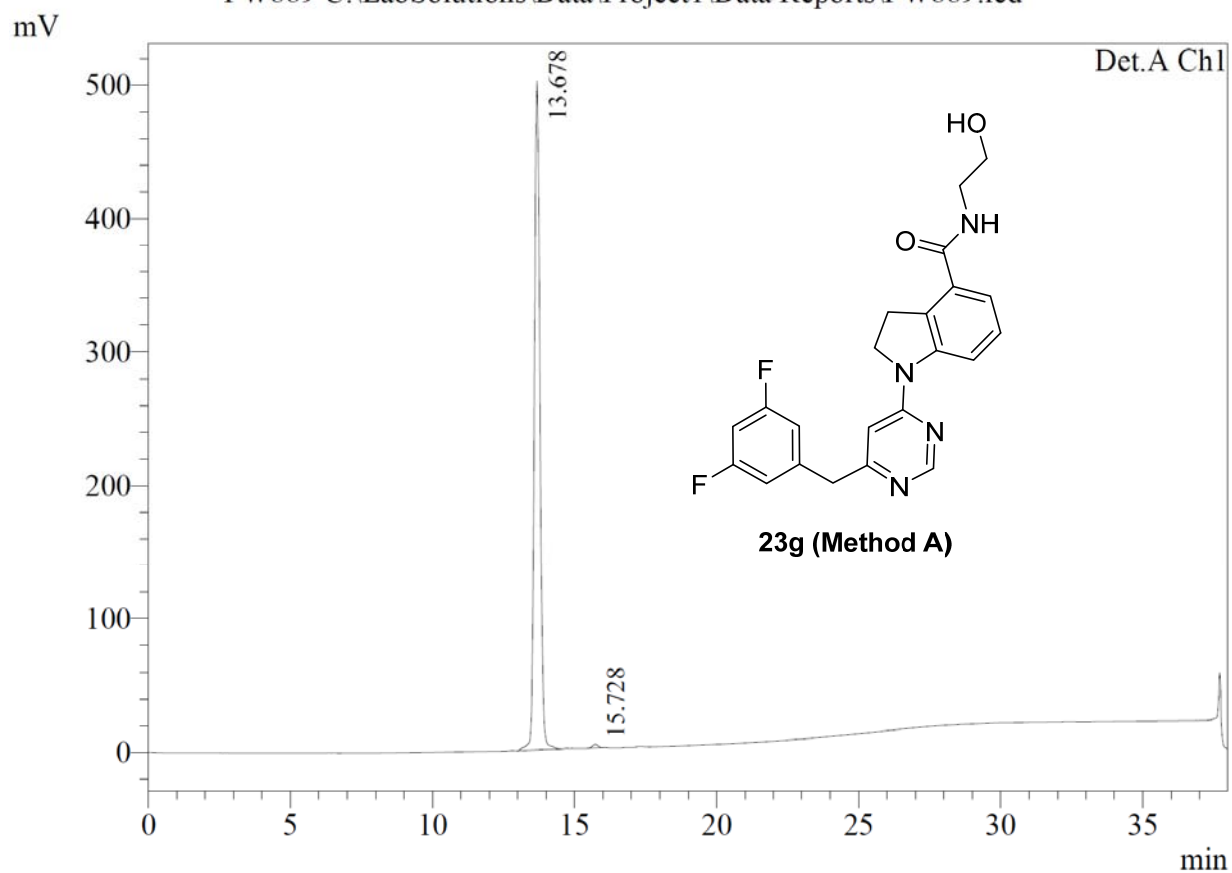

PeakTable

Detector A Ch1 254nm

| Peak# | Ret. Time | Area    | Area %  | Height % |
|-------|-----------|---------|---------|----------|
| 1     | 13.678    | 6878546 | 99.478  | 99.452   |
| 2     | 15.728    | 36118   | 0.522   | 0.548    |
| Total |           | 6914664 | 100.000 | 100.000  |

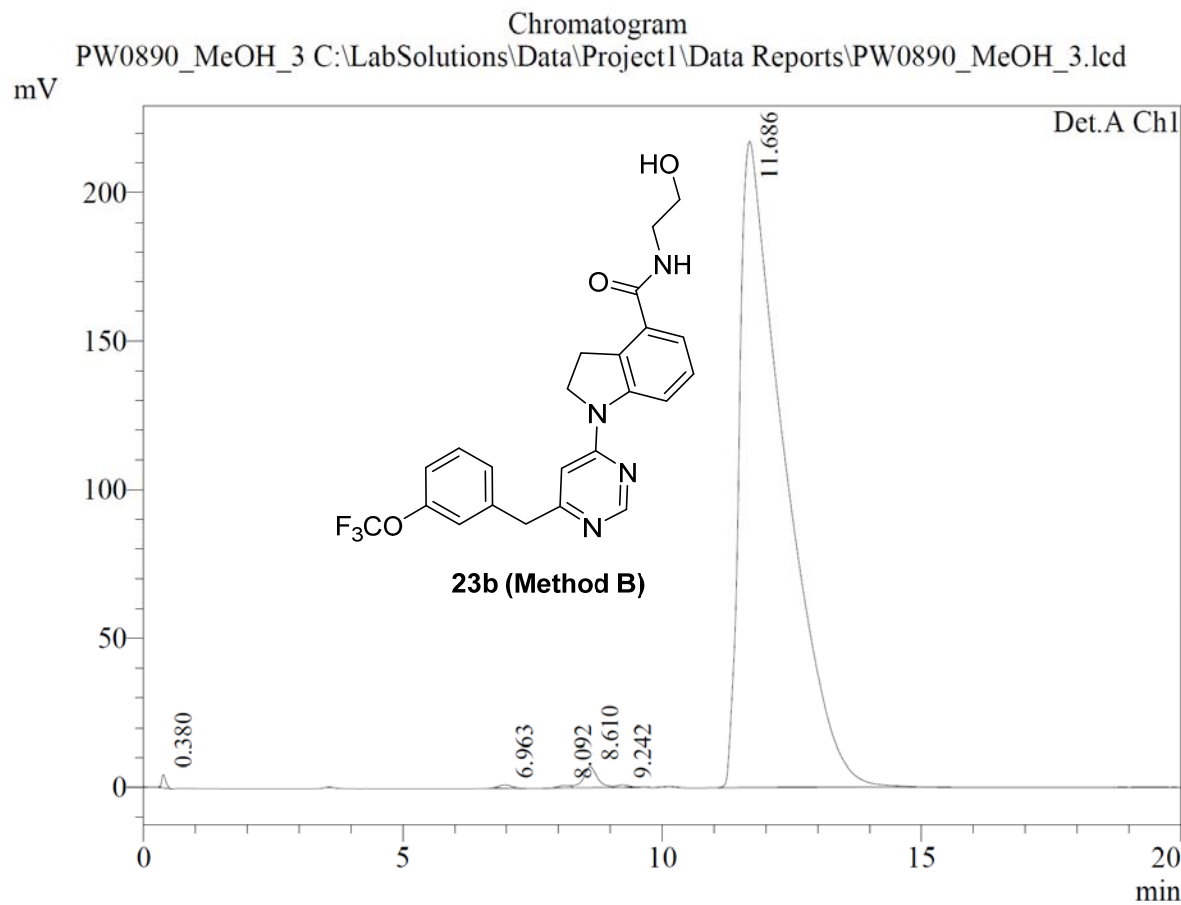

PeakTable

Detector A Ch1 254nm

| Peak# | Ret. Time | Area     | Area %  | Height % |
|-------|-----------|----------|---------|----------|
| 1     | 0.380     | 22939    | 0.172   | 1.925    |
| 2     | 6.963     | 16339    | 0.123   | 0.429    |
| 3     | 8.092     | 10505    | 0.079   | 0.297    |
| 4     | 8.610     | 127794   | 0.959   | 3.043    |
| 5     | 9.242     | 12748    | 0.096   | 0.351    |
| 6     | 11.686    | 13130053 | 98.571  | 93.954   |
| Total |           | 13320377 | 100.000 | 100.000  |

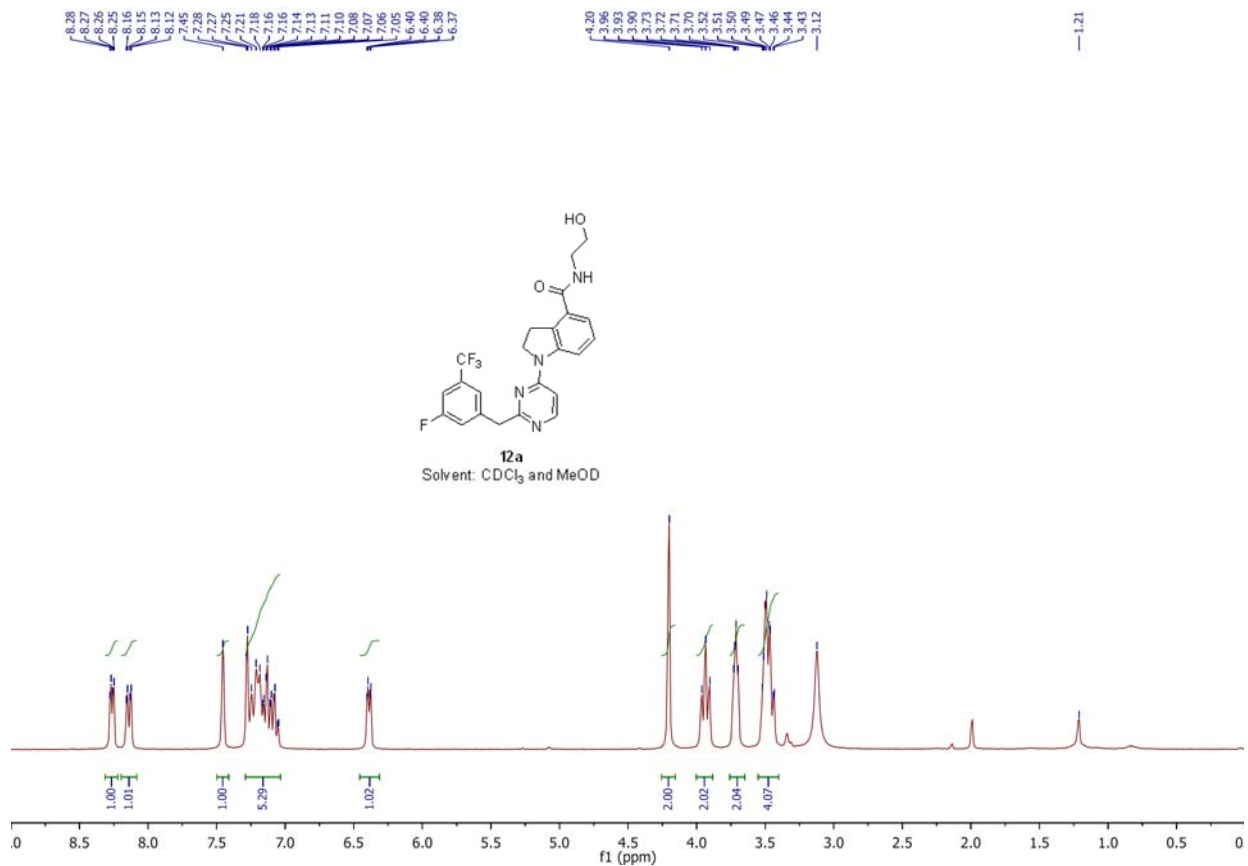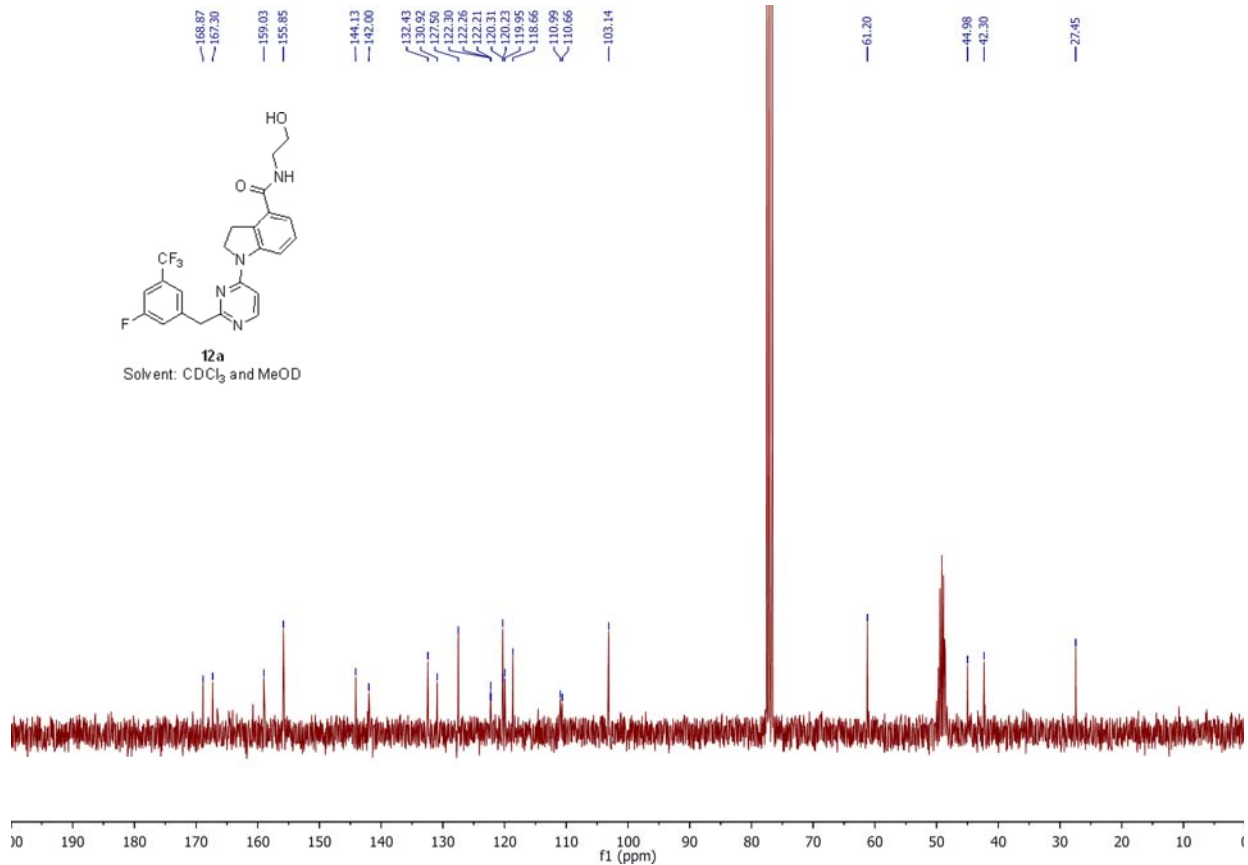



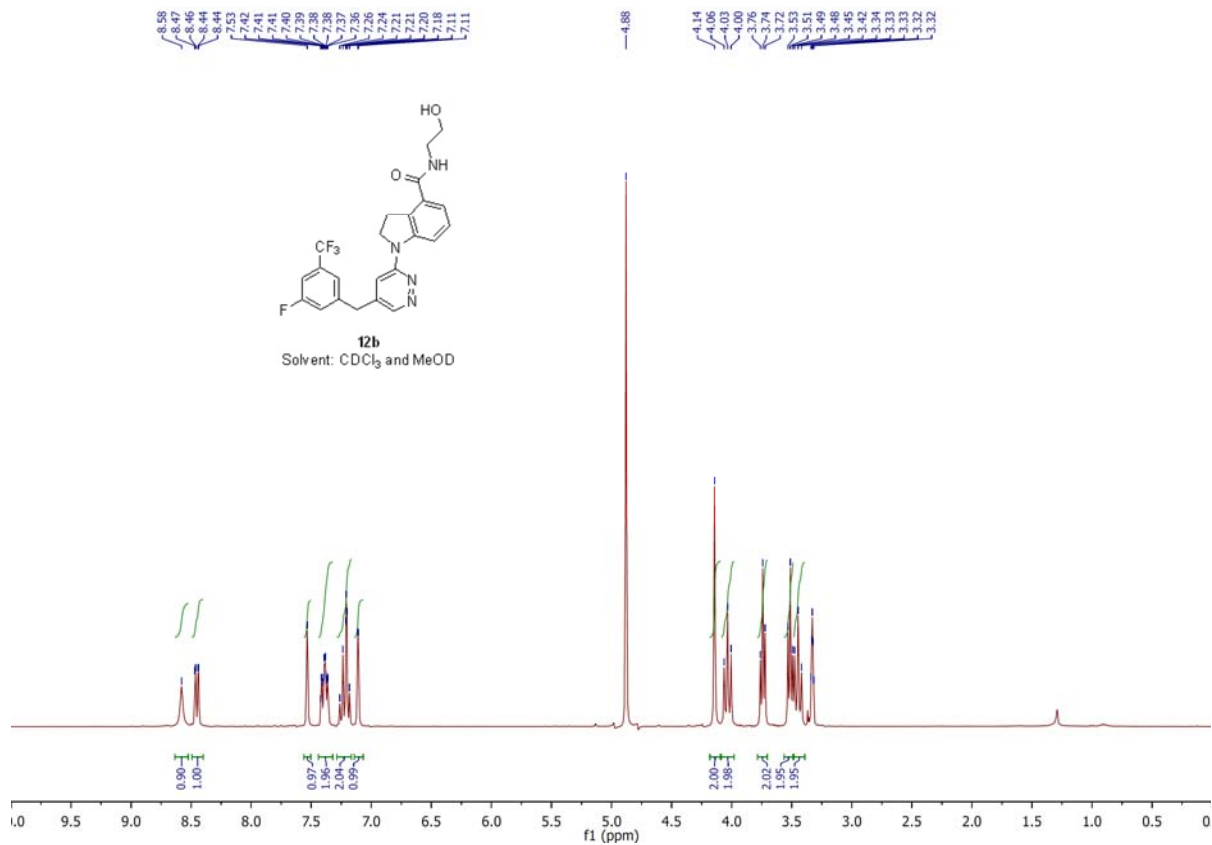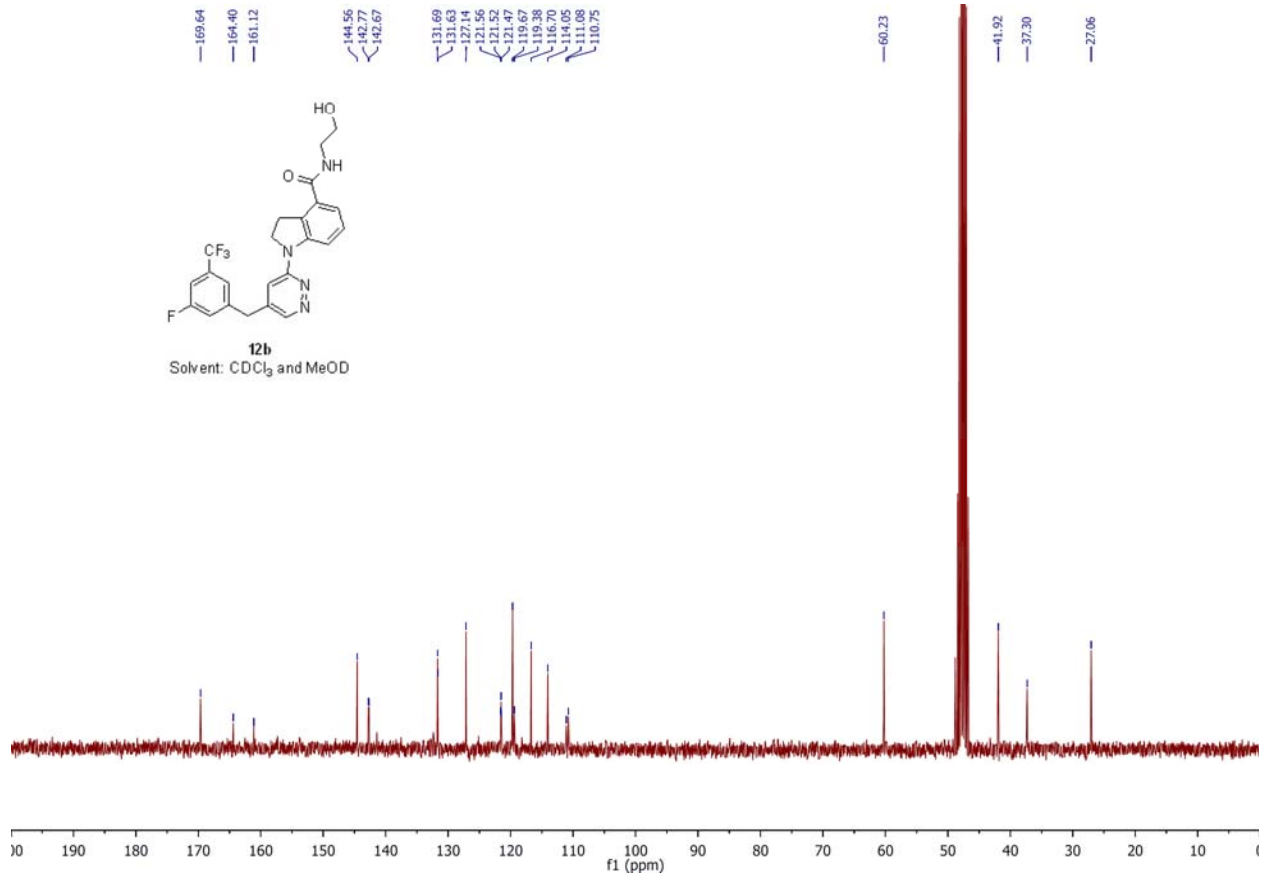

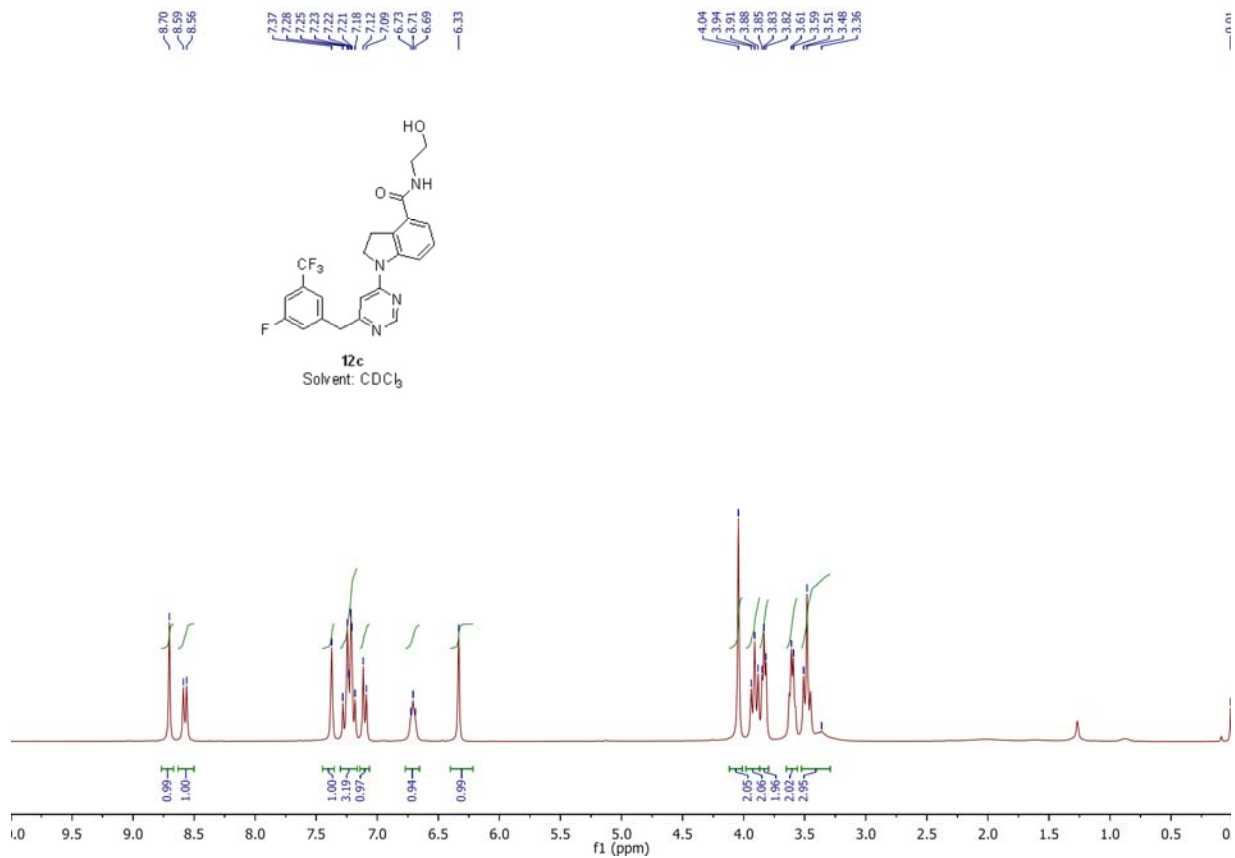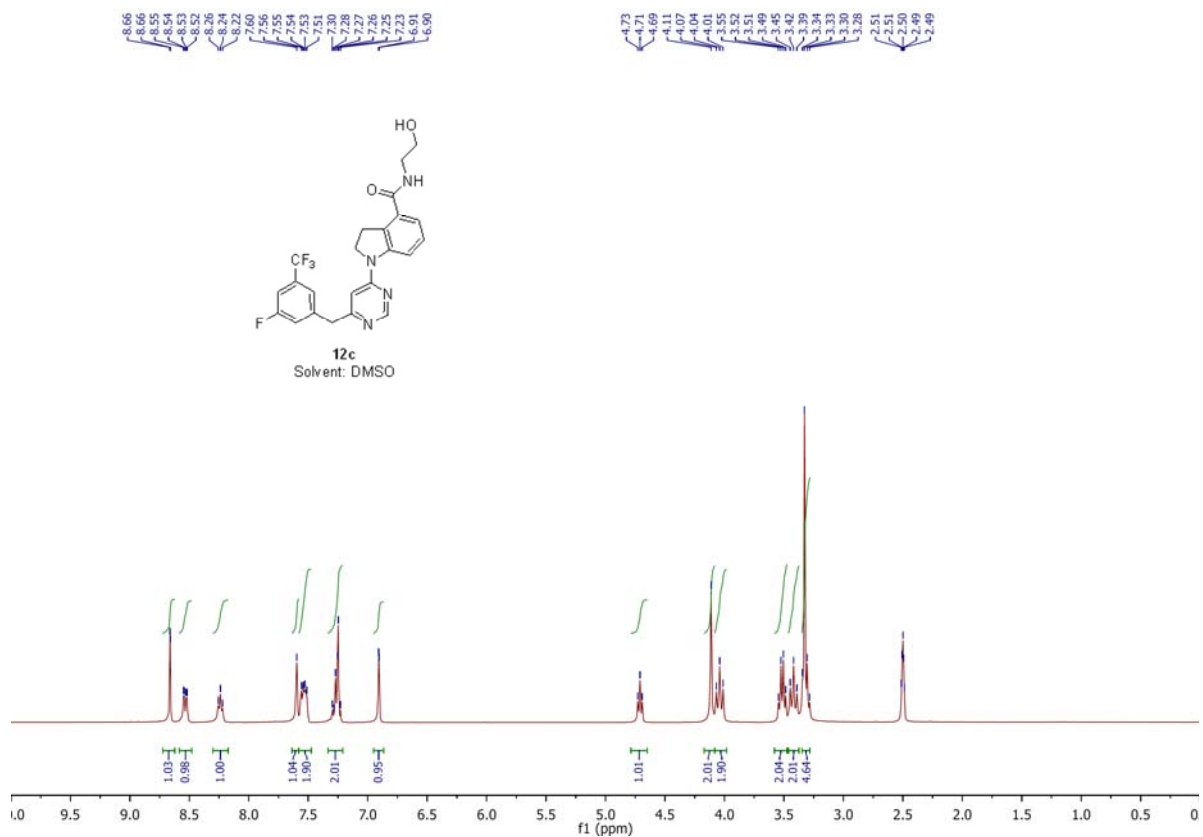

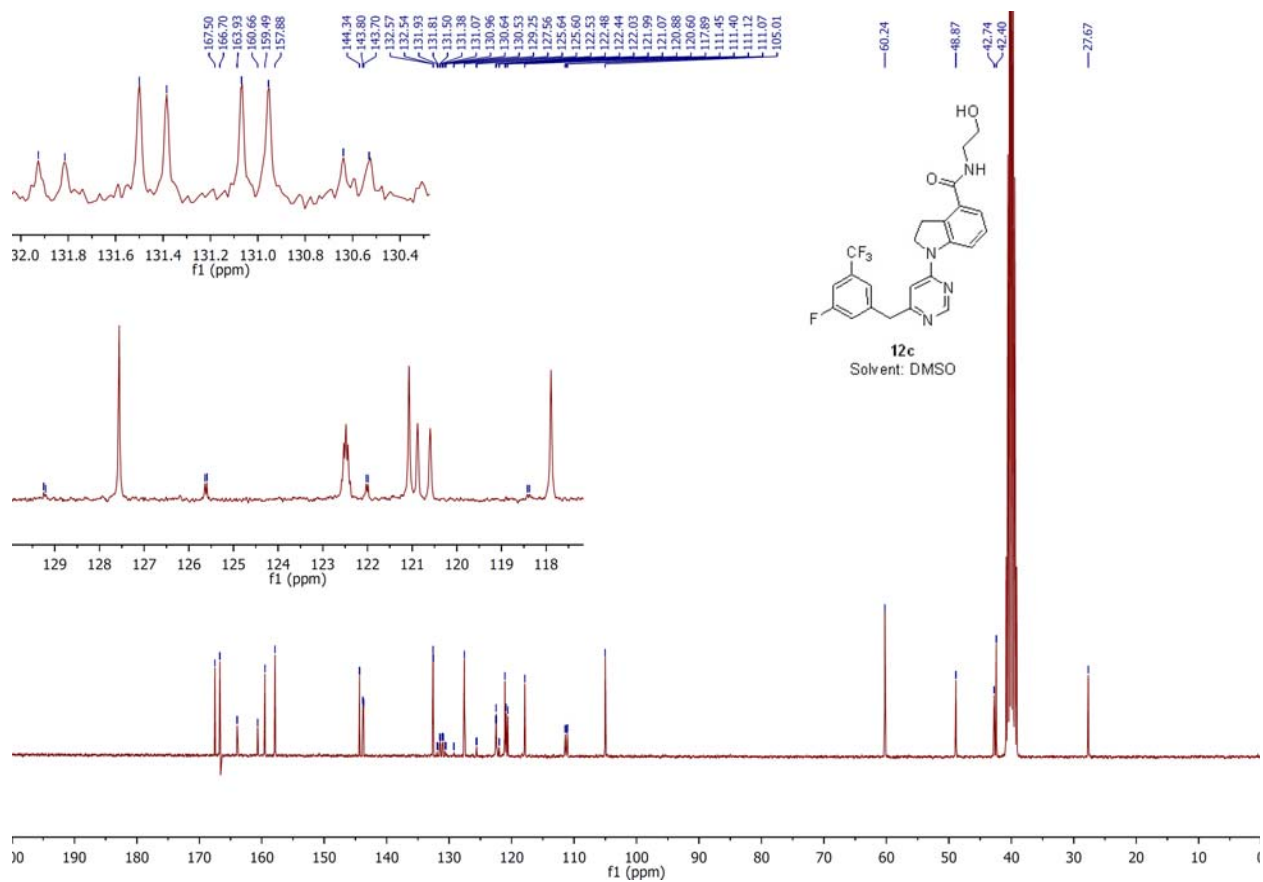

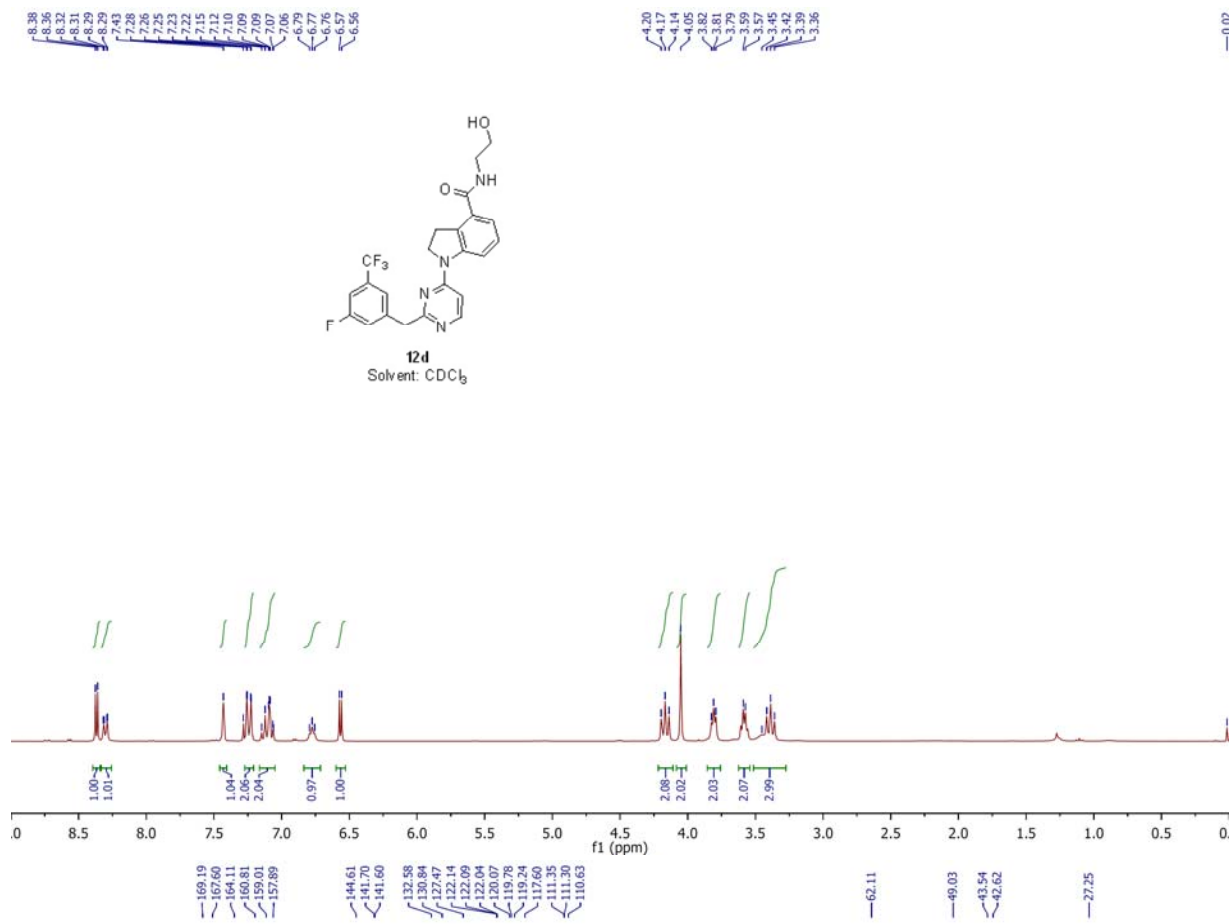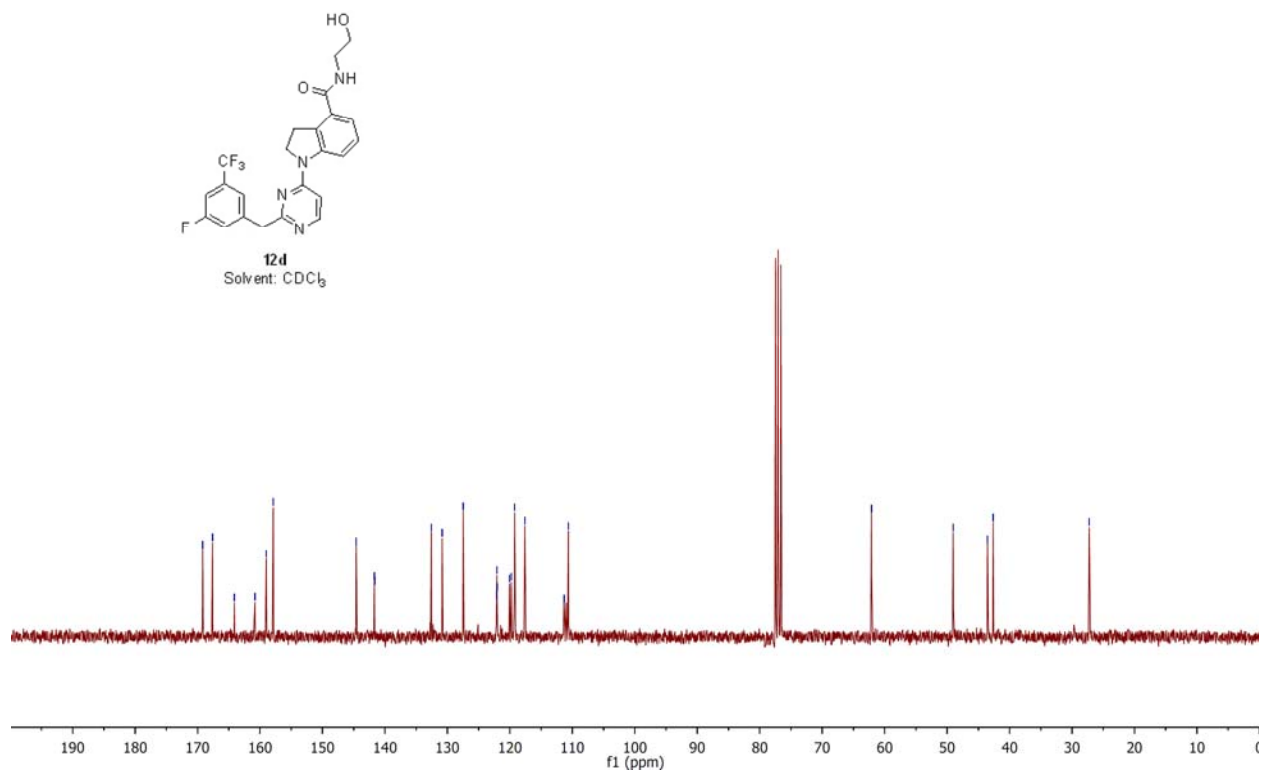

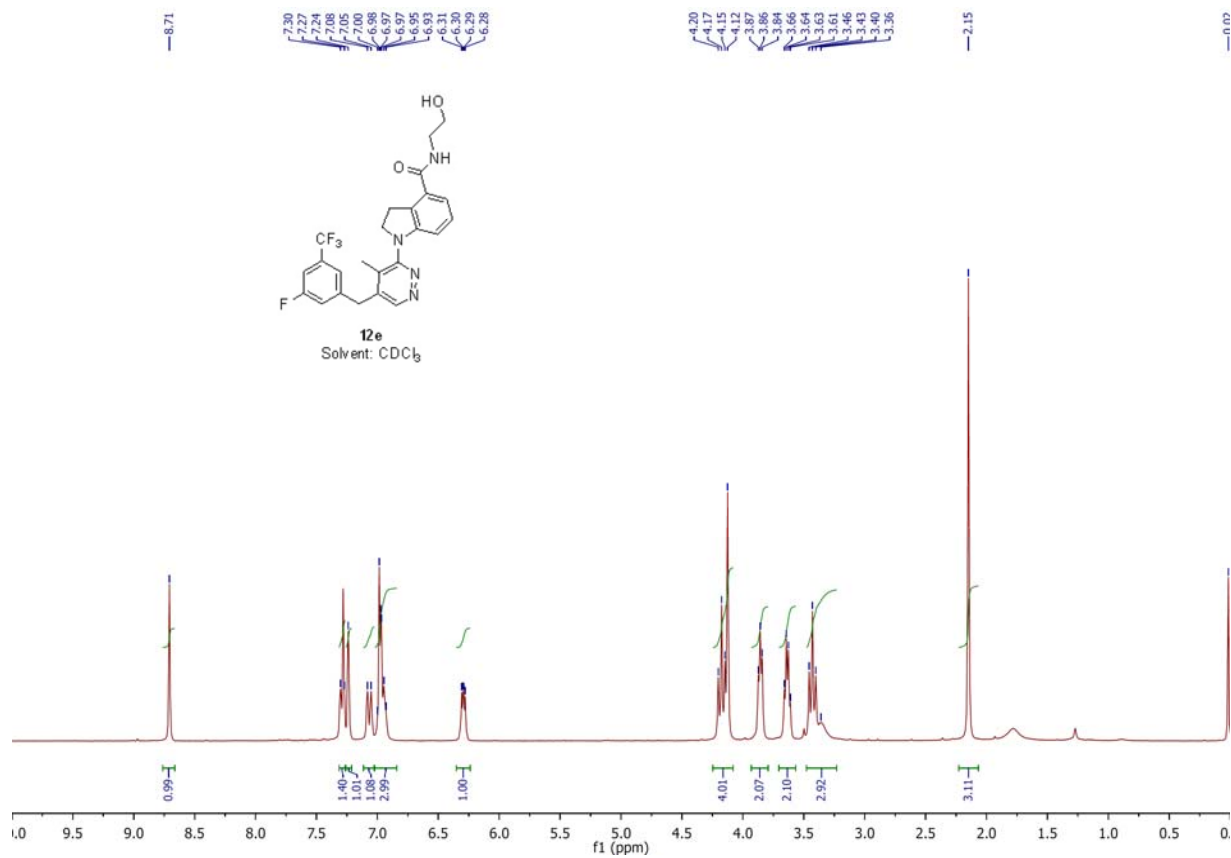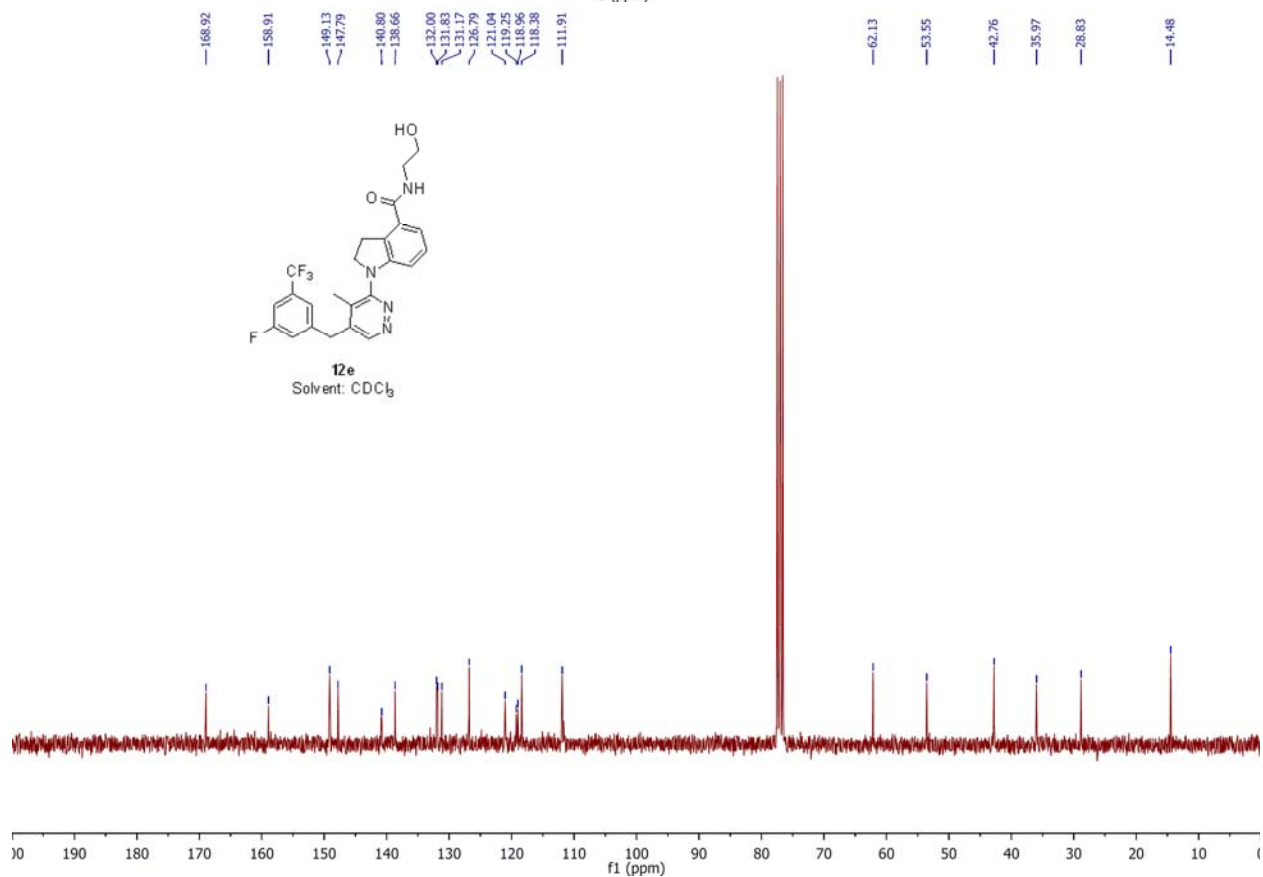

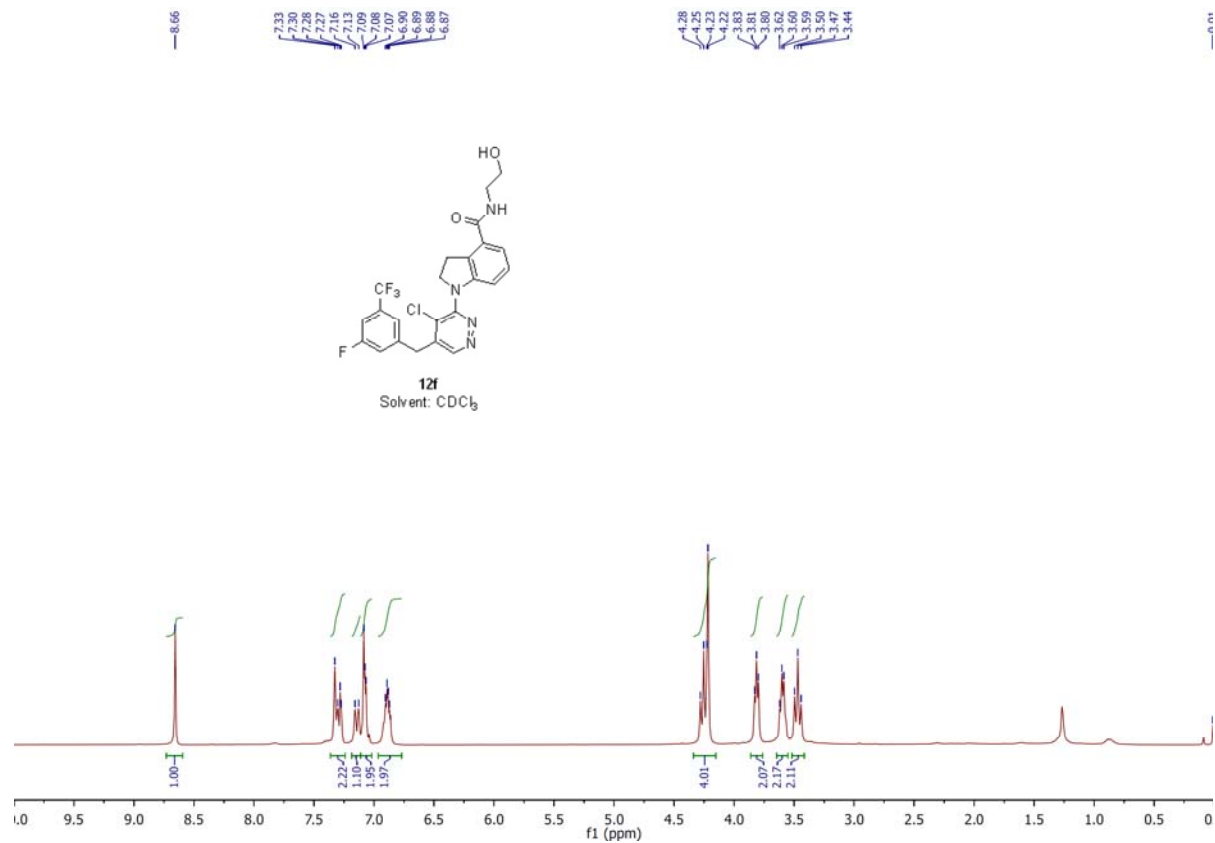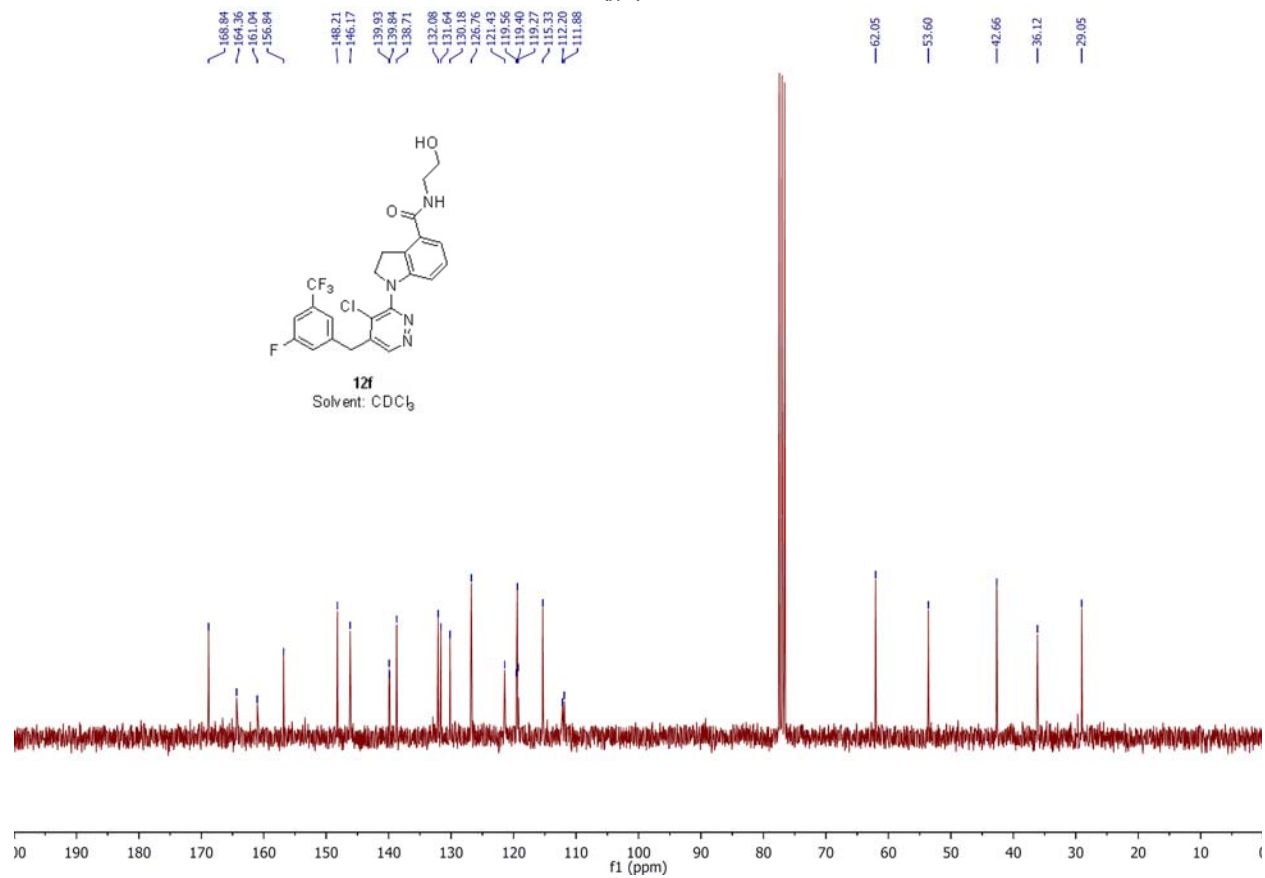

8.62  
8.48  
8.47

7.49  
7.46  
7.46  
7.43  
7.43  
7.39  
7.39  
7.21  
7.18  
7.16  
7.15  
7.14  
7.12  
7.12

6.32

4.01  
3.90  
3.87  
3.84  
3.71  
3.70  
3.68  
3.46  
3.45  
3.42  
3.39

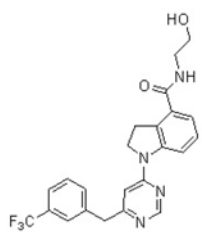

**23a**  
Solvent: CDCl<sub>3</sub> and MeOD

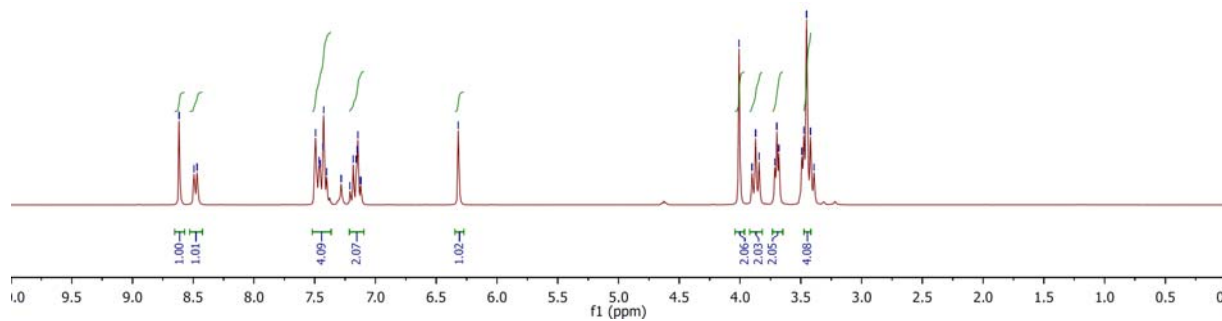

168.82  
166.74

159.40  
157.45

144.22

138.61  
132.51  
132.37  
131.01  
129.15  
127.66  
125.67  
123.75  
120.95  
120.33  
118.57

103.93

77.53  
77.08  
76.67

61.08

49.57  
49.29  
49.01  
48.69  
48.49  
48.17

27.42

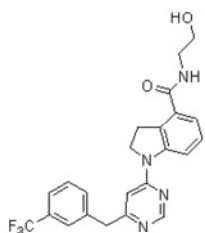

**23a**  
Solvent: CDCl<sub>3</sub> and MeOD

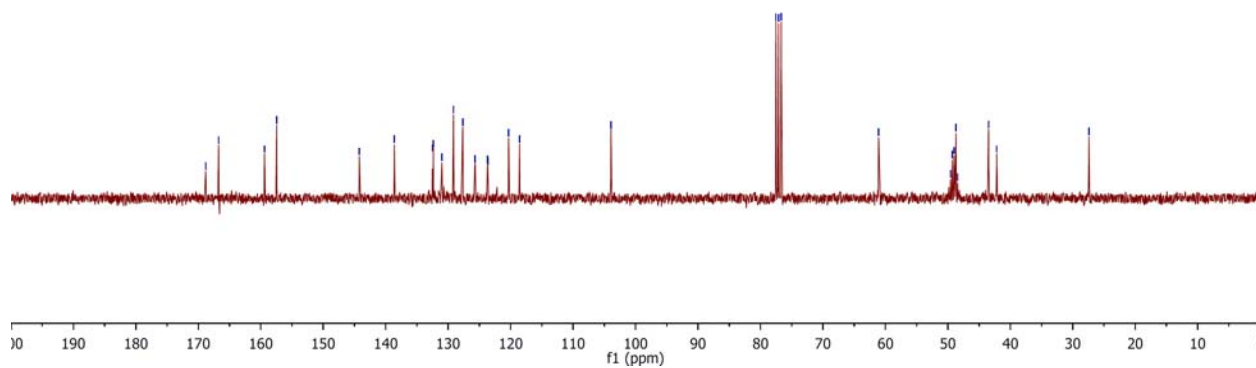

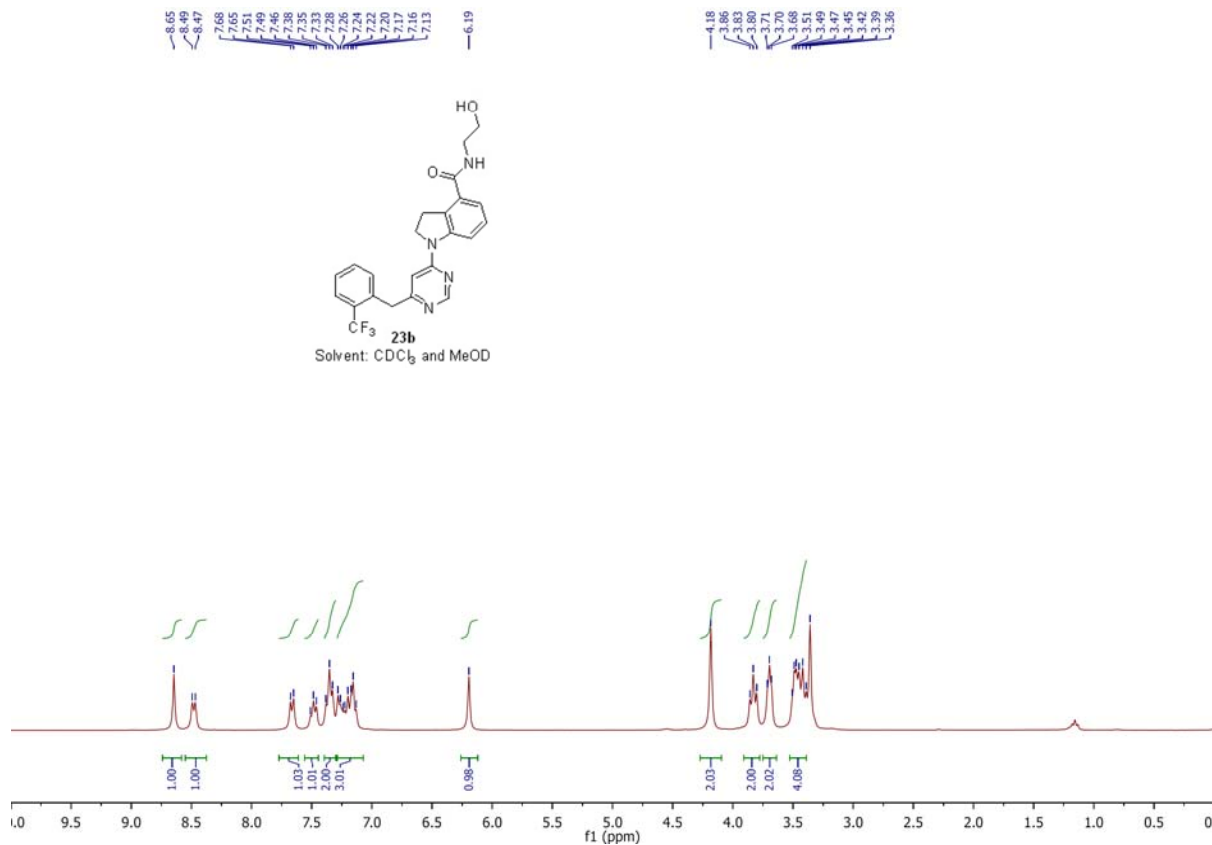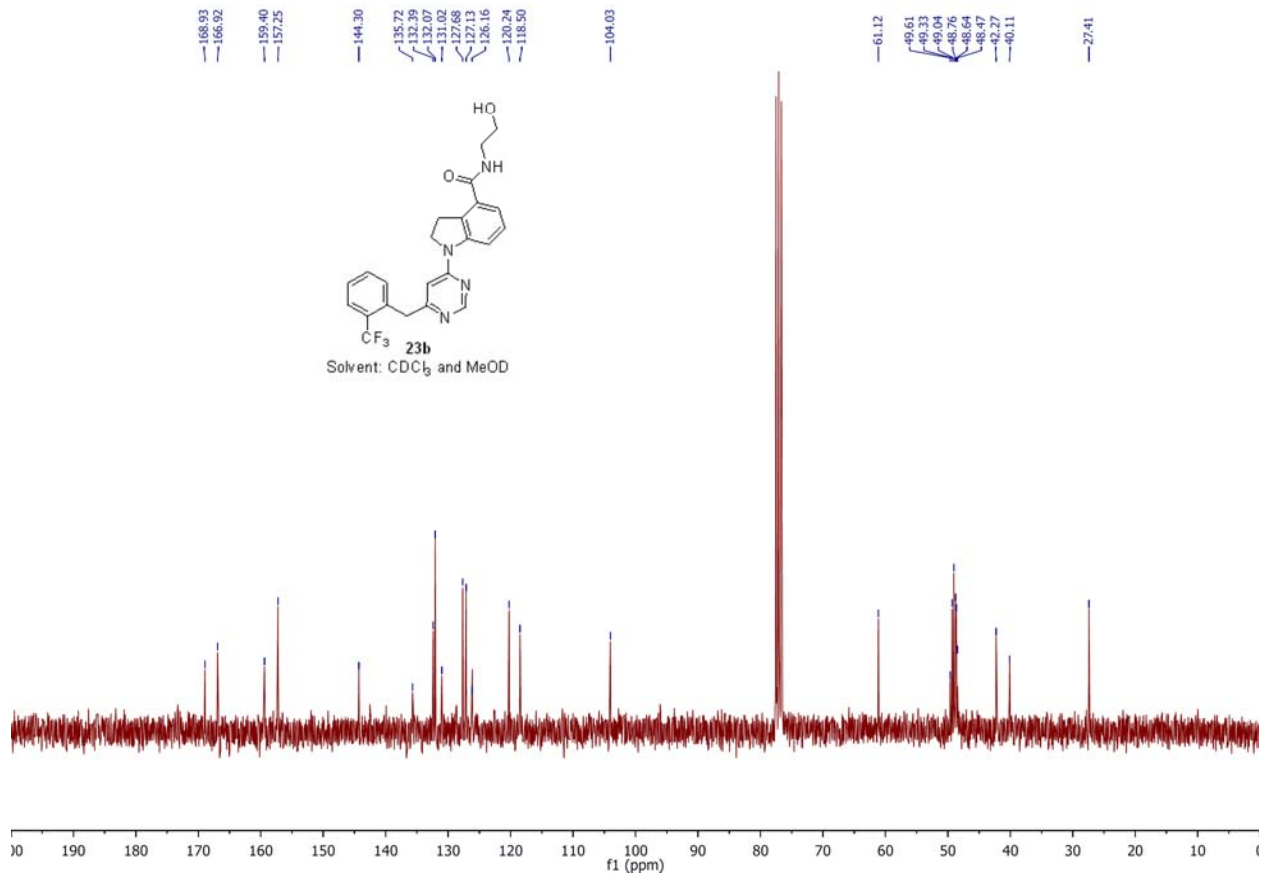



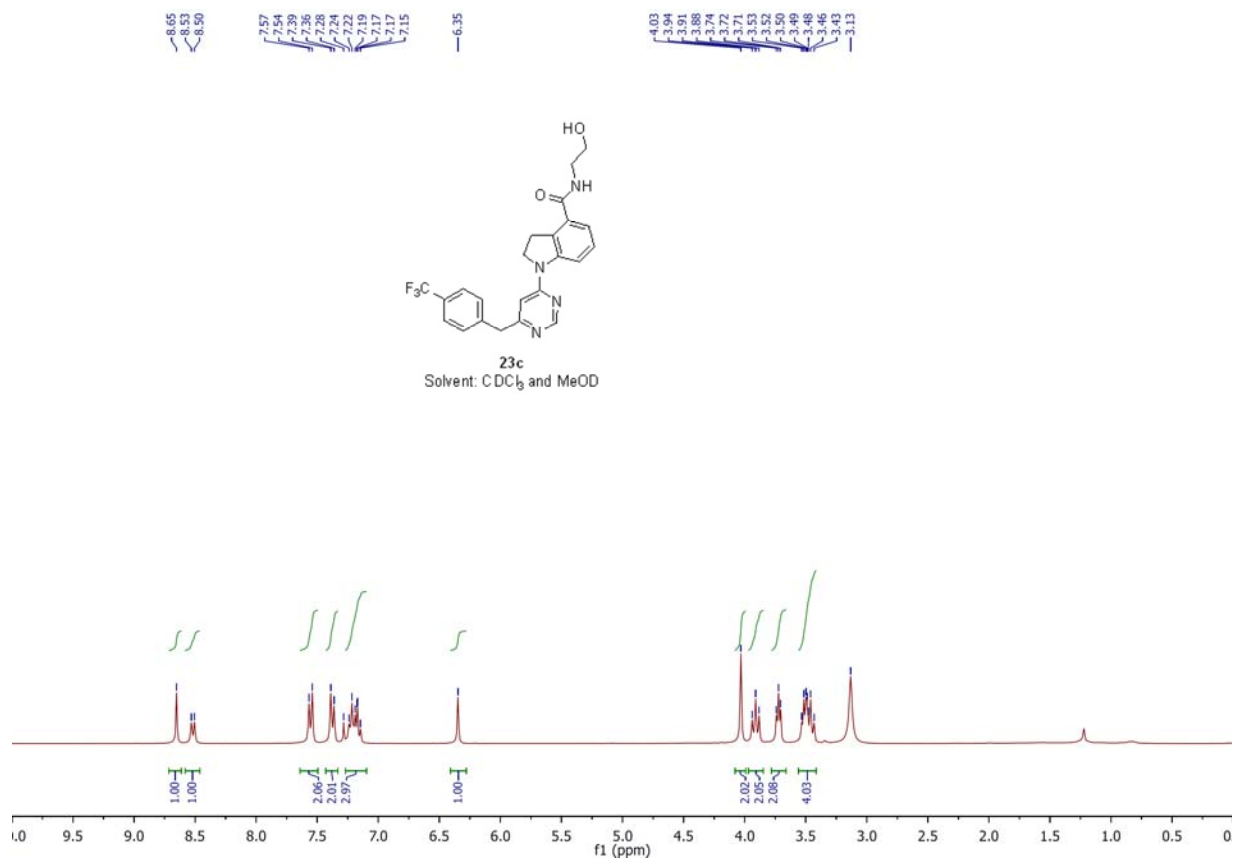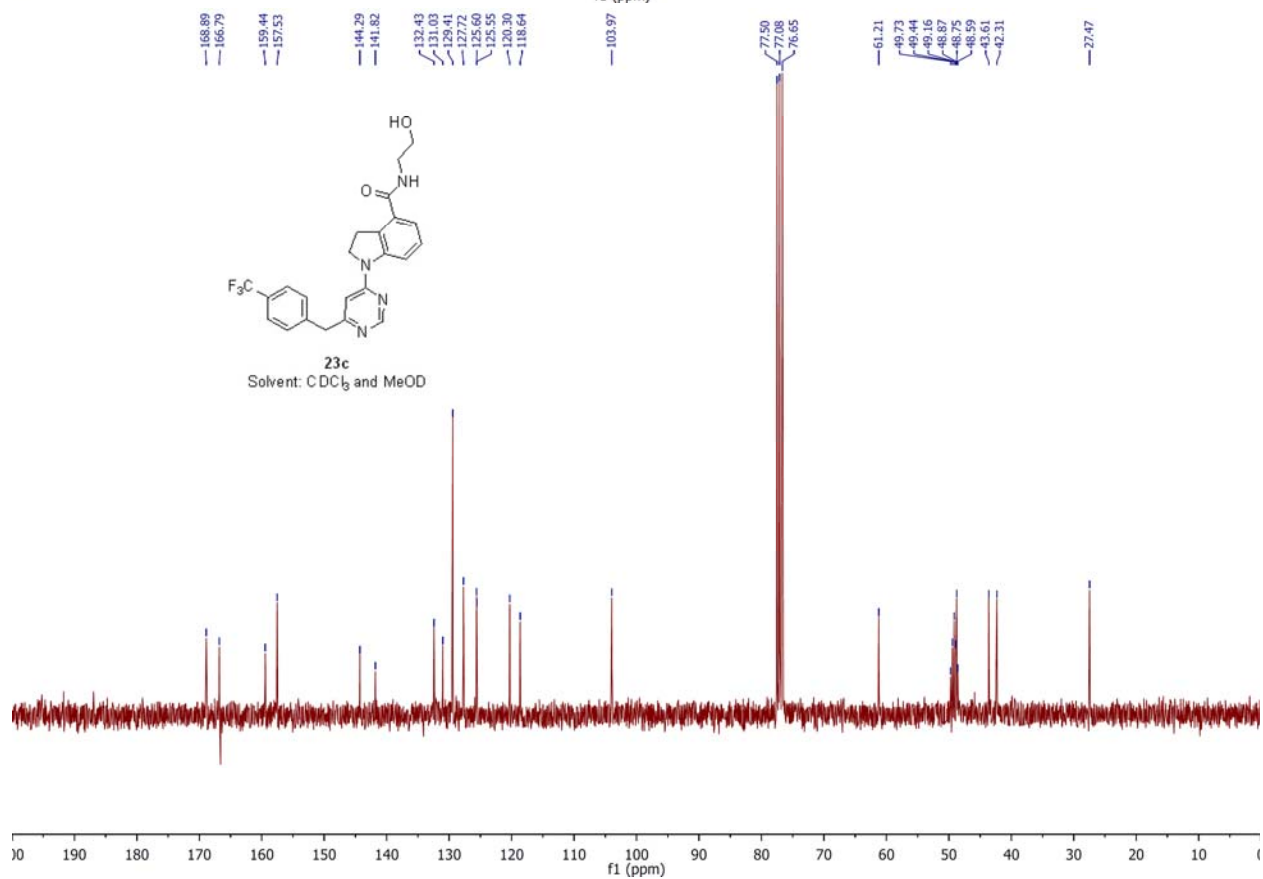

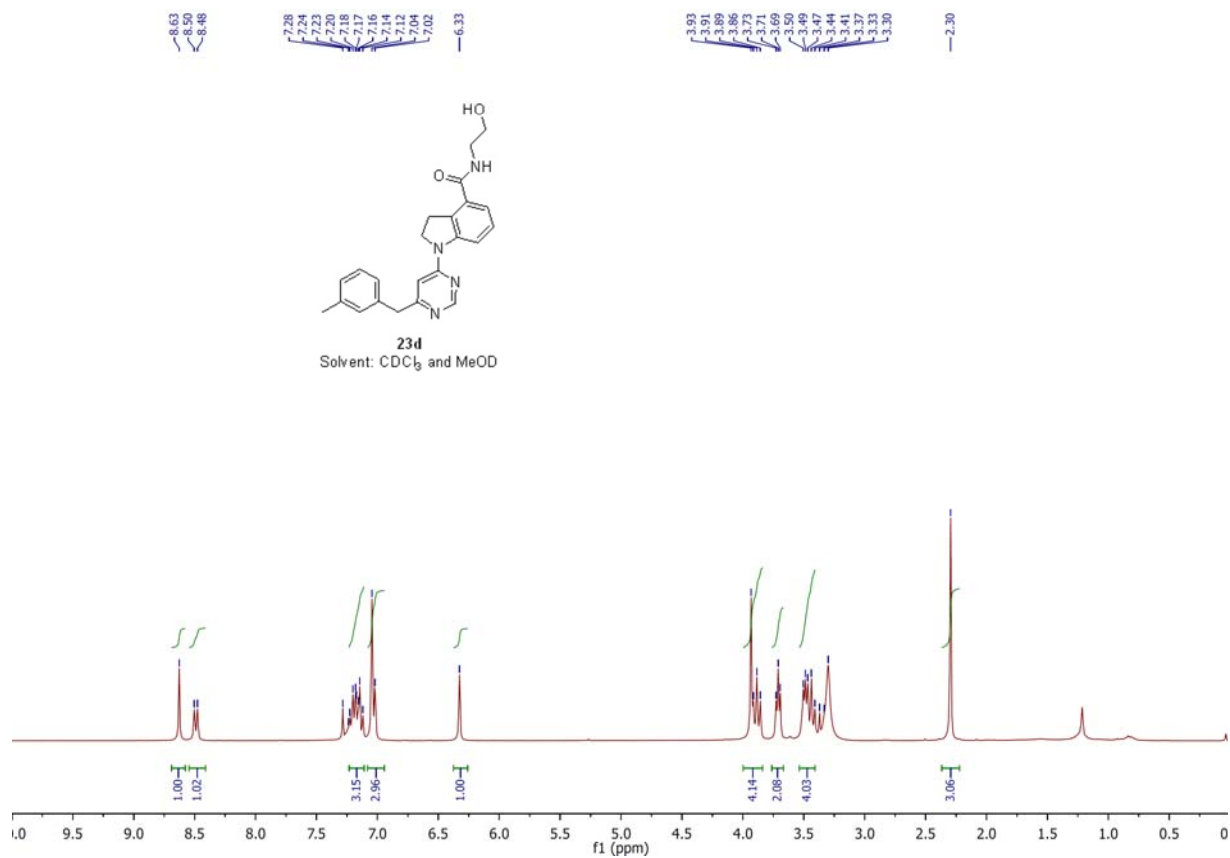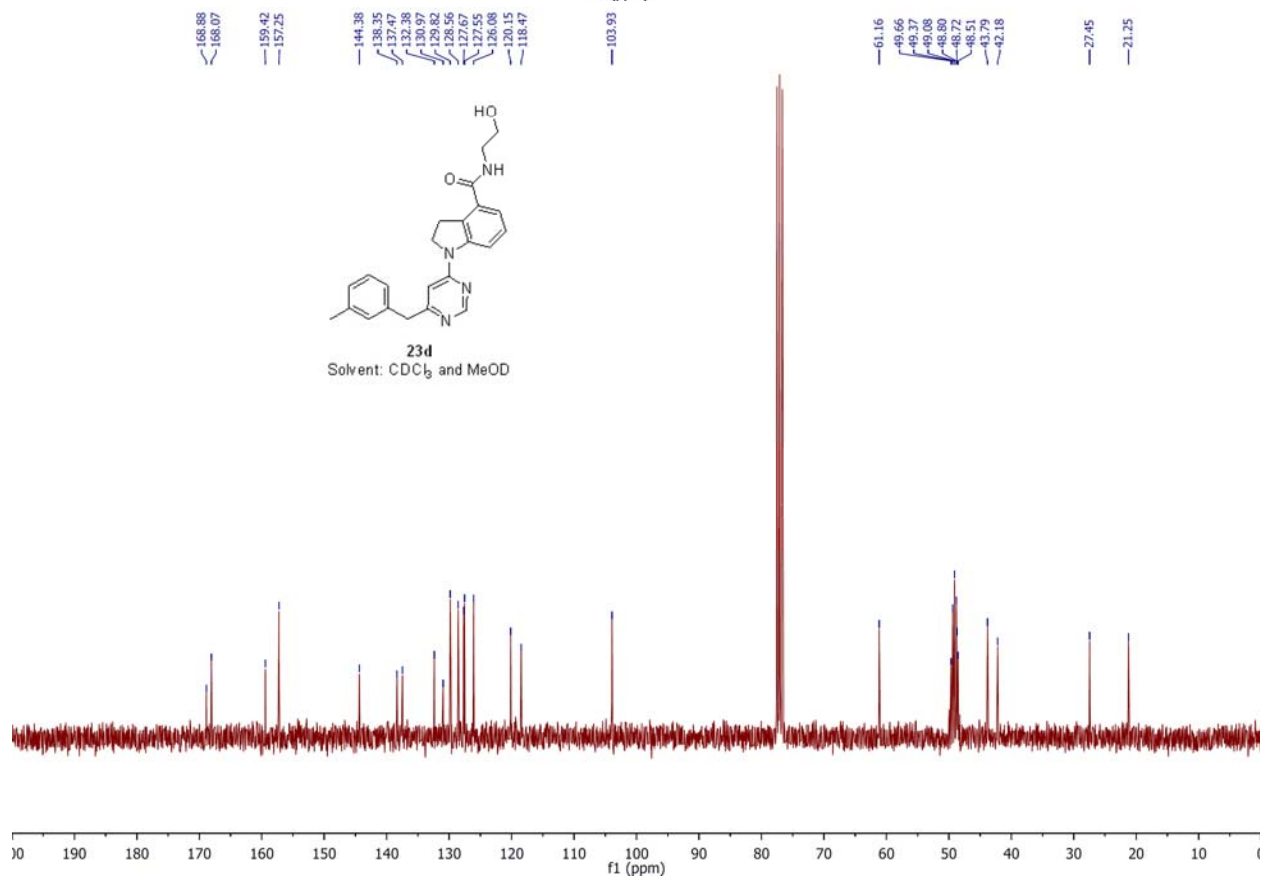

8.64  
8.52  
8.50  
7.70  
7.28  
7.27  
7.27  
7.26  
7.25  
7.24  
7.19  
7.17  
7.16  
7.14  
7.14  
7.03  
7.01  
6.96  
6.95  
6.94  
6.93  
6.92  
6.90  
6.89  
6.84

3.96  
3.94  
3.92  
3.88  
3.72  
3.71  
3.69  
3.52  
3.50  
3.48  
3.47  
3.46  
3.43  
3.30

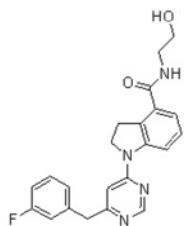

**23e**  
Solvent: CDCl<sub>3</sub> and MeOD

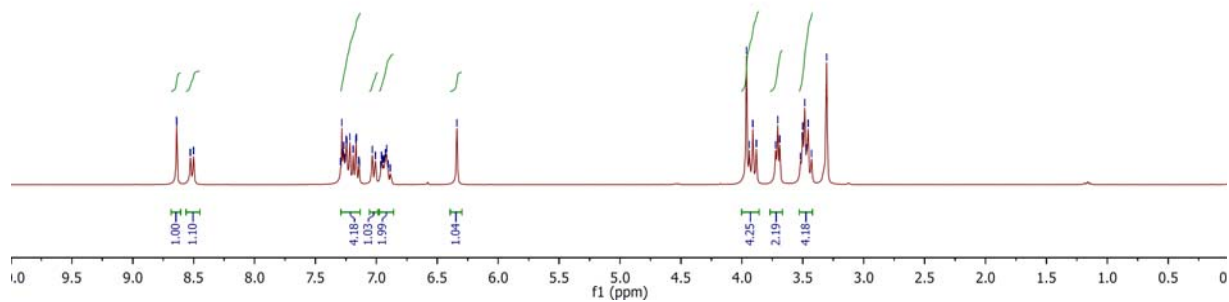

168.94  
168.86  
167.11  
164.51  
161.25  
159.45  
157.40

144.30  
140.09  
139.99  
132.41  
131.95  
131.09  
130.20  
130.09  
127.80  
127.71  
124.78  
124.74  
120.28  
118.59  
116.99  
115.89  
113.87  
113.59  
103.94

61.14  
49.91  
49.63  
49.34  
49.06  
48.78  
48.25  
48.49  
48.21  
43.47  
43.44  
42.28  
42.16  
27.45

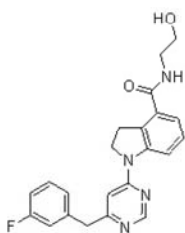

**23e**  
Solvent: CDCl<sub>3</sub> and MeOD

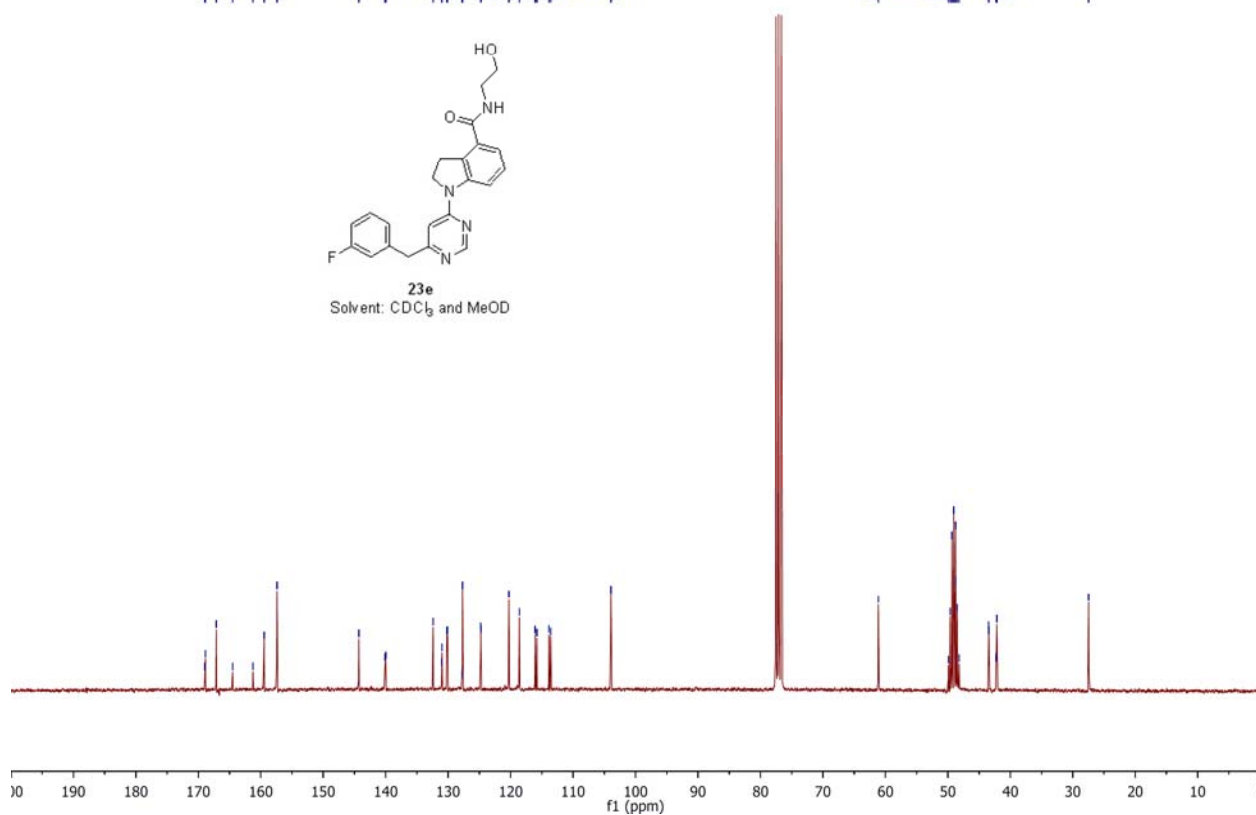

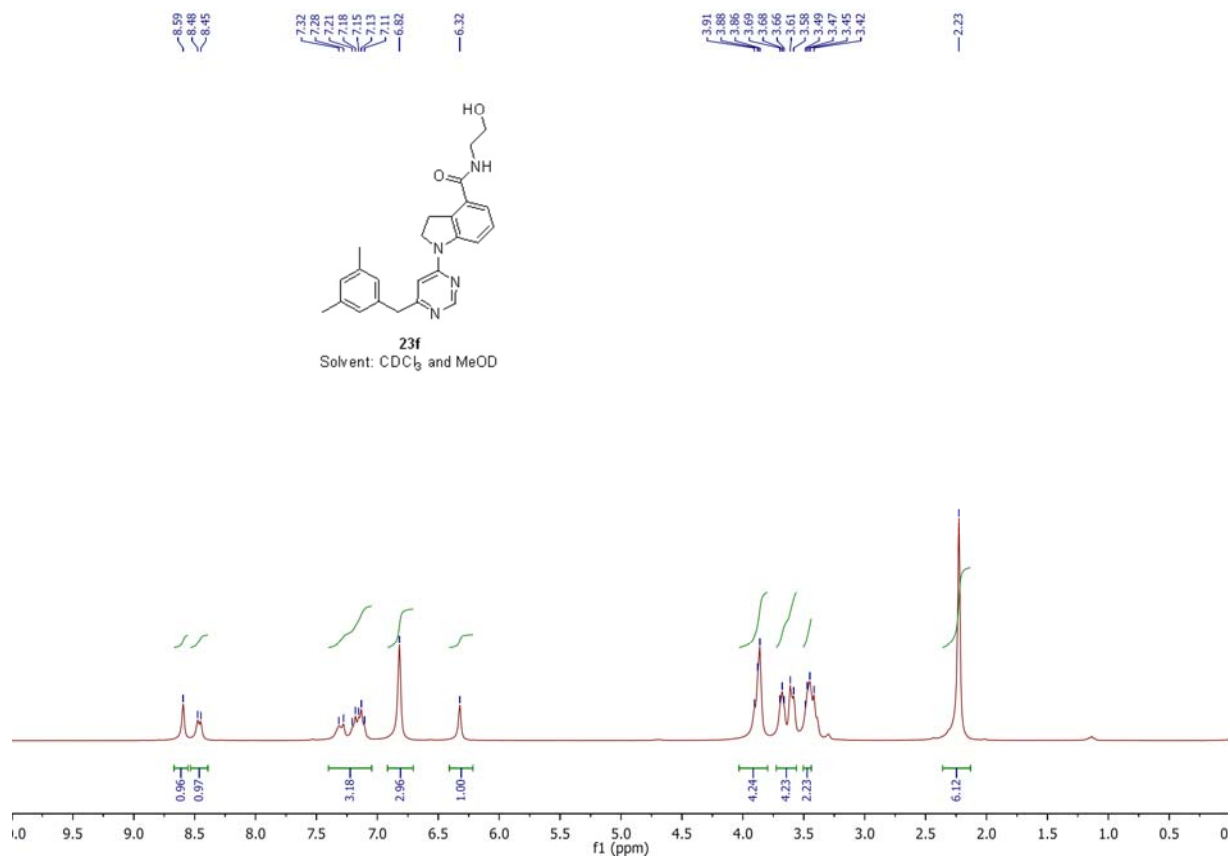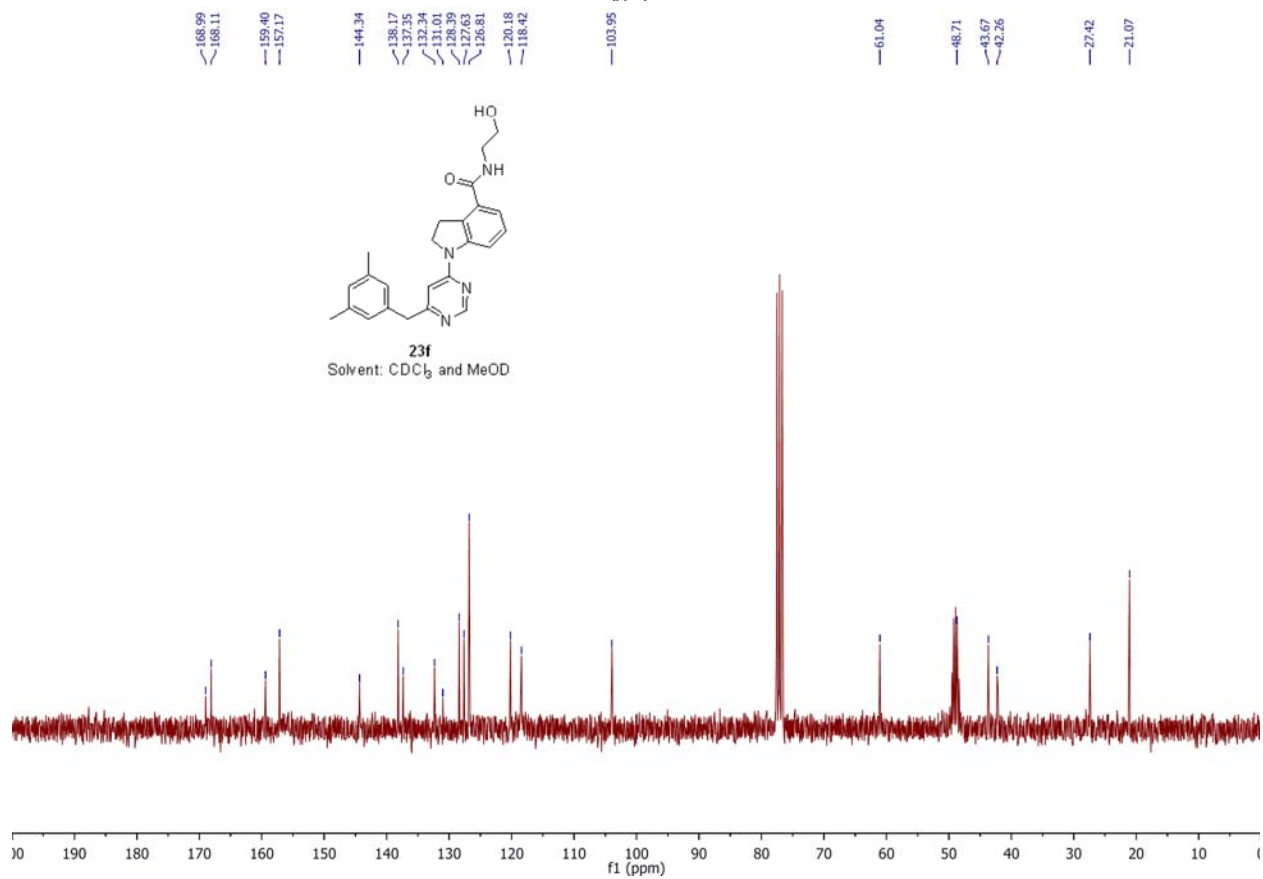

8.68  
8.59  
8.57

7.48  
7.37  
7.30  
7.28  
7.24  
6.82  
6.75  
6.72  
6.69  
6.43

4.01  
3.99  
3.96  
3.85  
3.72  
3.74  
3.54  
3.51  
3.48

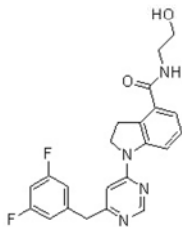

**23g**

Solvent: CDCl<sub>3</sub> and MeOD

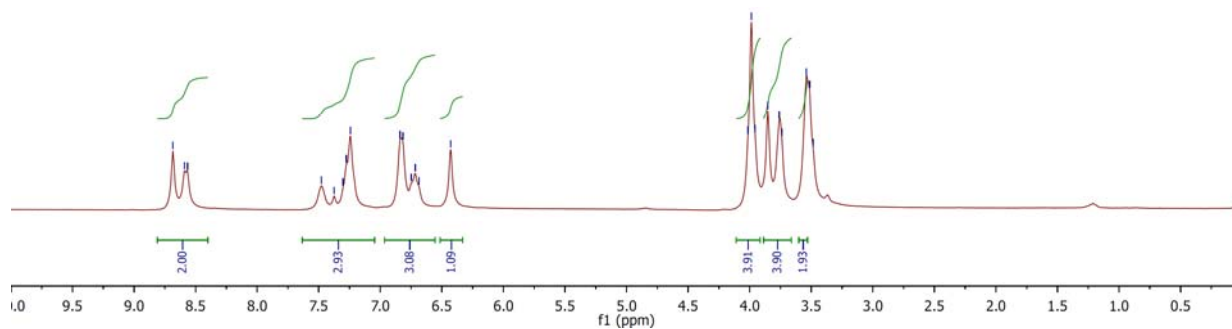

172.96  
172.88  
170.14  
168.73  
168.35  
167.42  
163.43  
161.41

148.15  
145.41  
136.34  
135.07  
131.66  
124.43  
122.63  
116.03  
115.70  
107.99  
106.57  
106.24  
105.90

64.96  
52.72  
47.22  
46.23  
46.11  
31.38

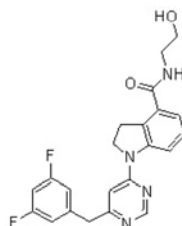

**23g**

Solvent: CDCl<sub>3</sub> and MeOD

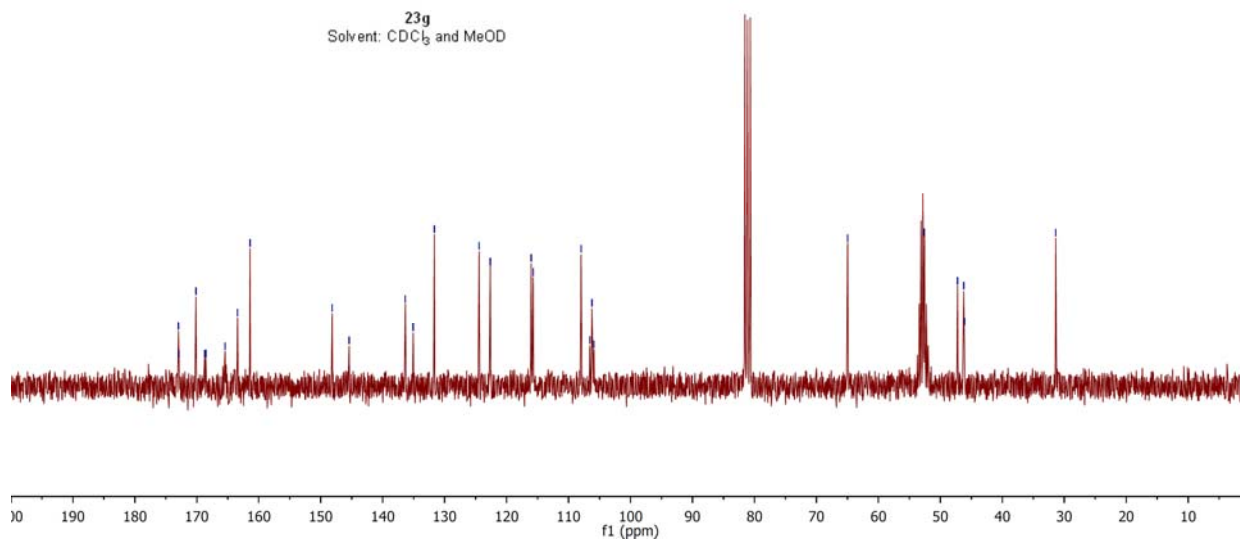

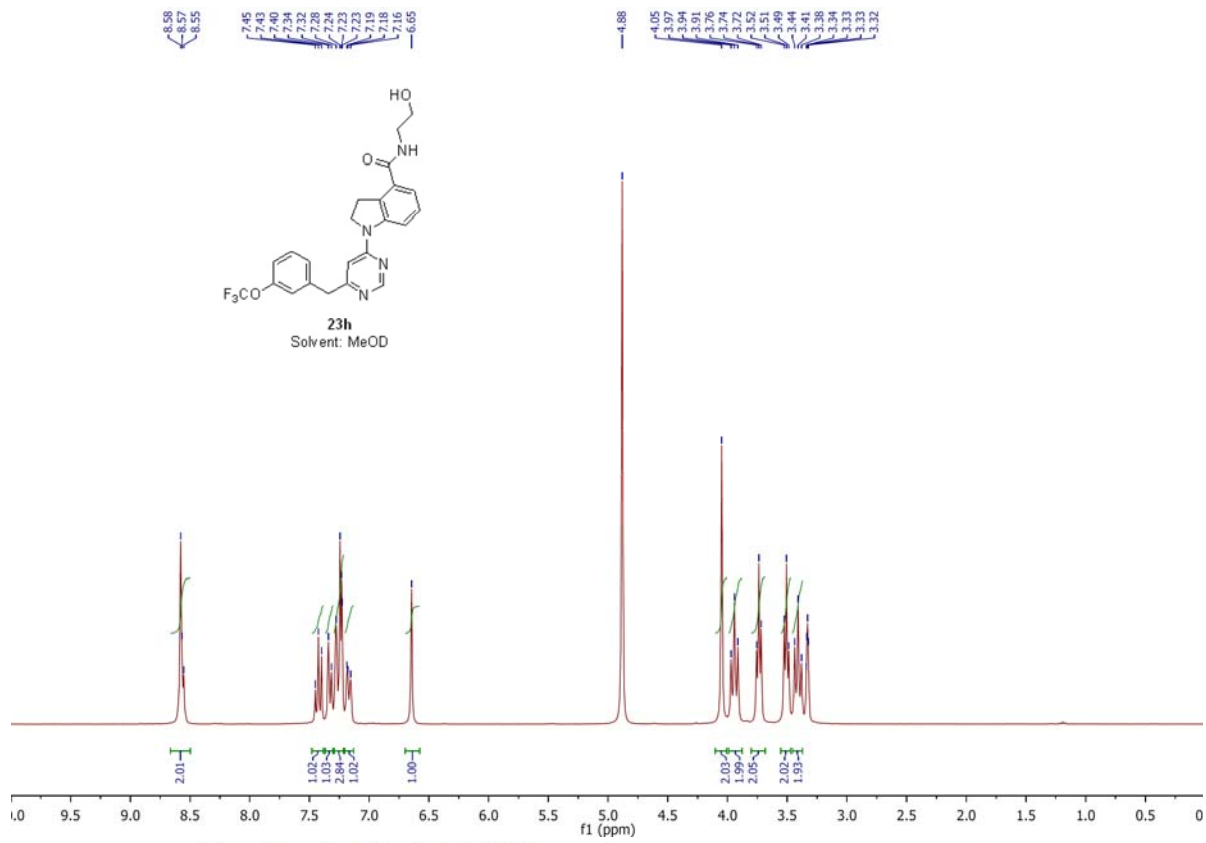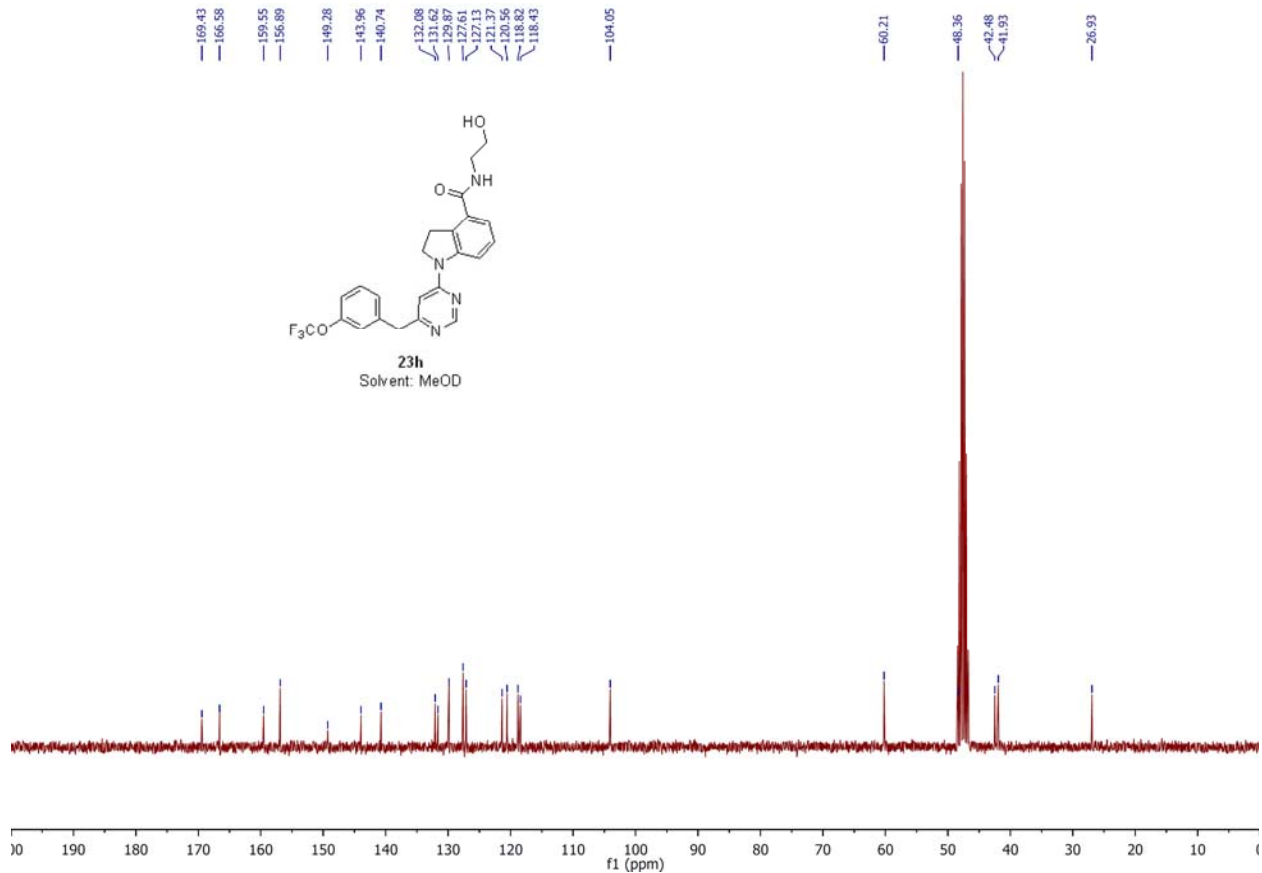

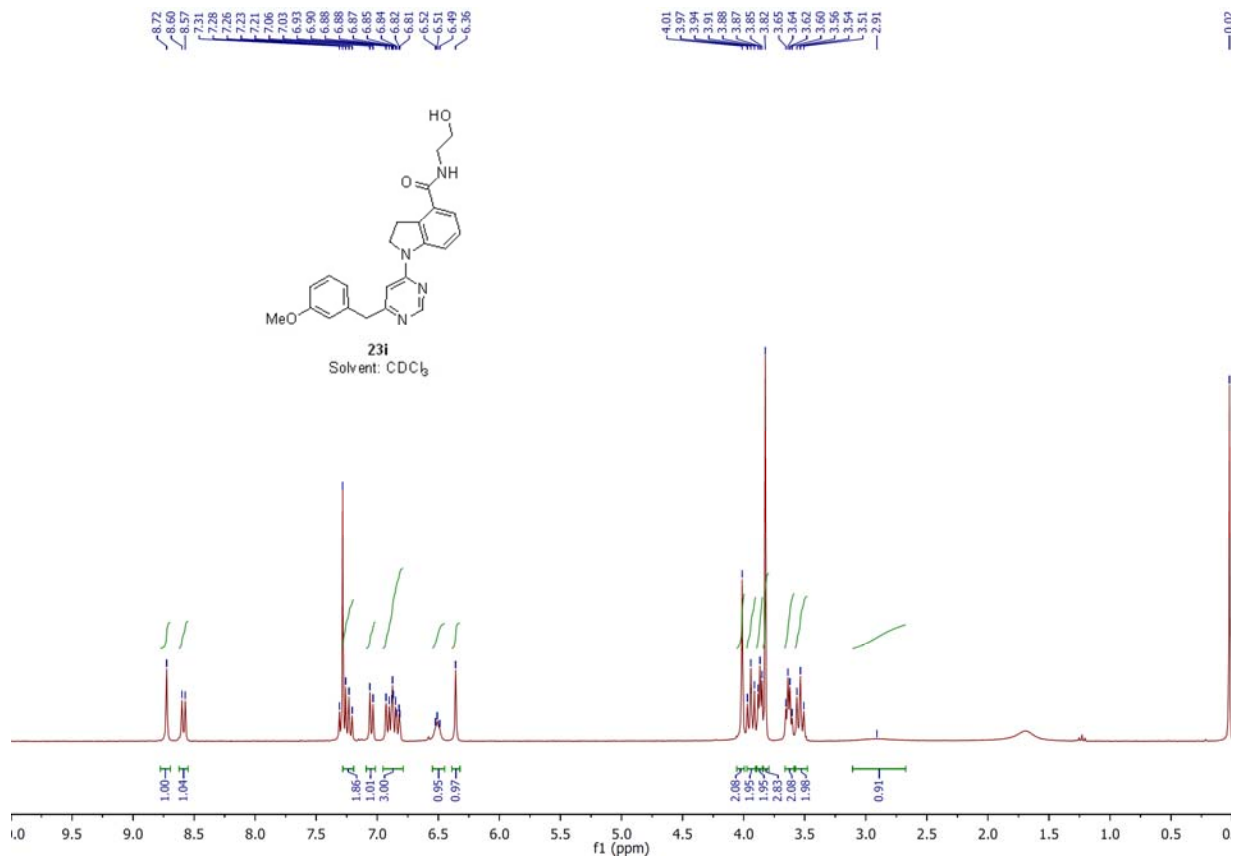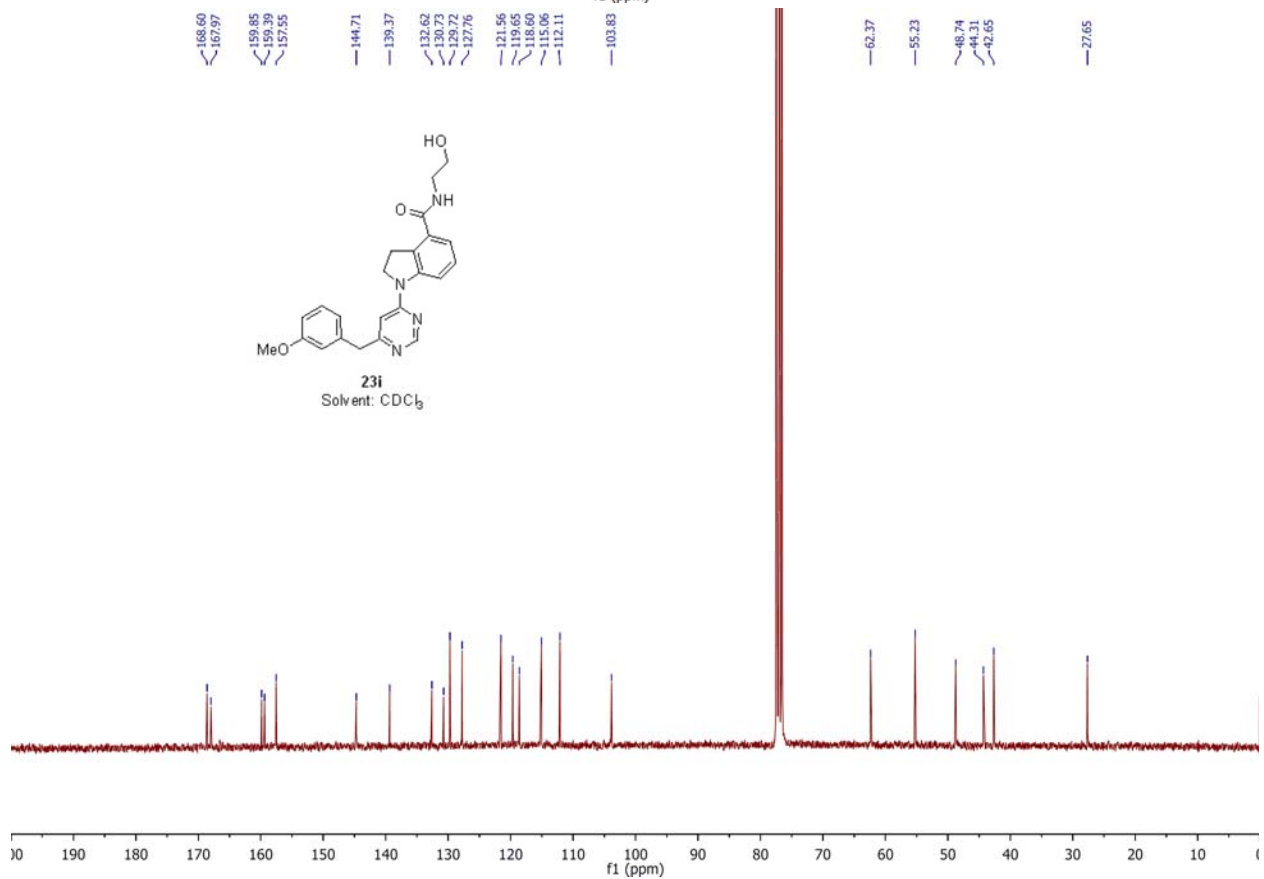

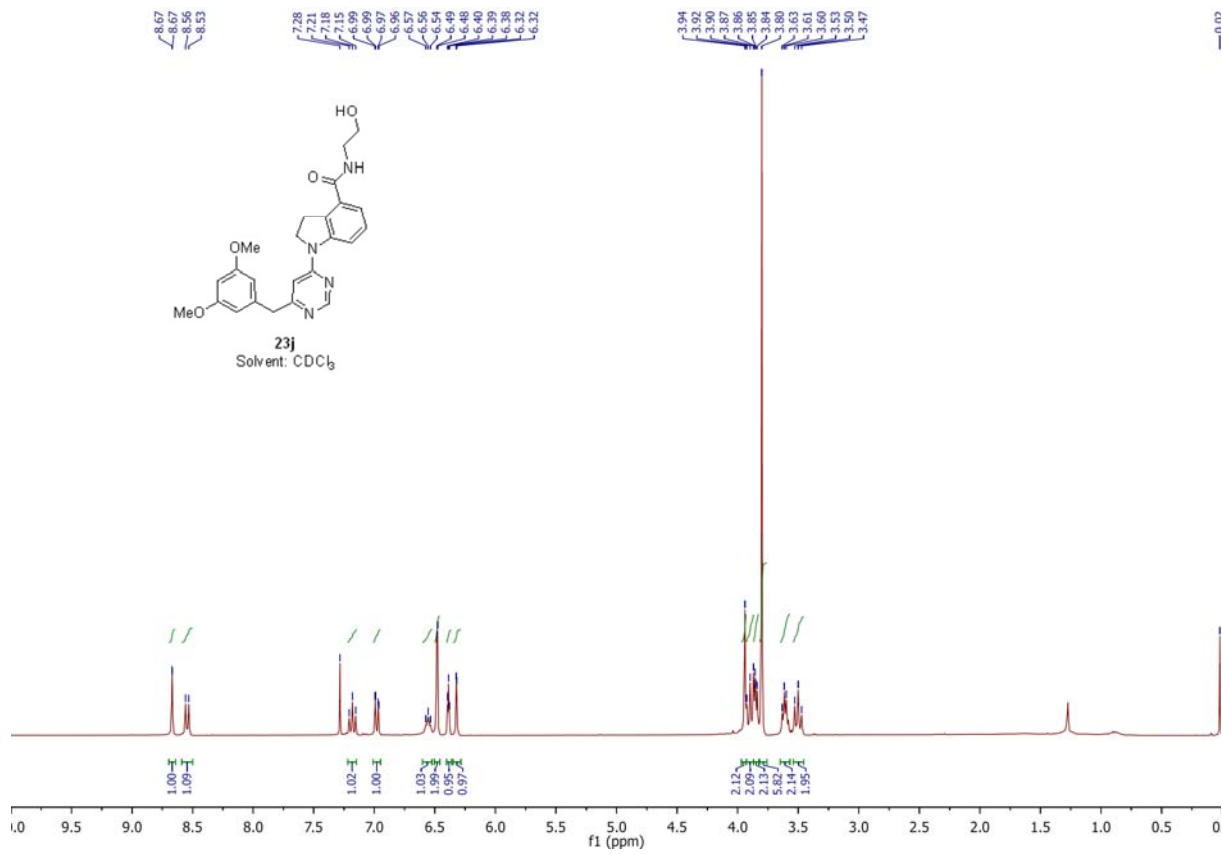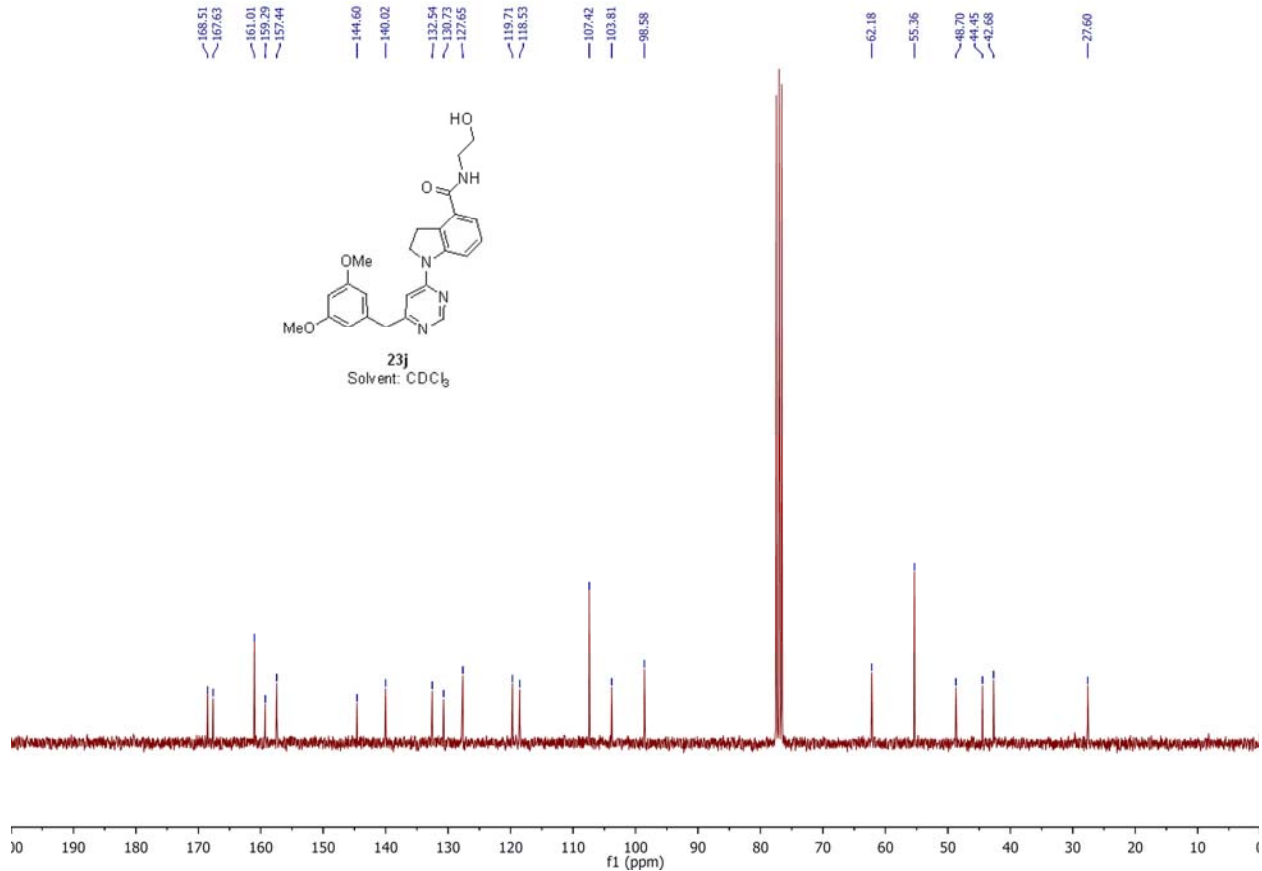



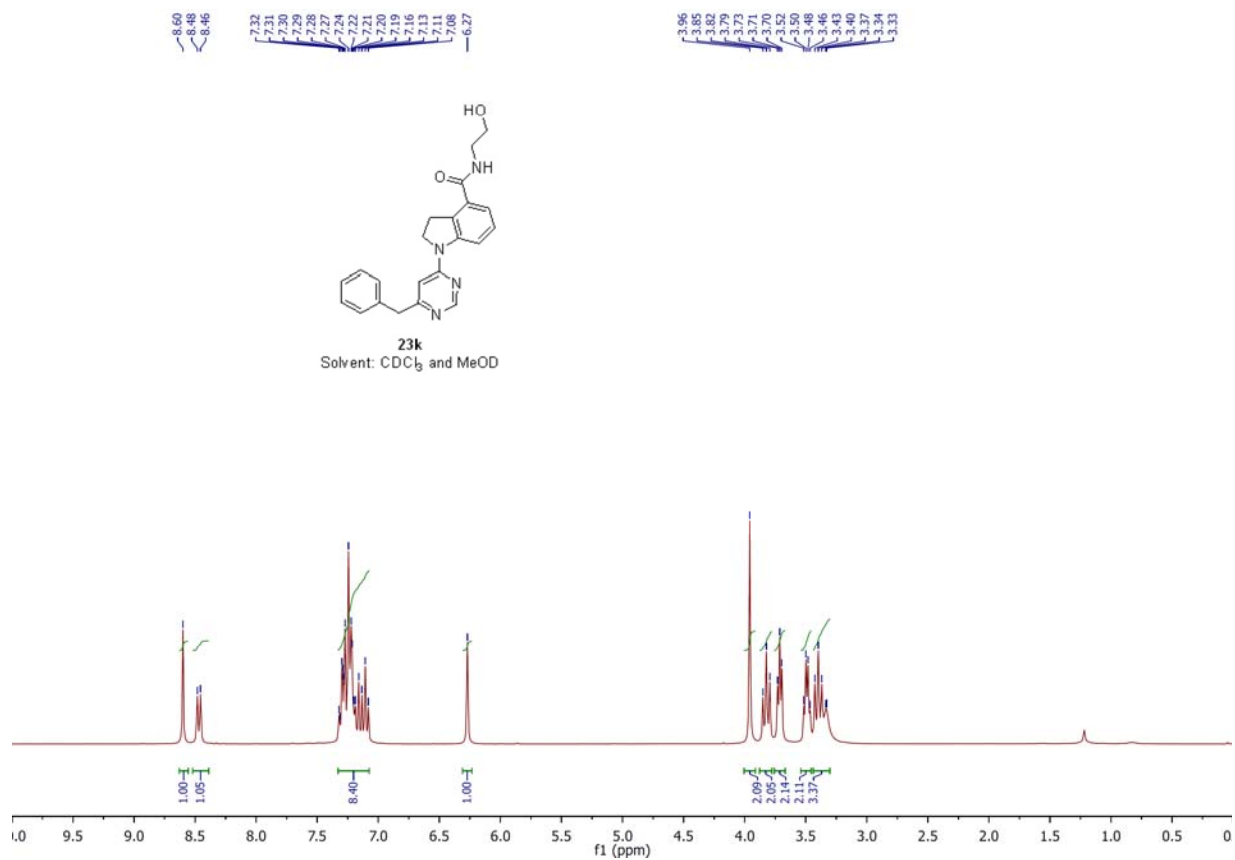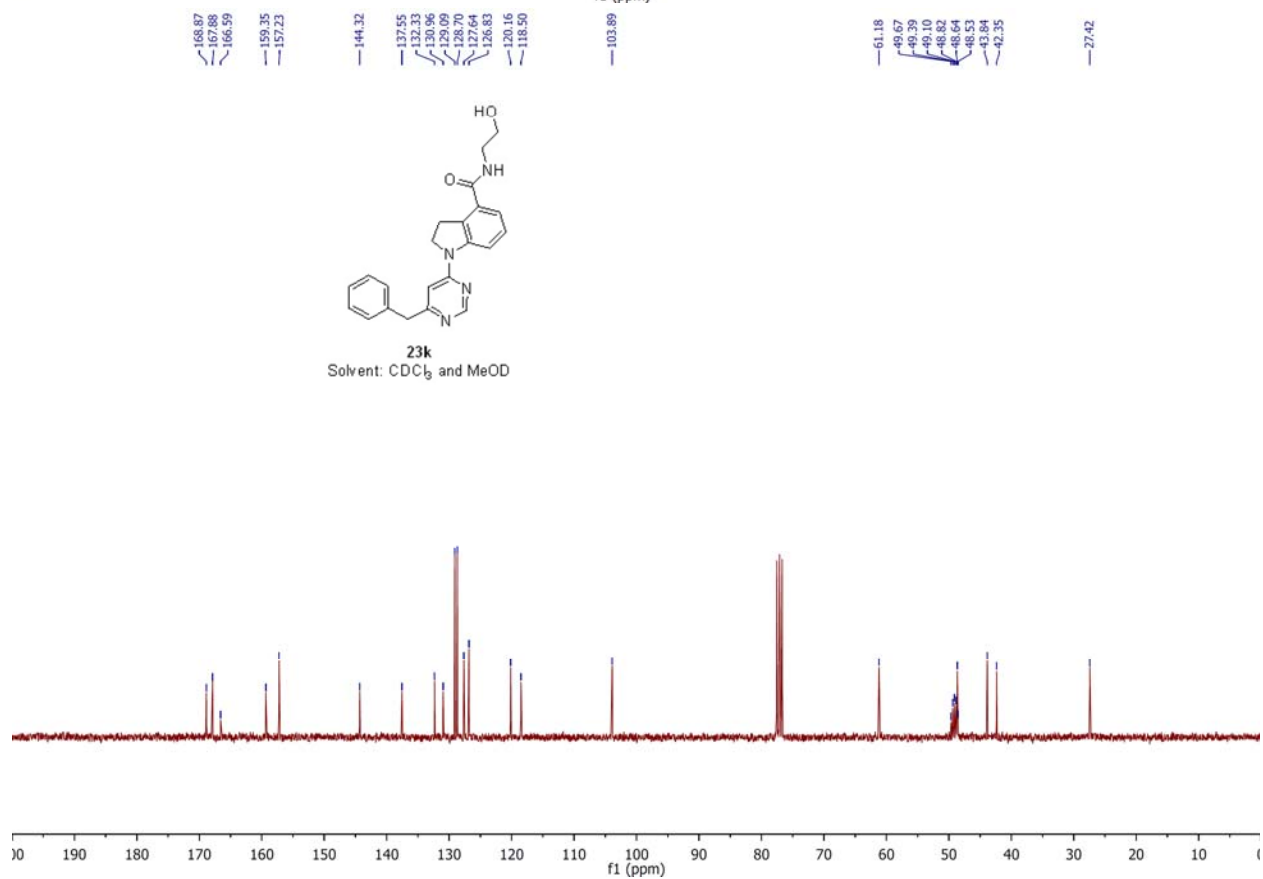

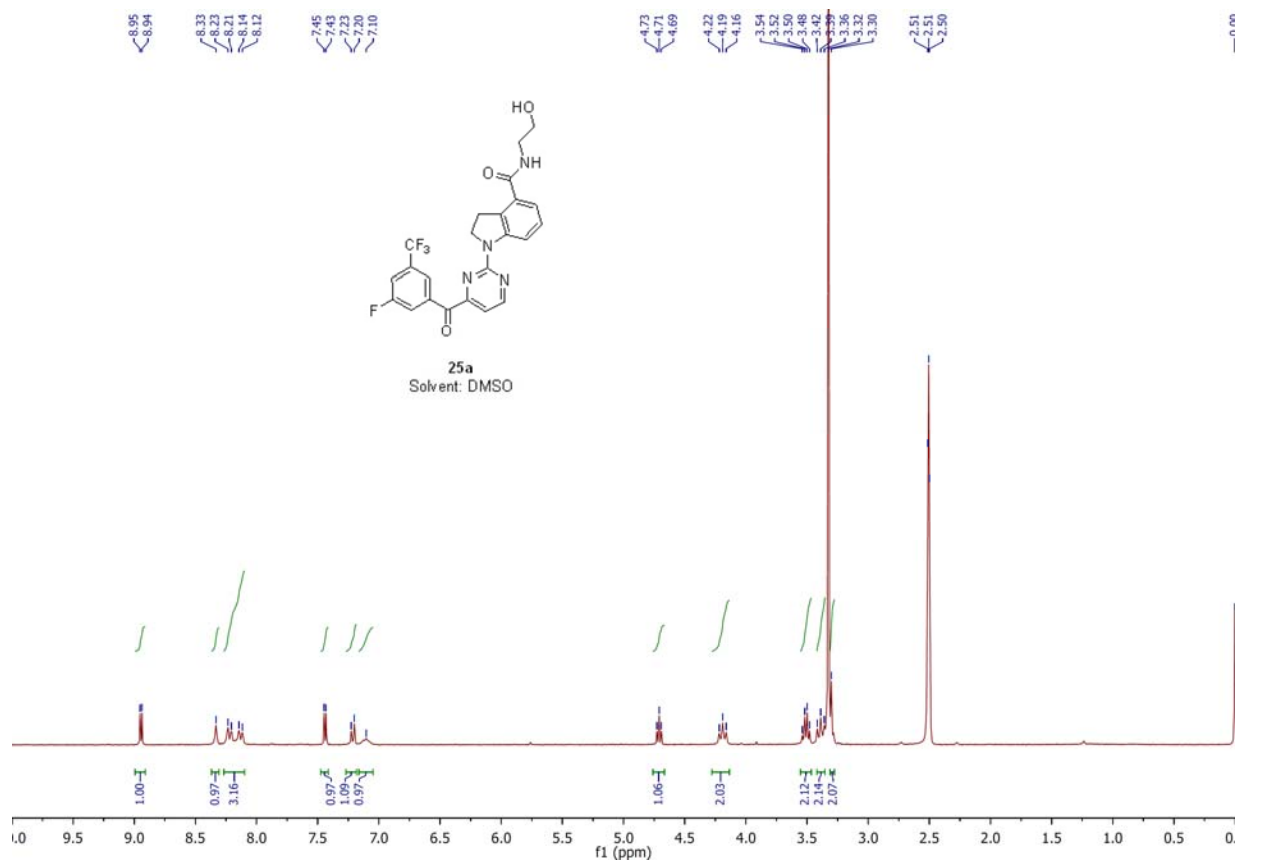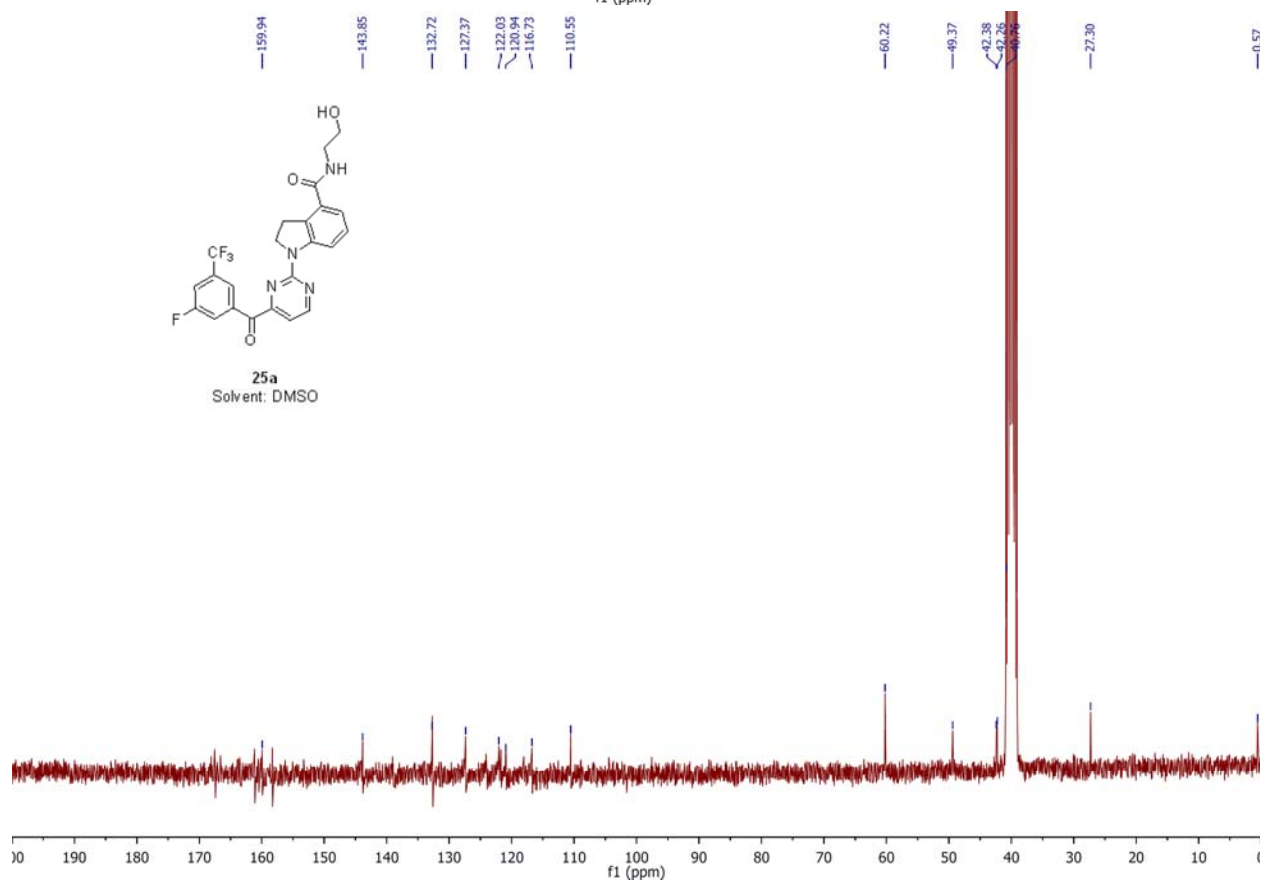

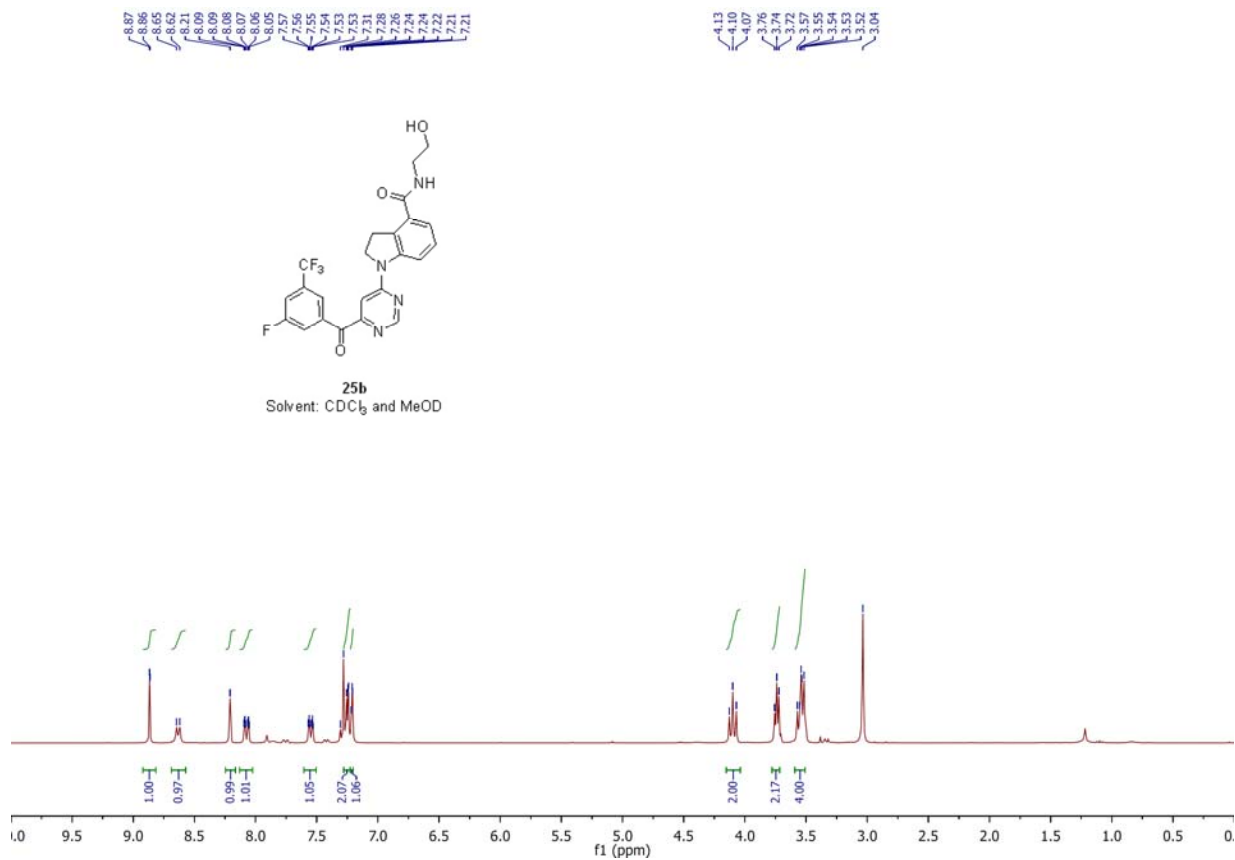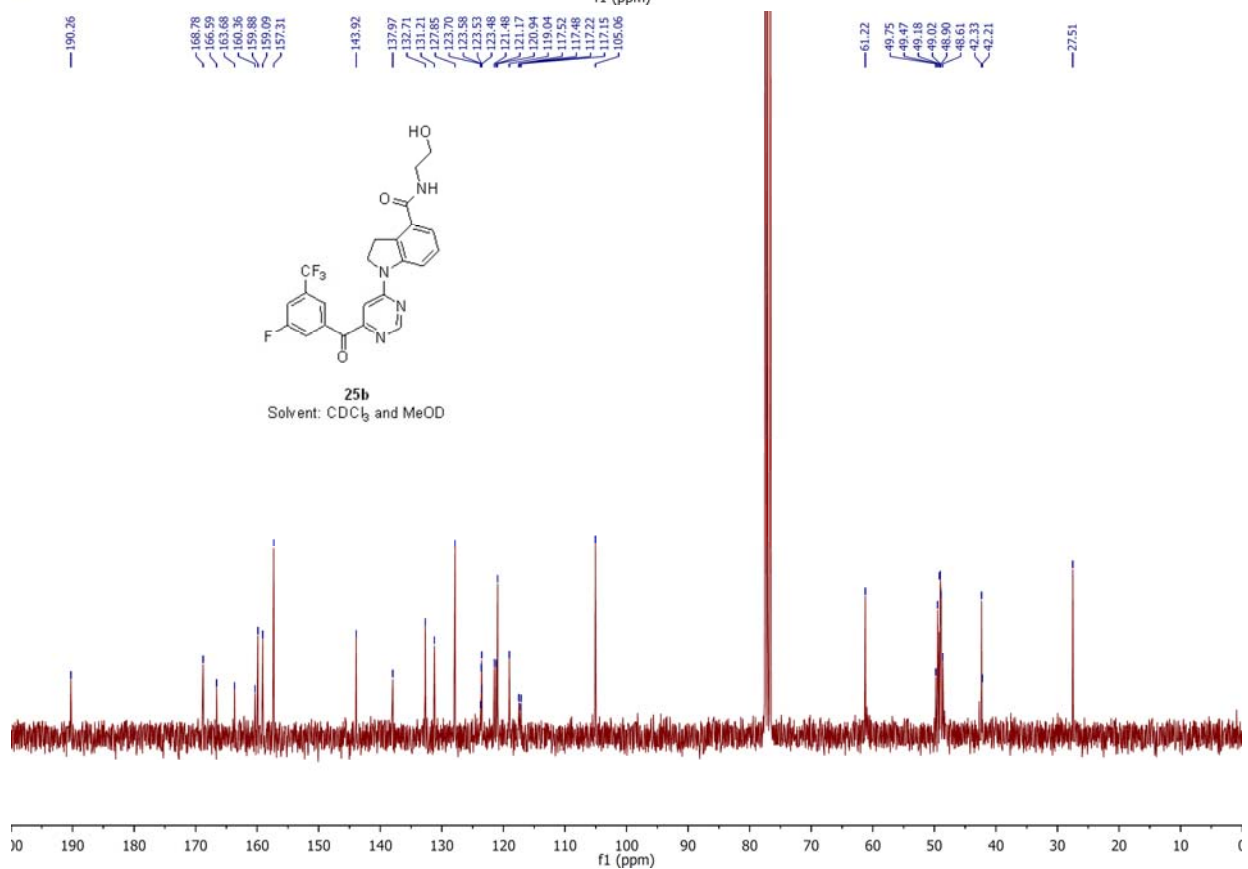

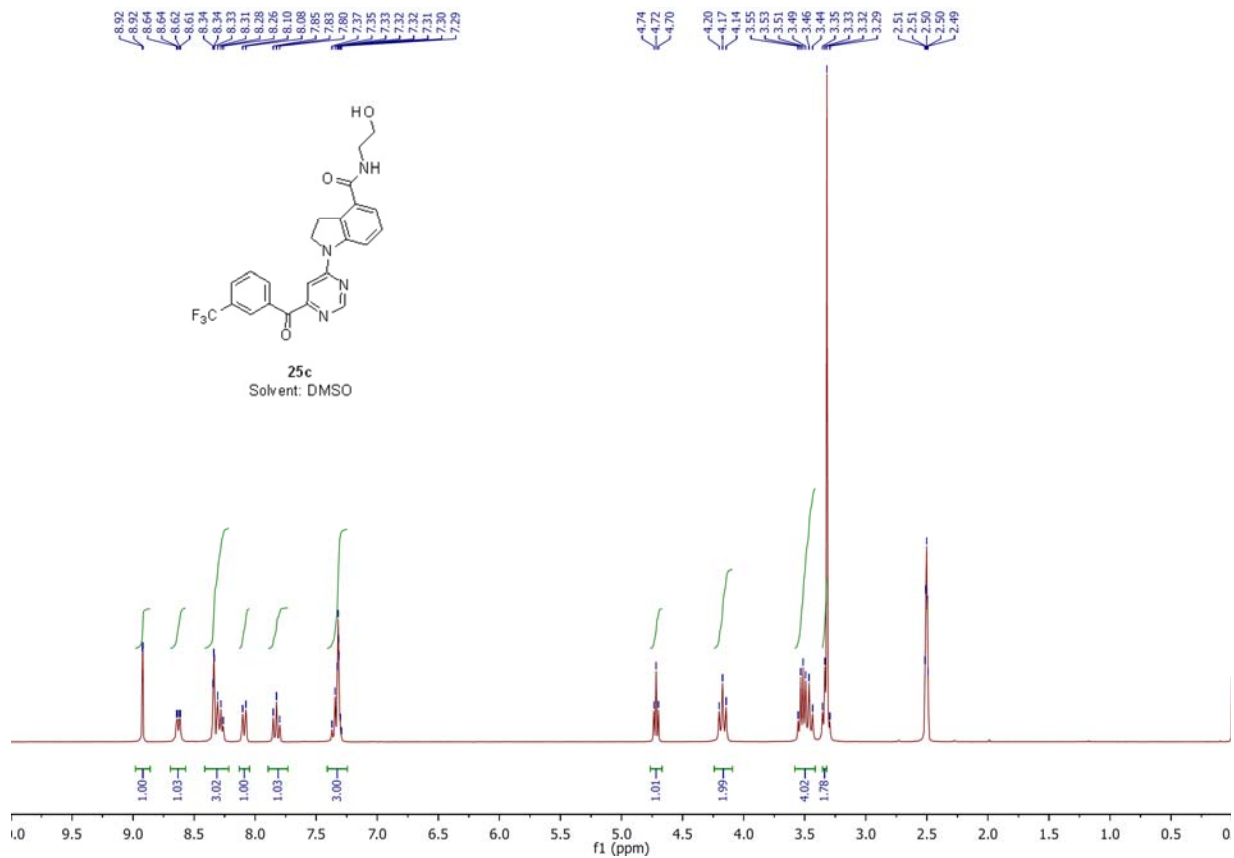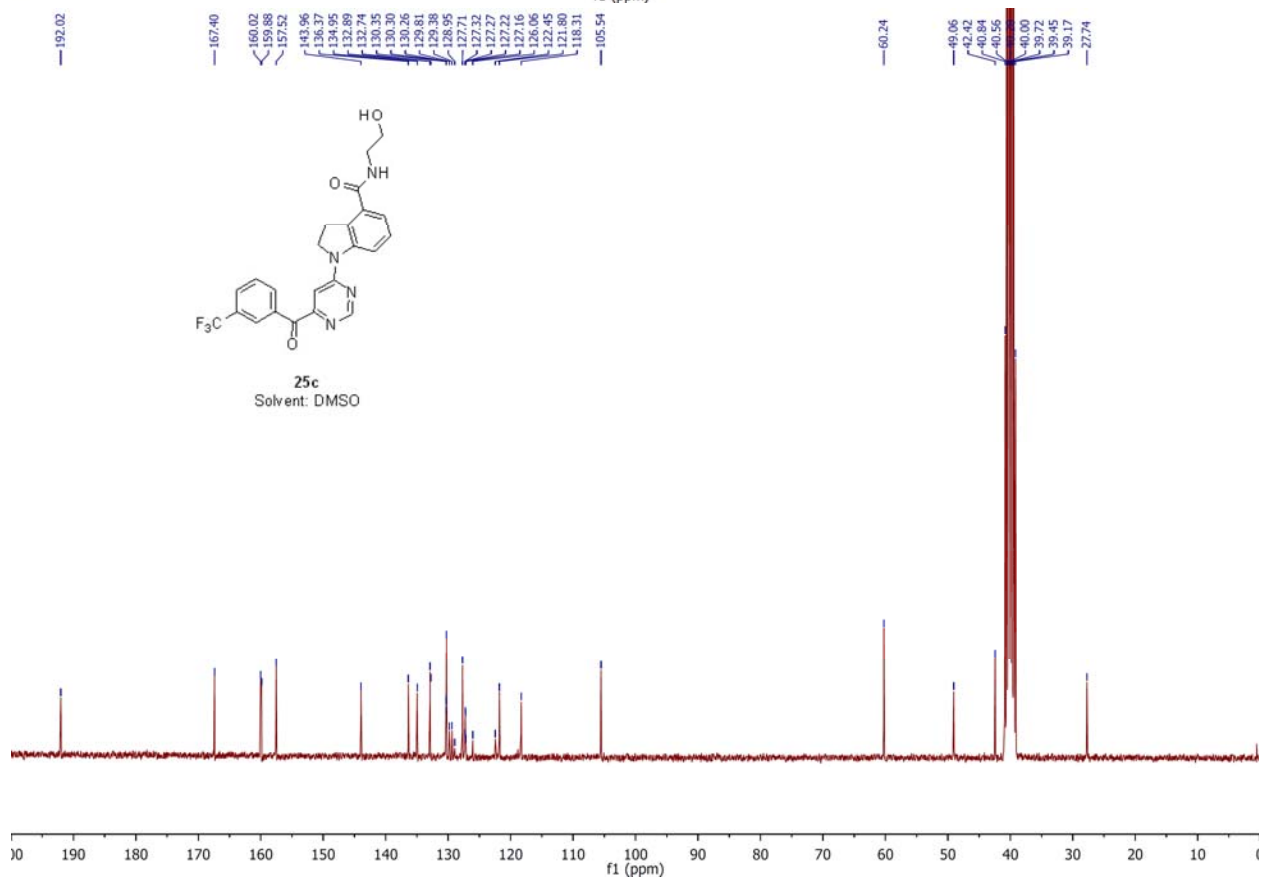

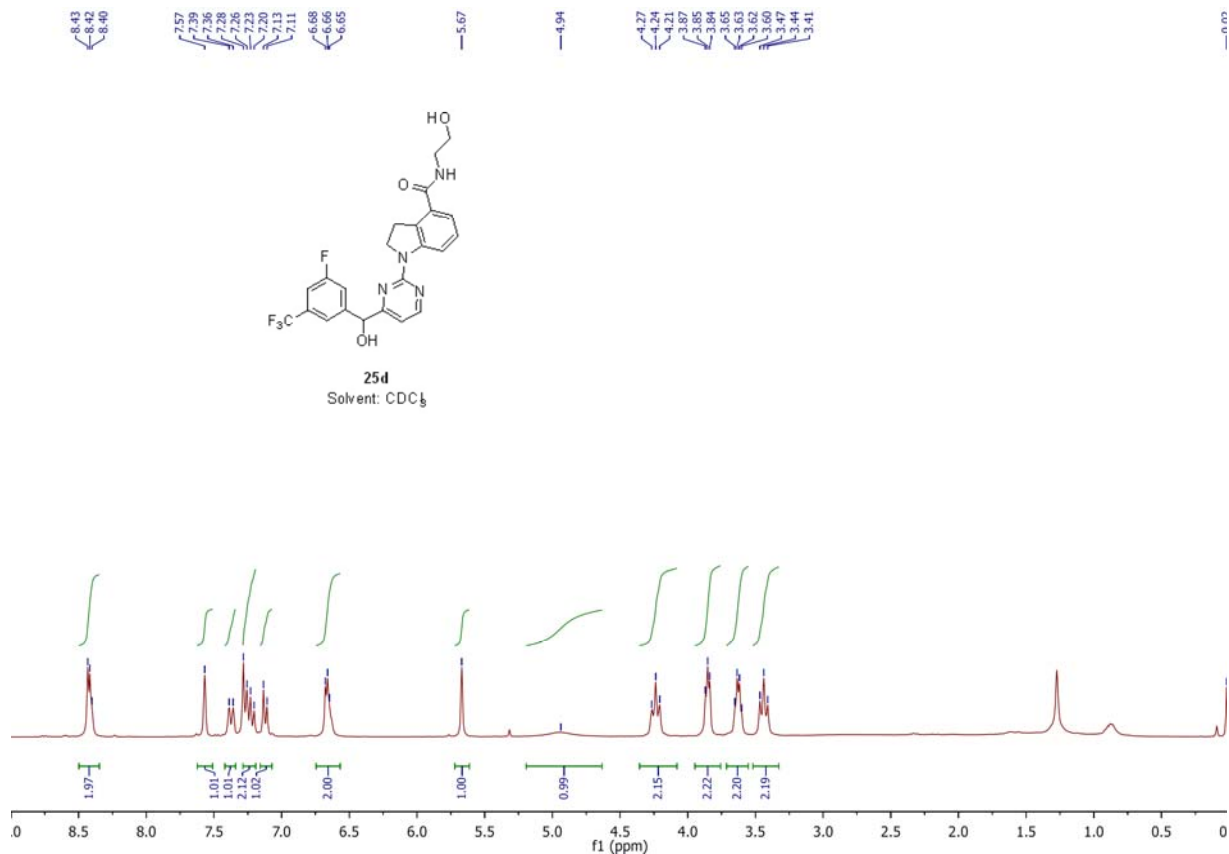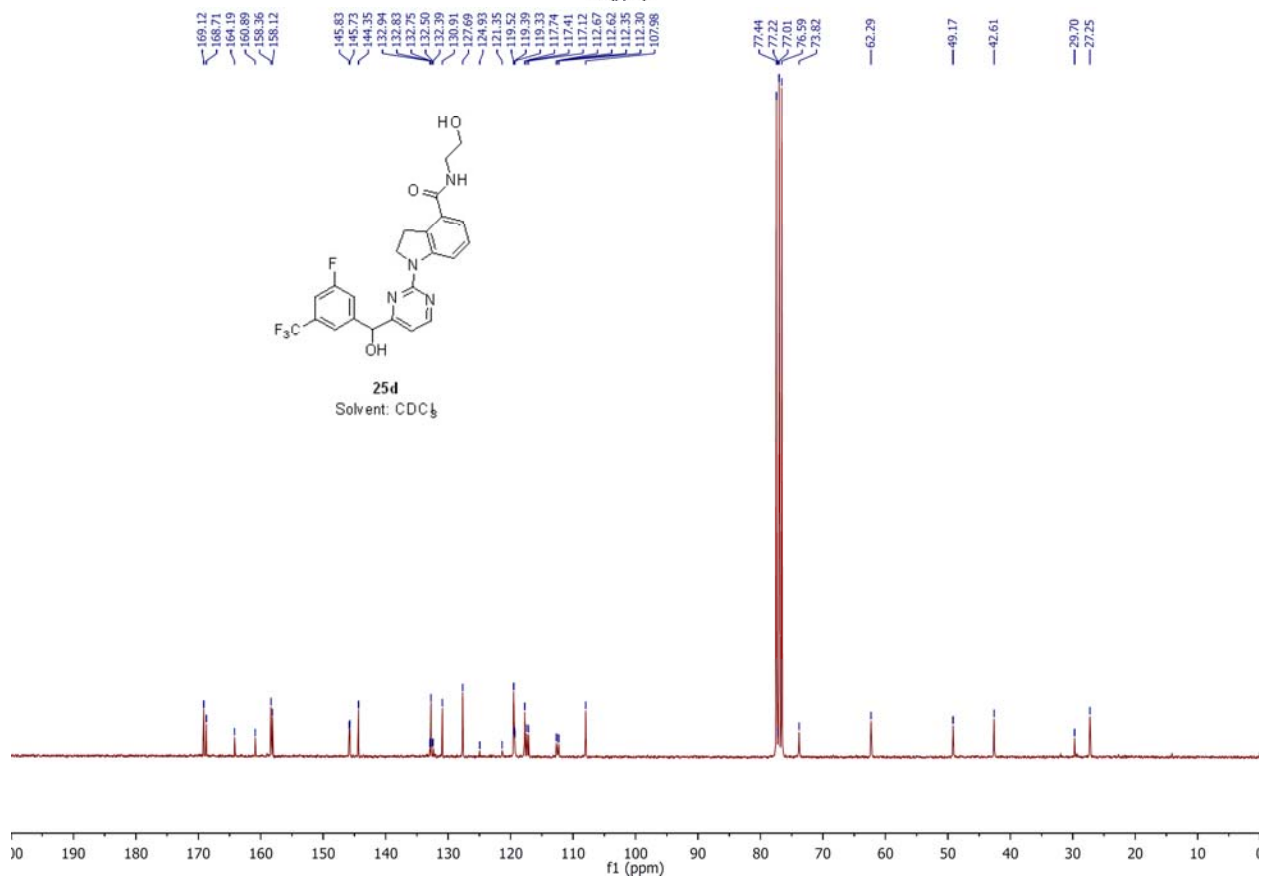

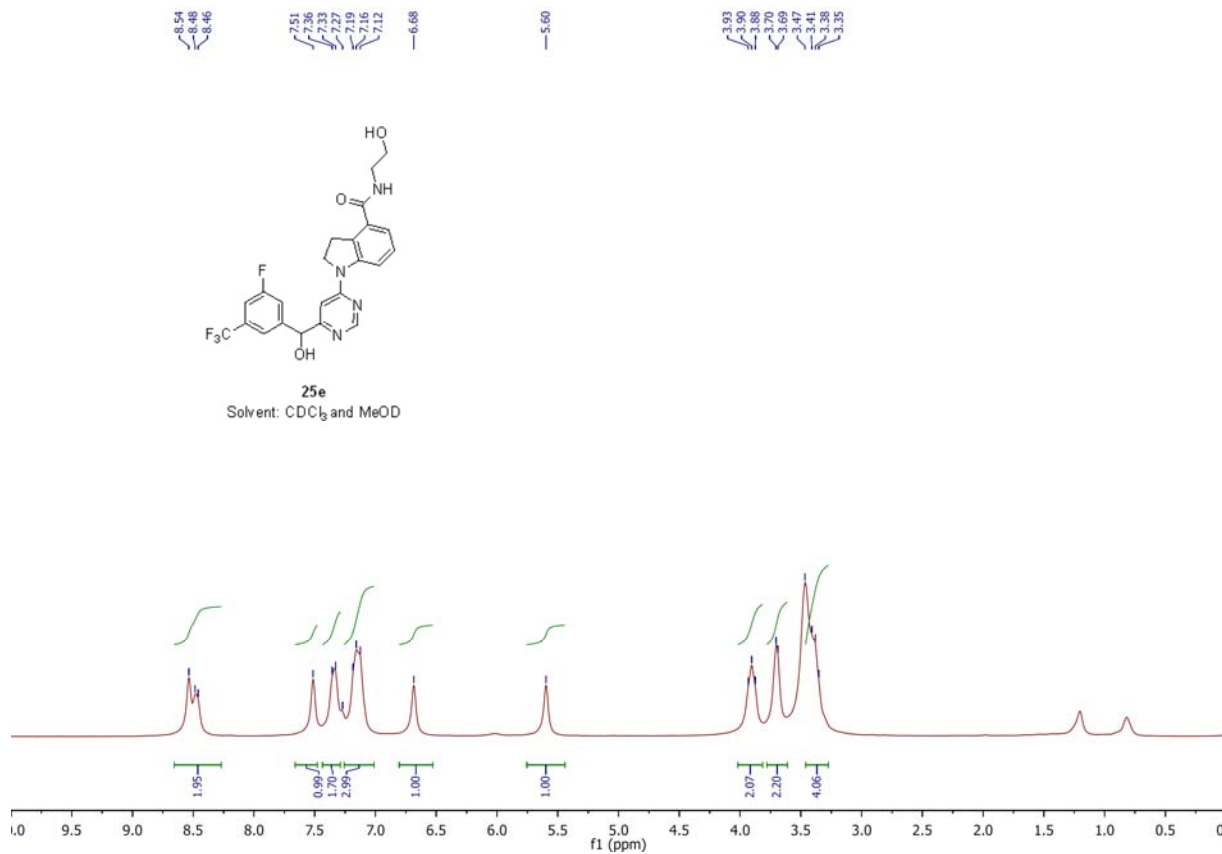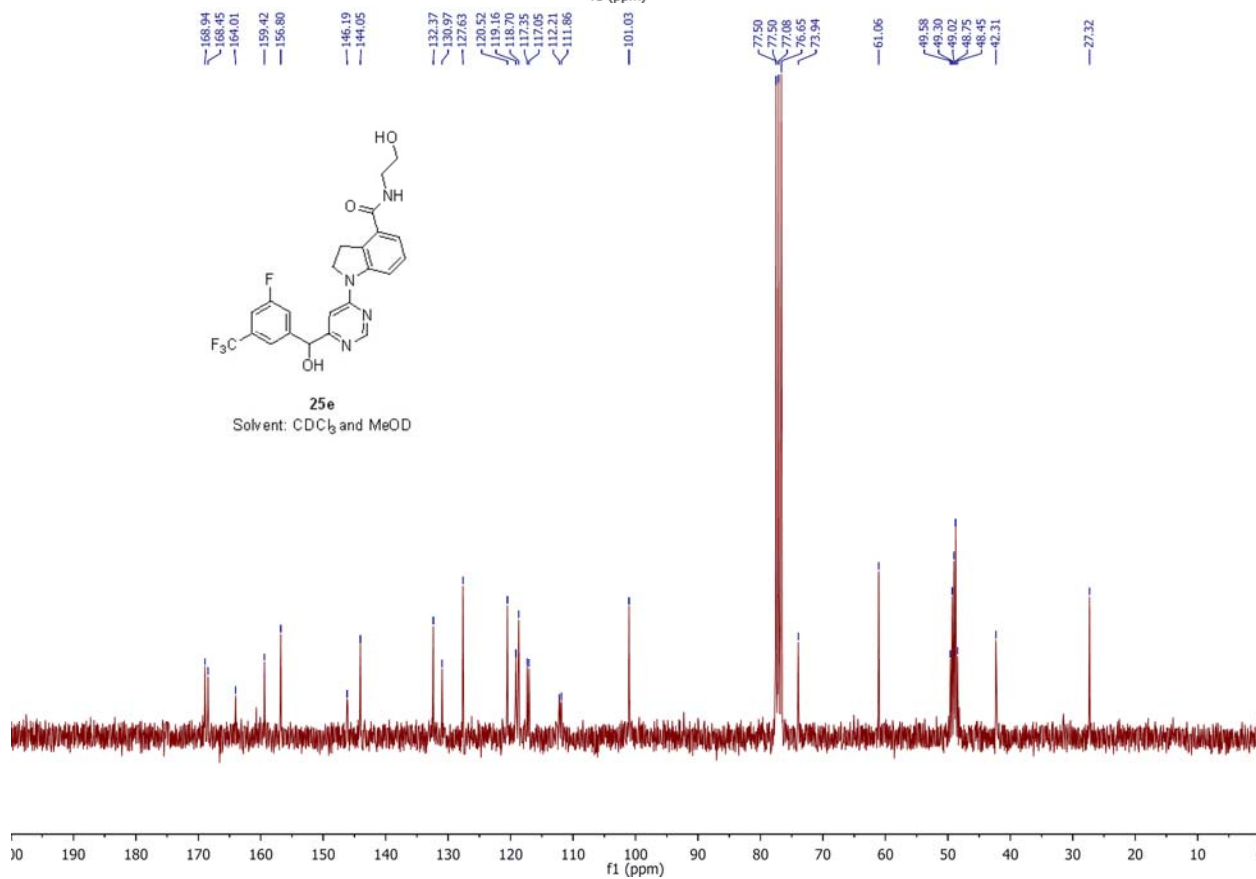

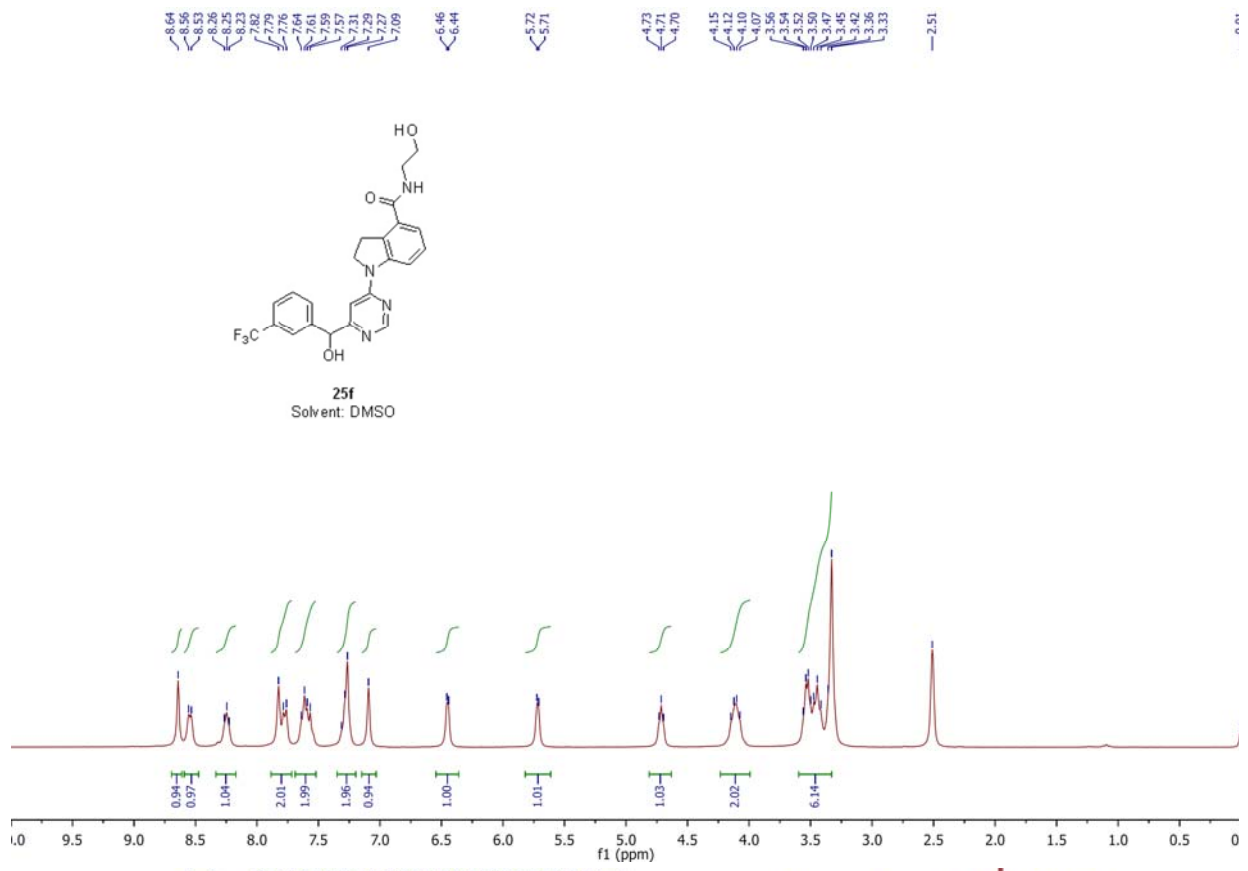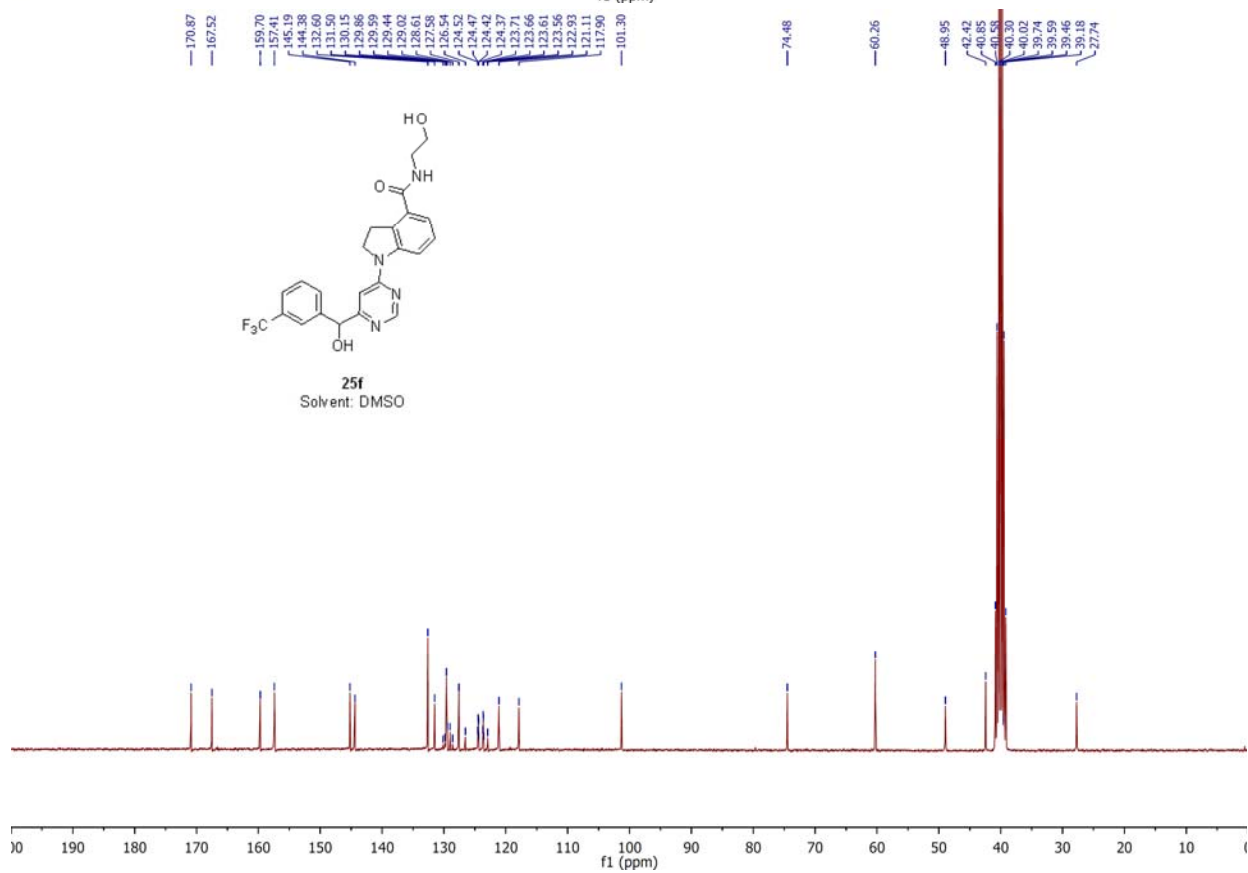

8.54, 8.53, 8.28, 8.26, 7.63, 7.59, 7.32, 7.29, 7.28, 7.17, 7.13, 7.03, 7.01, 6.98, 6.43, 6.27, 4.21, 4.20, 4.18, 4.17, 4.16, 4.14, 4.13, 3.77, 3.72, 3.56, 3.55, 3.53, 3.51, 3.41, 3.38, 2.55

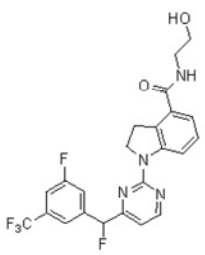

25g  
Solvent: CDCl<sub>3</sub> and MeOD

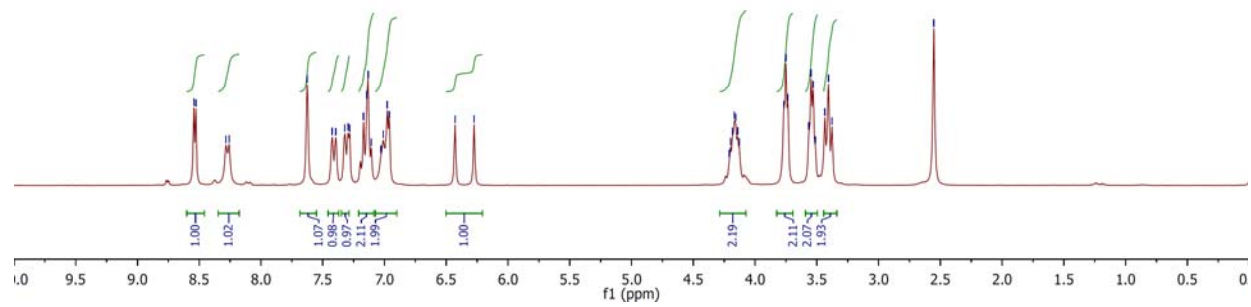

169.16, 169.08, 166.64, 165.94, 164.94, 160.73, 159.01, 158.42, 158.37, 144.25, 141.51, 141.42, 141.32, 133.01, 132.90, 132.69, 132.56, 132.49, 130.99, 130.96, 127.62, 127.47, 124.78, 121.20, 119.94, 119.62, 118.92, 118.87, 117.55, 116.95, 116.85, 116.65, 116.55, 116.01, 113.01, 110.02, 106.50, 106.41, 93.14, 90.76, 61.46, 49.93, 49.65, 49.36, 48.80, 47.26, 42.26, 27.17

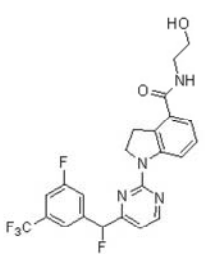

25g  
Solvent: CDCl<sub>3</sub> and MeOD

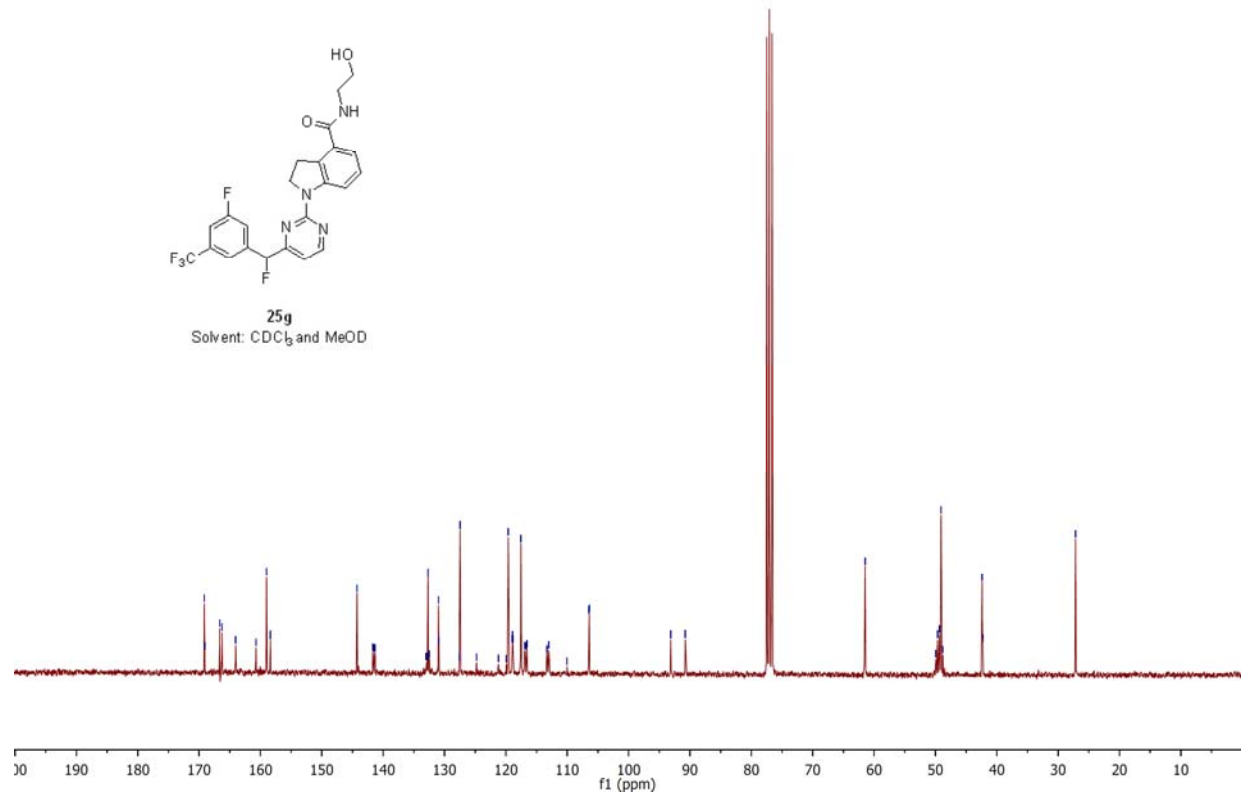



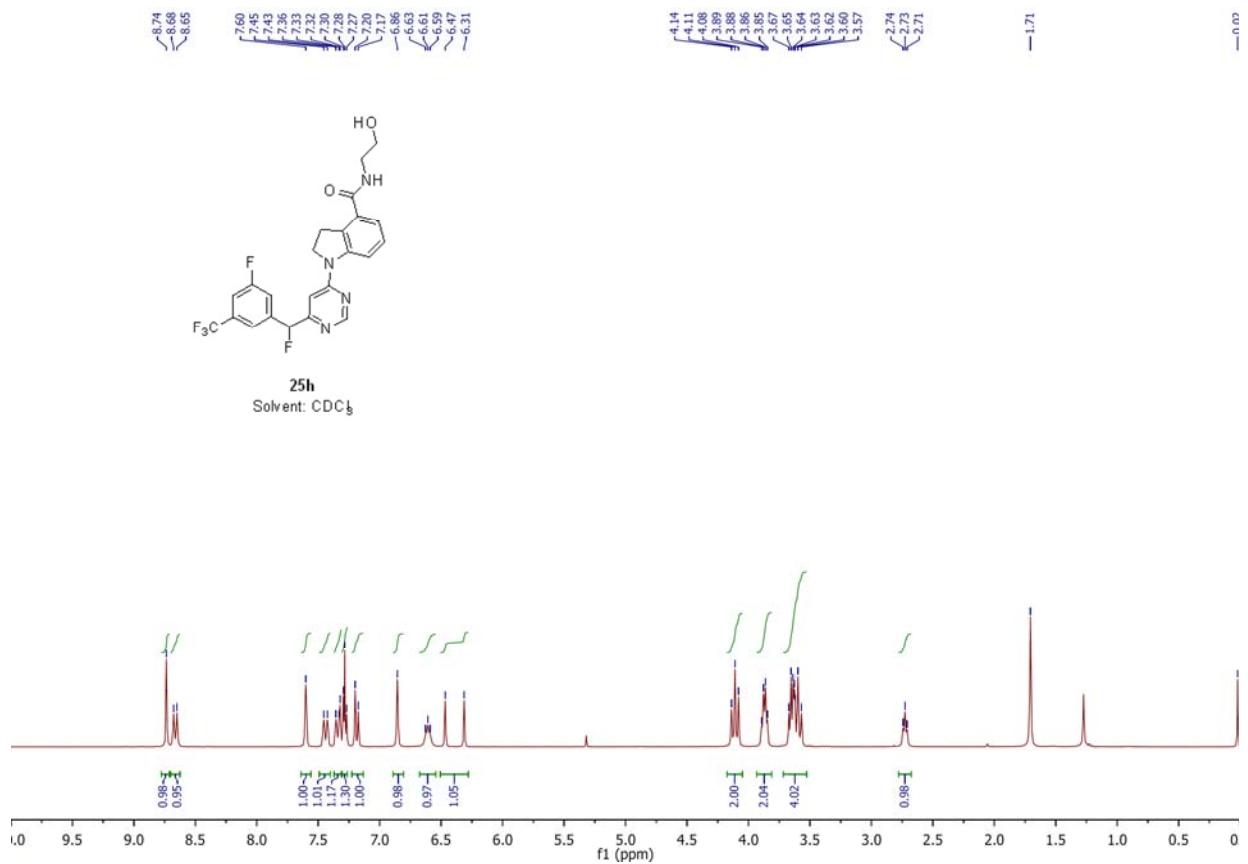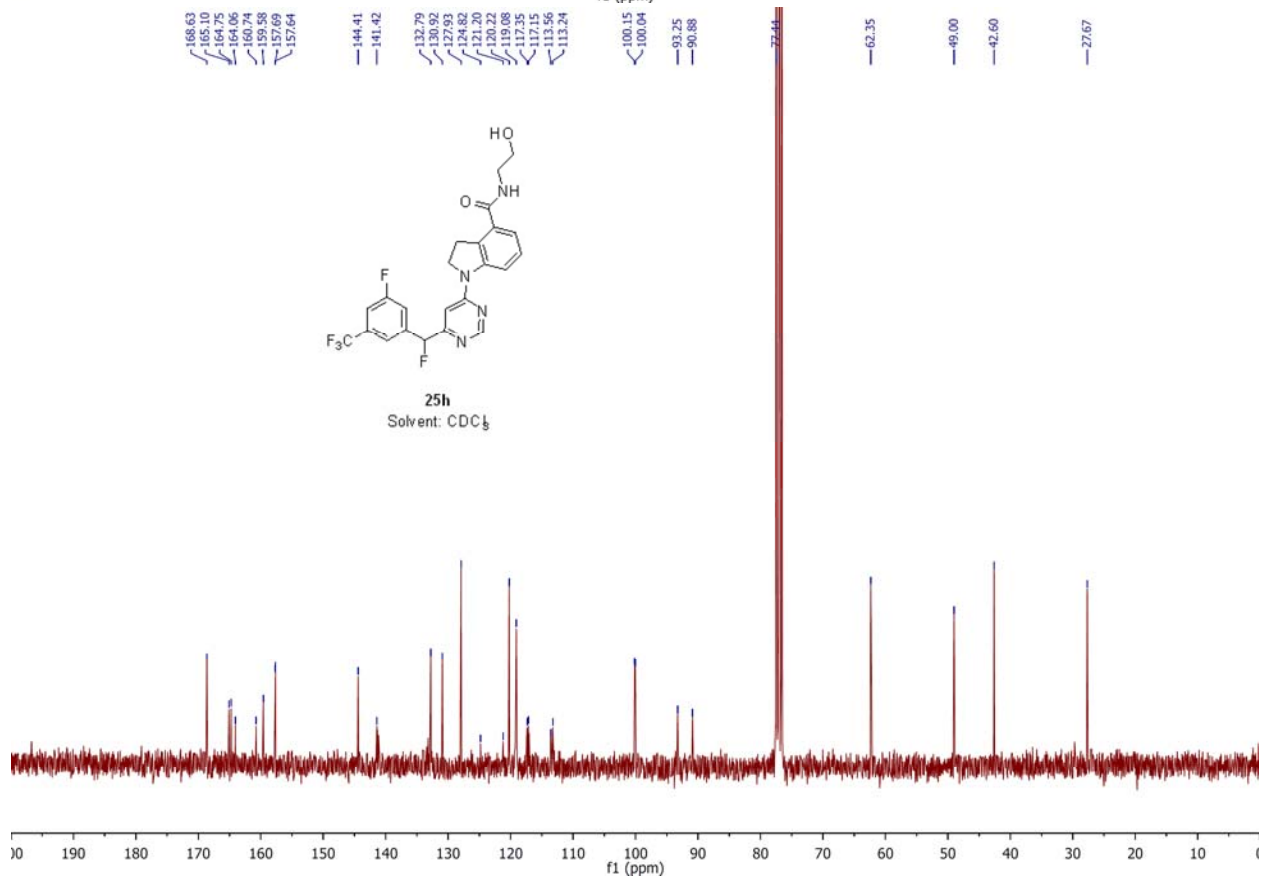

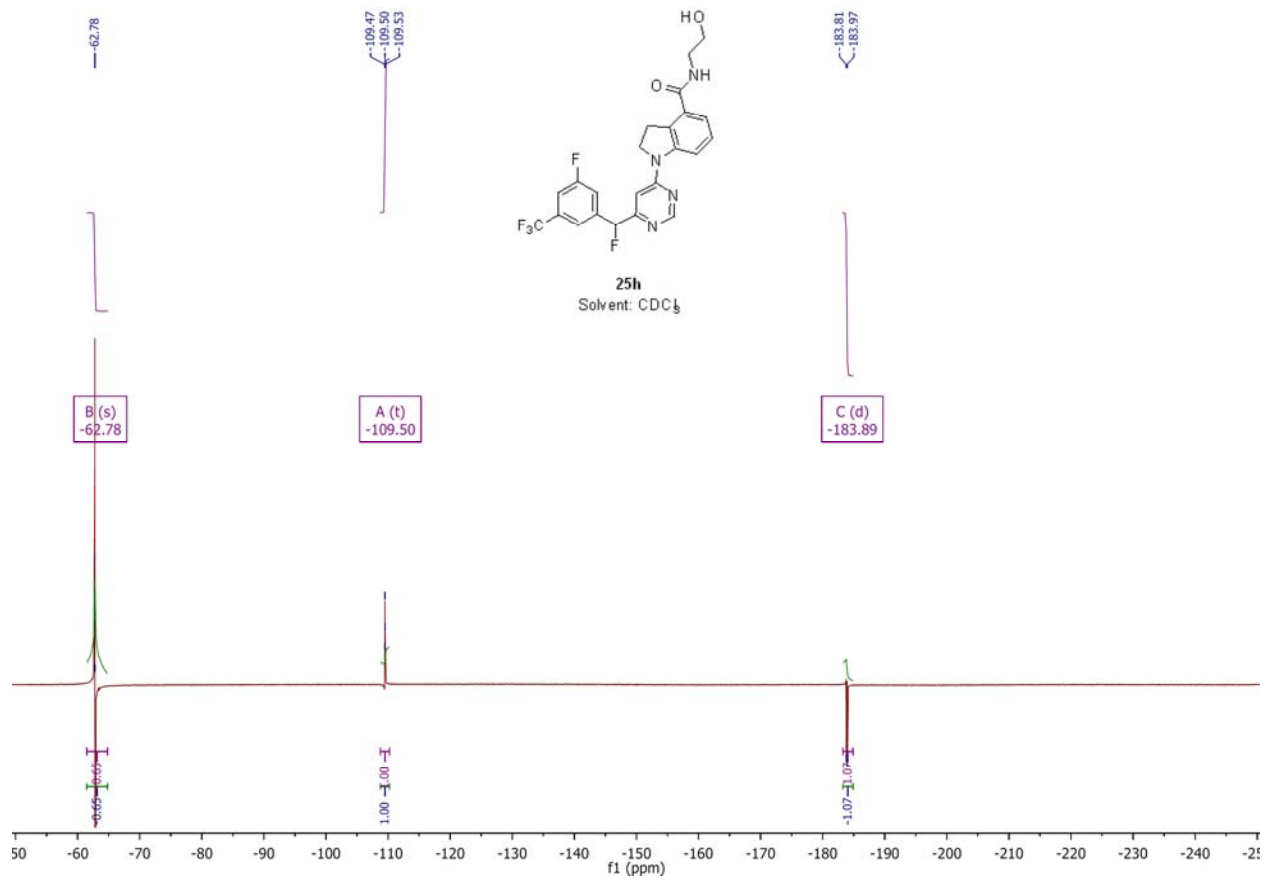

8.62  
8.60  
8.57  
8.55  
8.53  
7.77  
7.76  
7.64  
7.62  
7.59  
7.58  
7.53  
7.51  
7.48  
7.21  
7.18  
7.17  
7.14  
6.81  
6.79  
6.43  
6.42  
6.28  
6.26

4.04  
4.01  
3.99  
3.97  
3.75  
3.74  
3.72  
3.54  
3.53  
3.49  
3.46  
3.44  
3.00

1.23

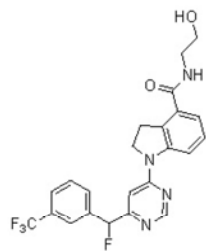

**25i**  
Solvent: CDCl<sub>3</sub> and MeOD

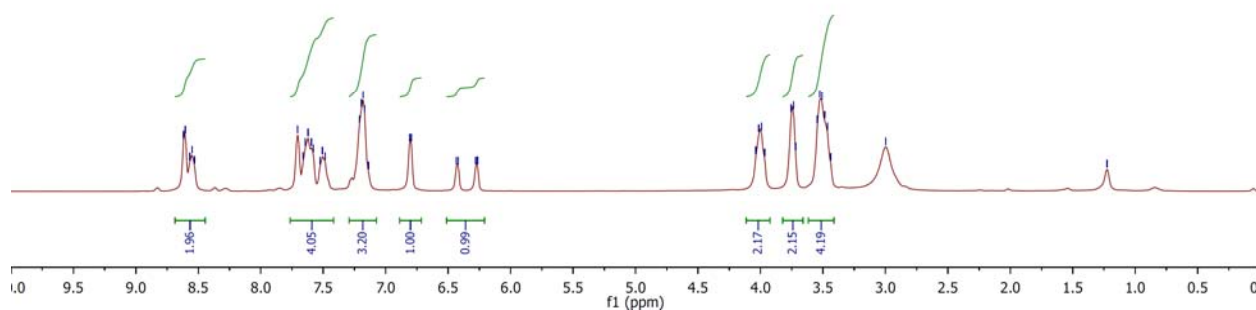

168.83  
165.43  
165.08  
159.46  
157.41  
144.14  
138.49  
138.22  
132.51  
131.24  
131.06  
130.80  
130.29  
130.21  
129.70  
127.74  
125.89  
123.51  
120.54  
118.87  
100.28  
100.17  
83.84  
91.48  
77.51  
77.08  
76.66  
61.29  
49.54  
49.25  
48.89  
42.38  
27.46

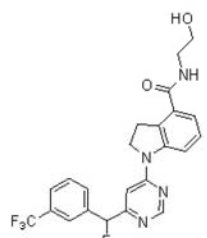

**25i**  
Solvent: CDCl<sub>3</sub> and MeOD

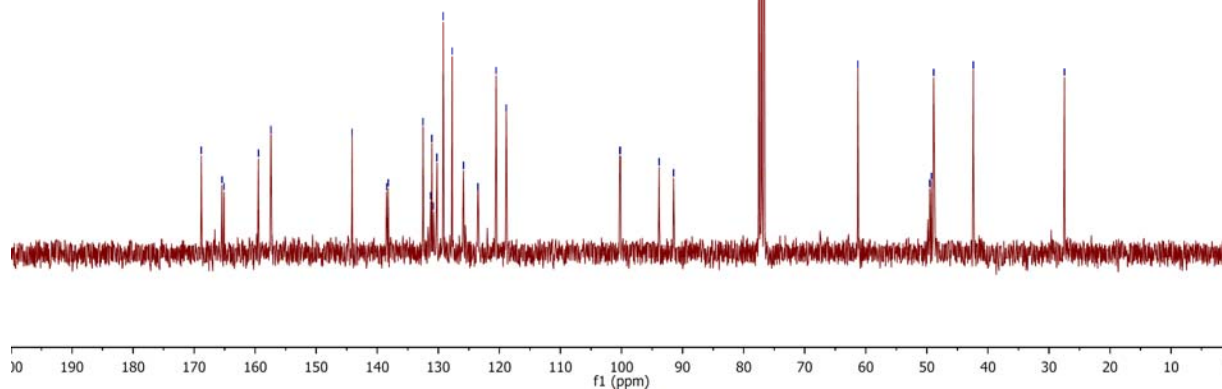

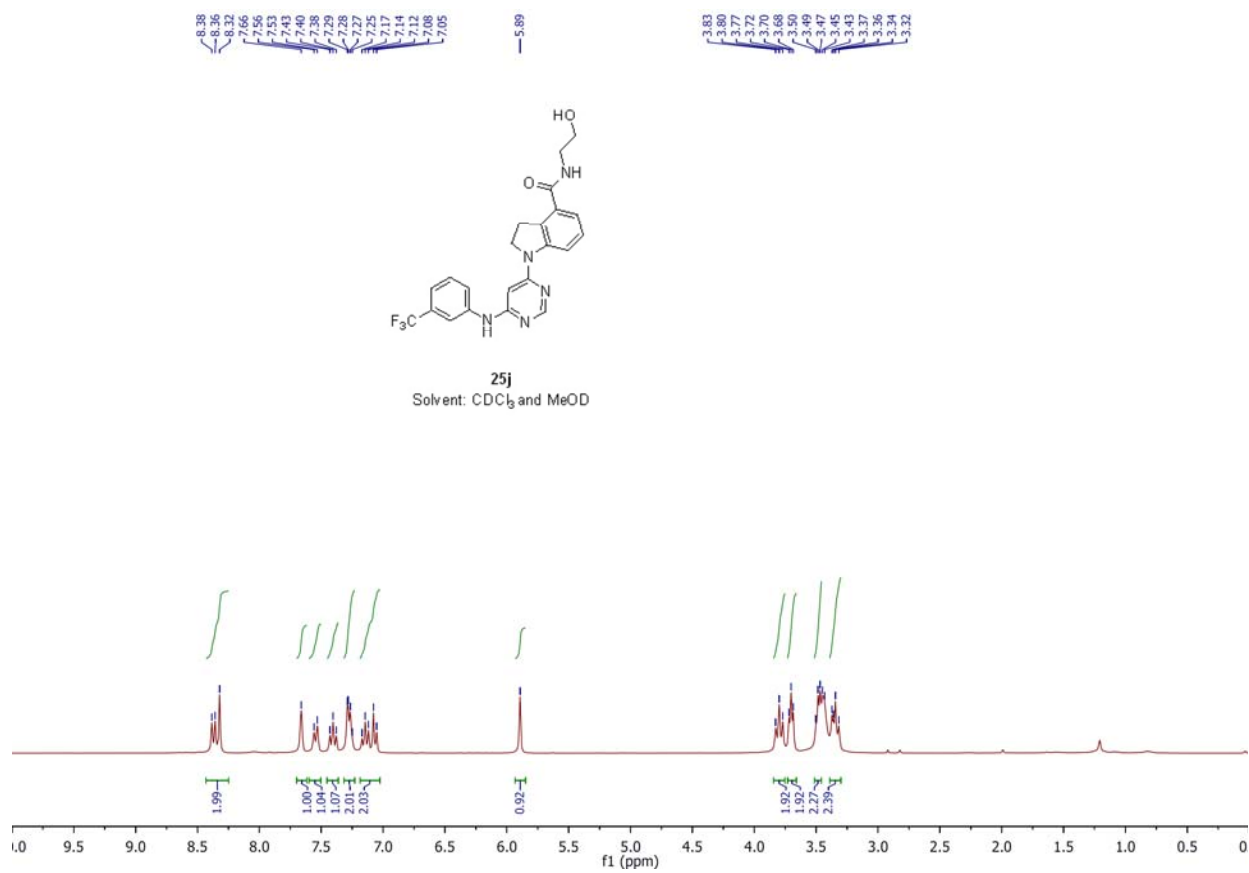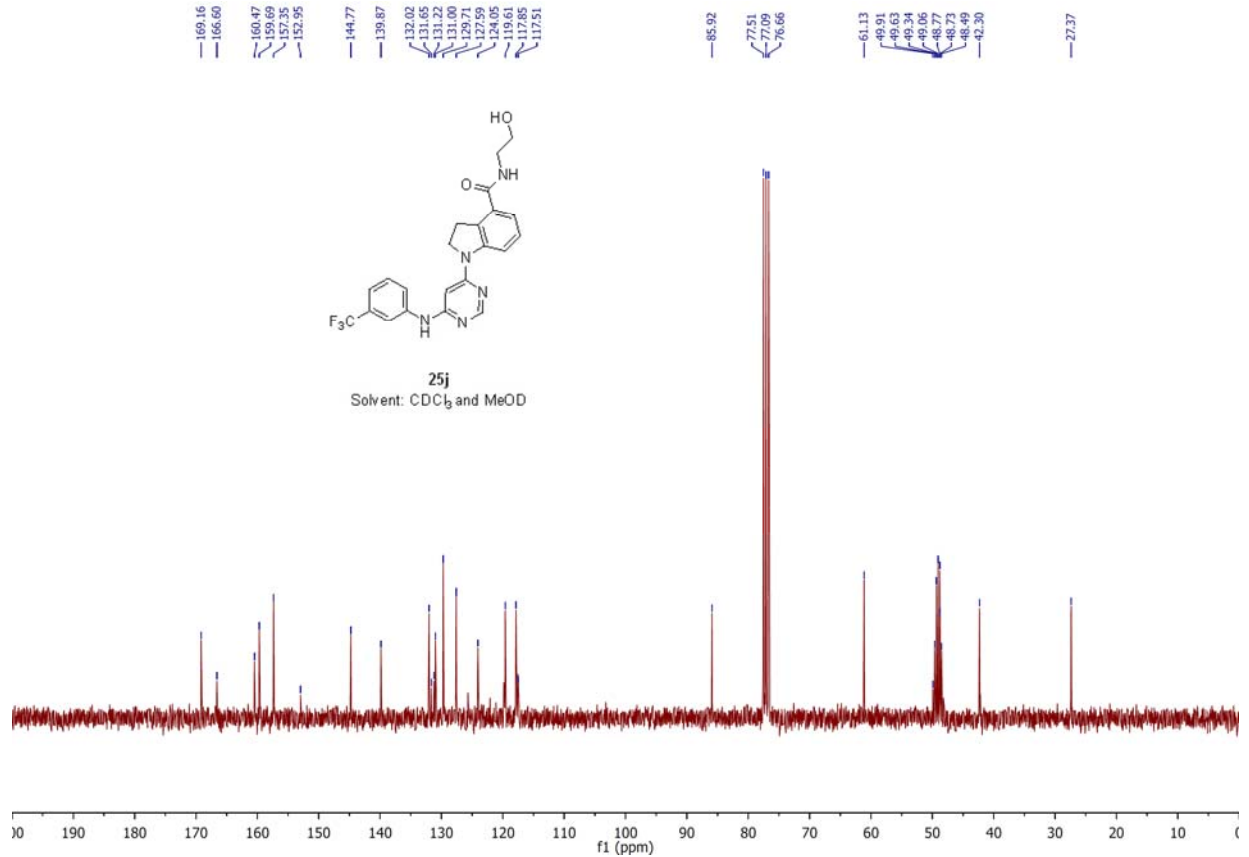

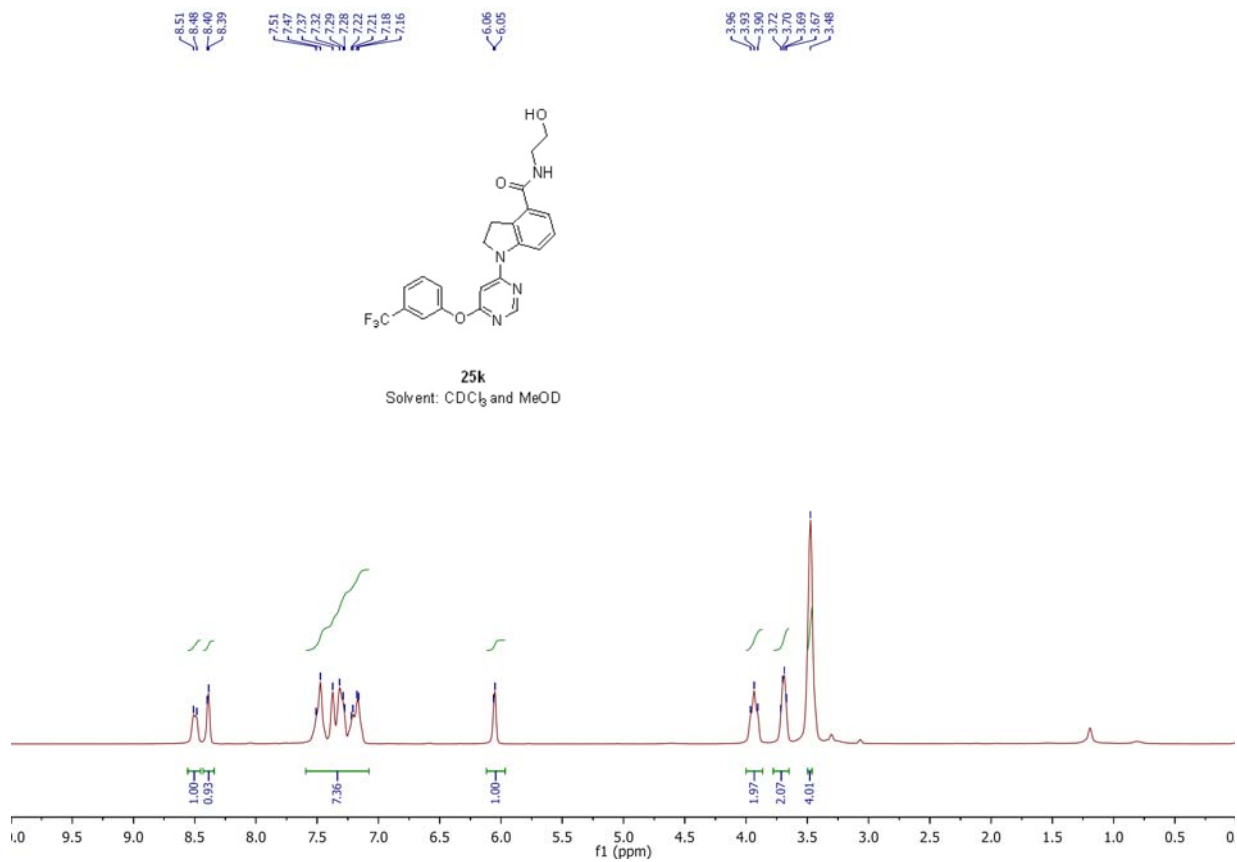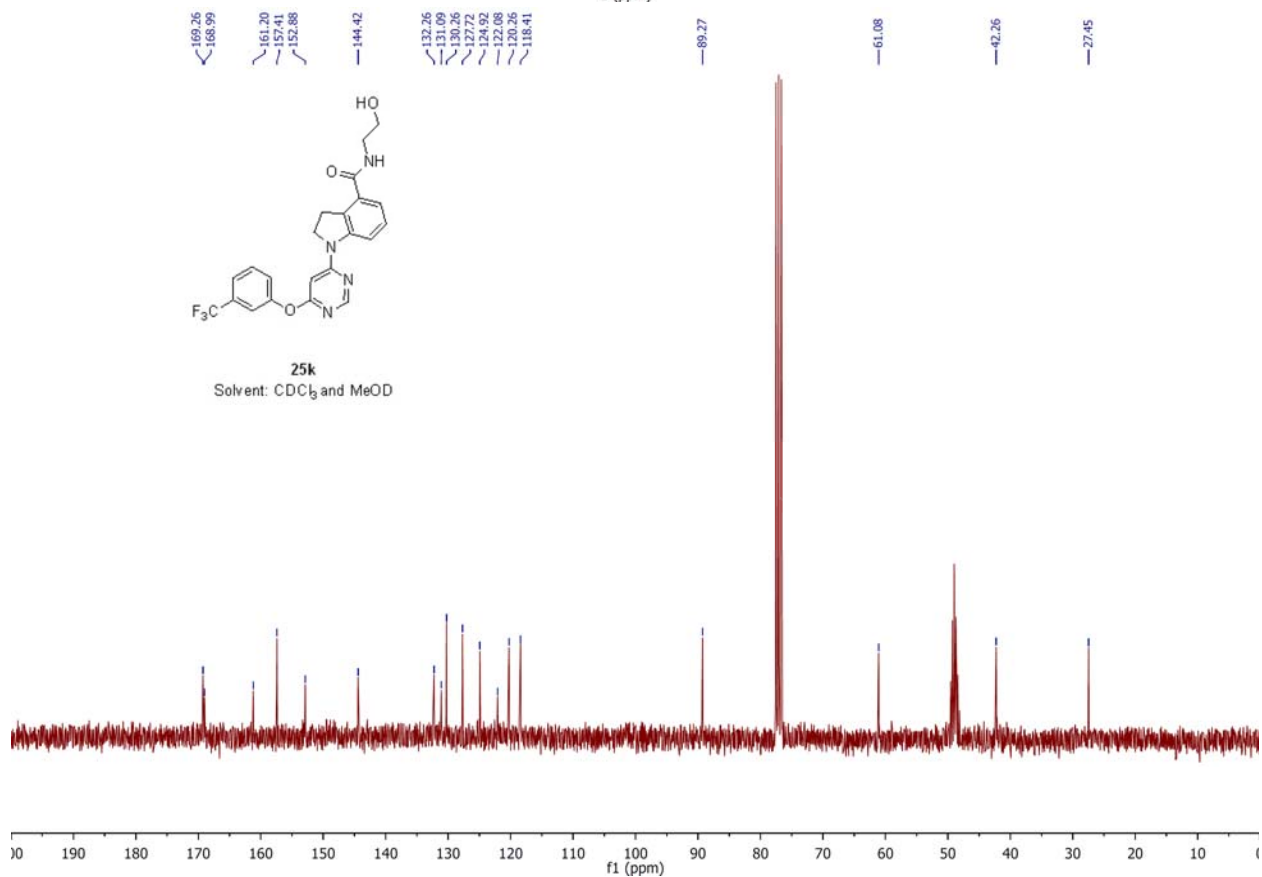

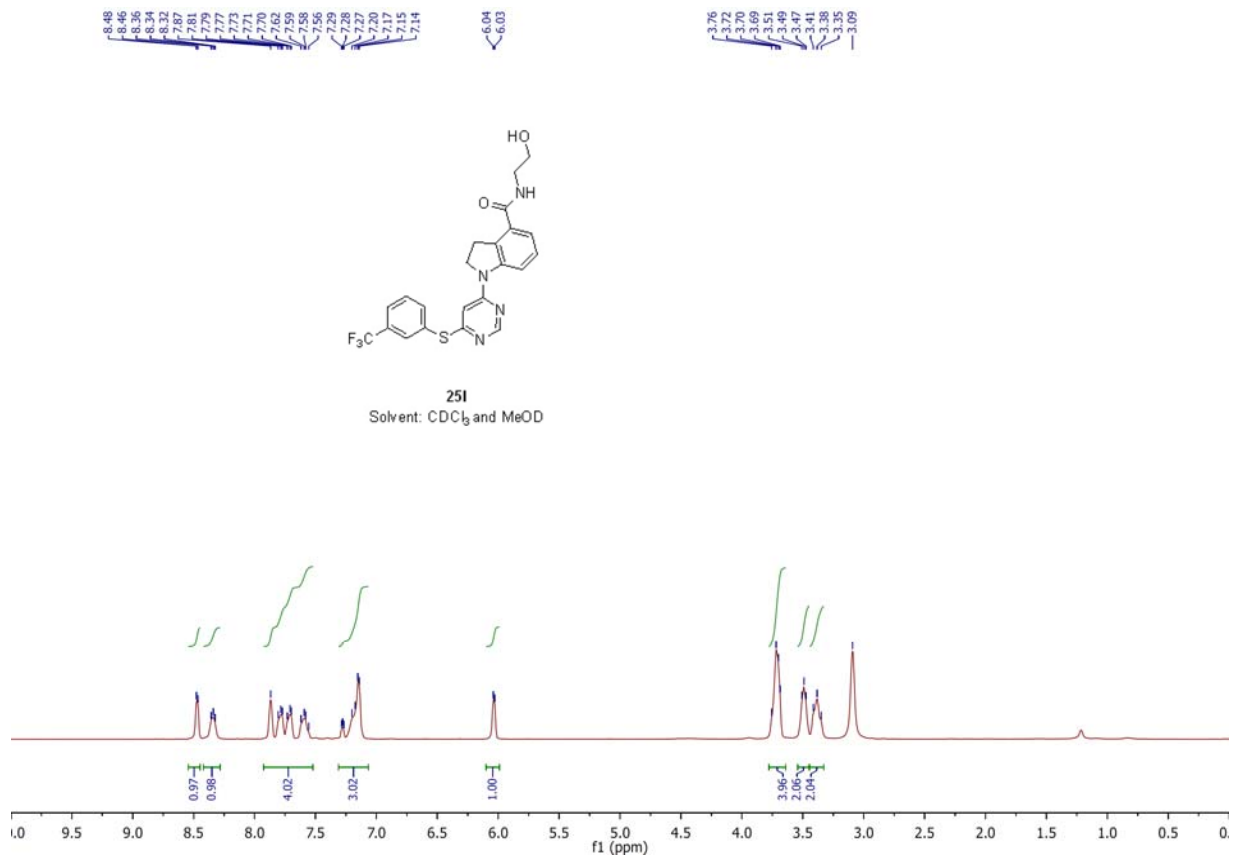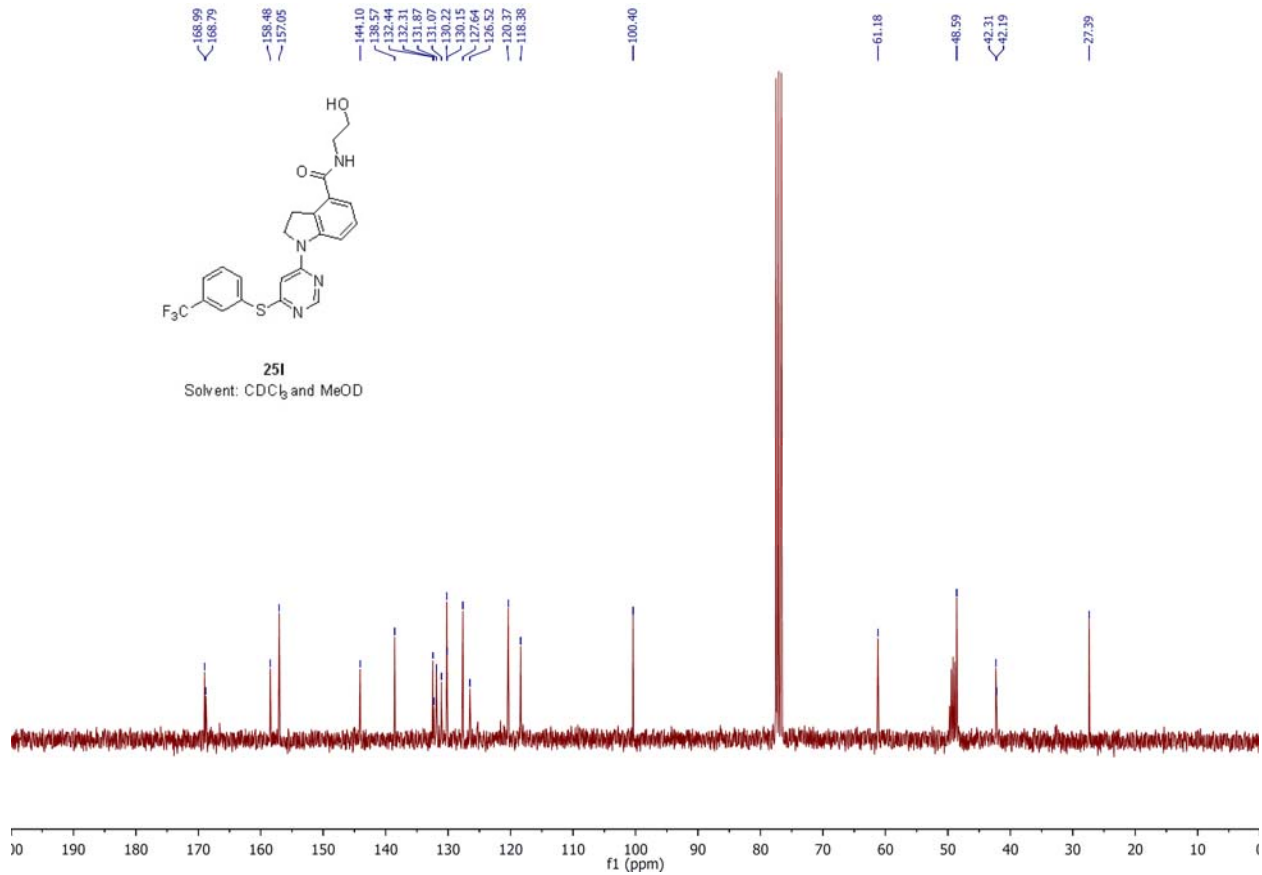

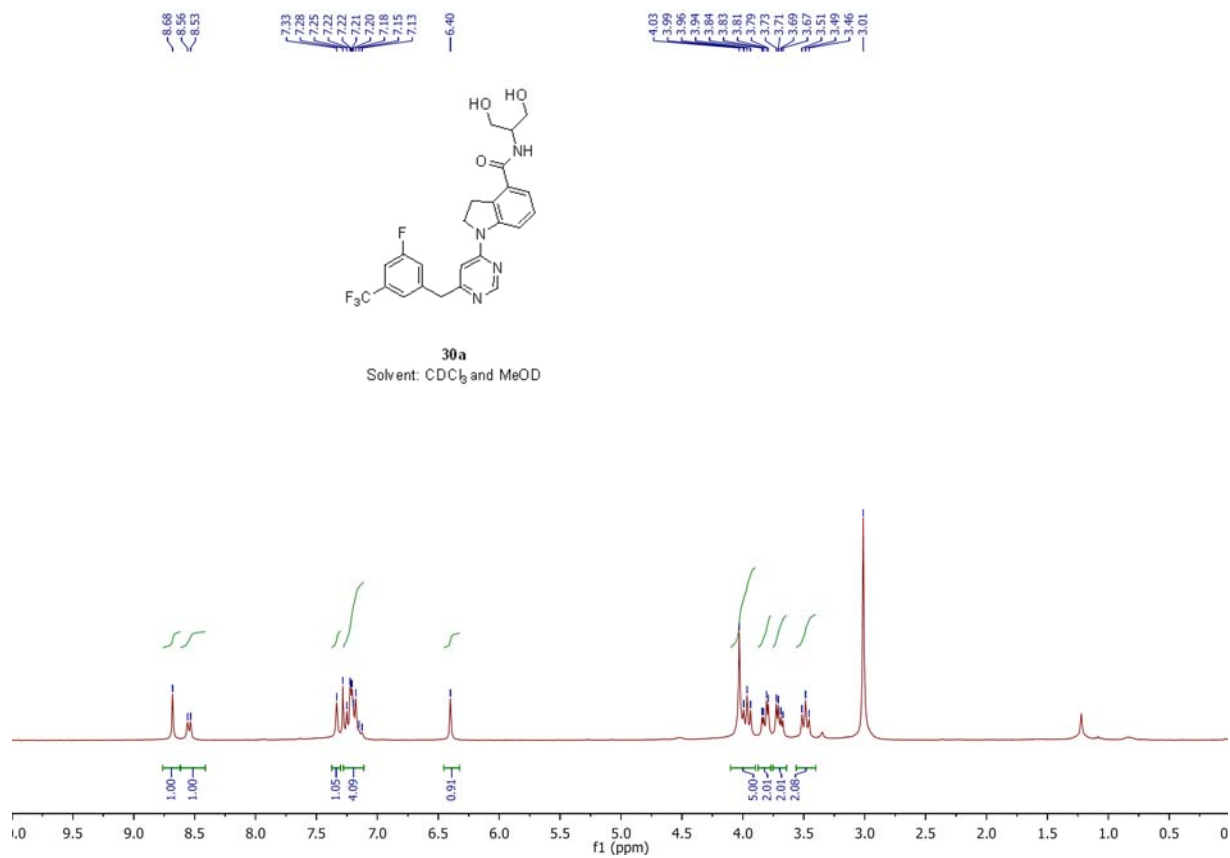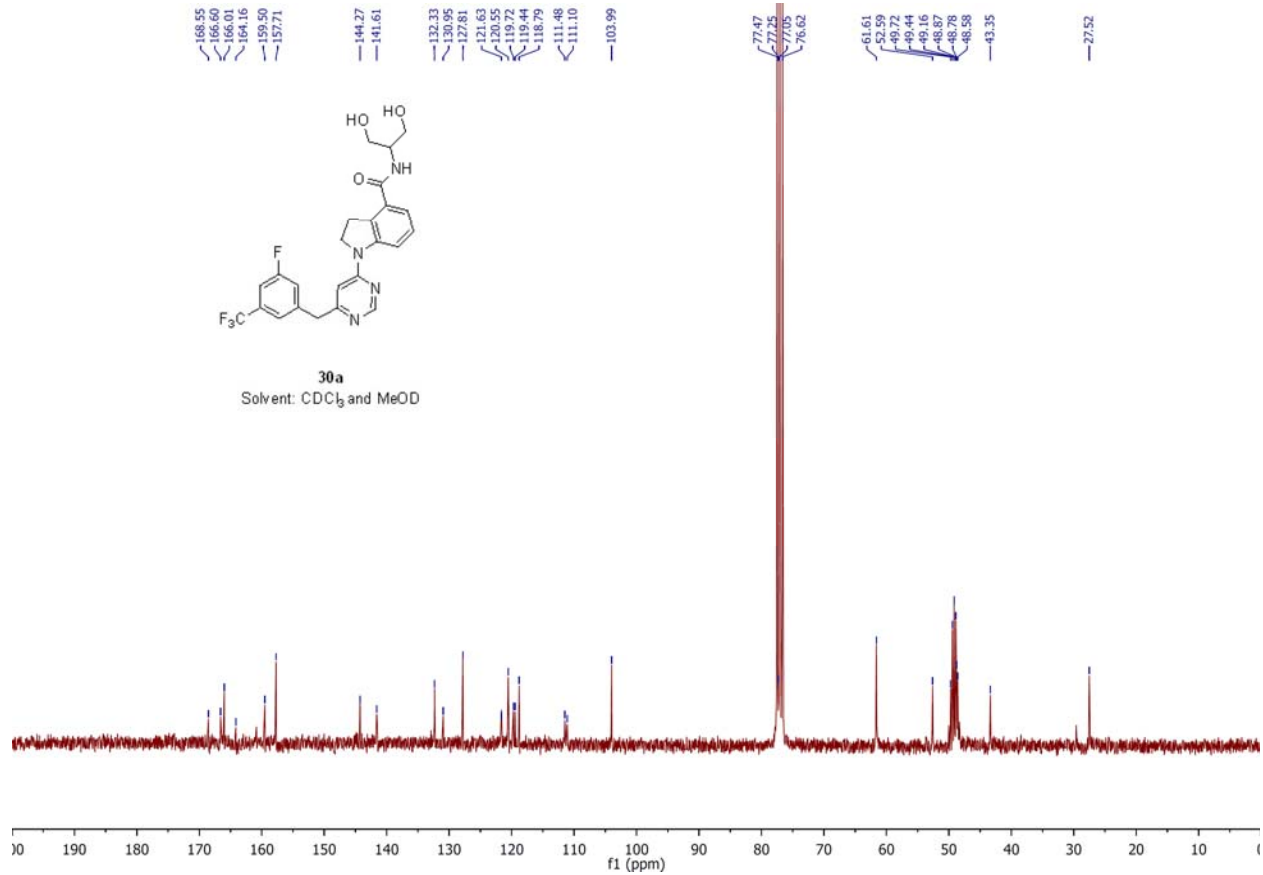

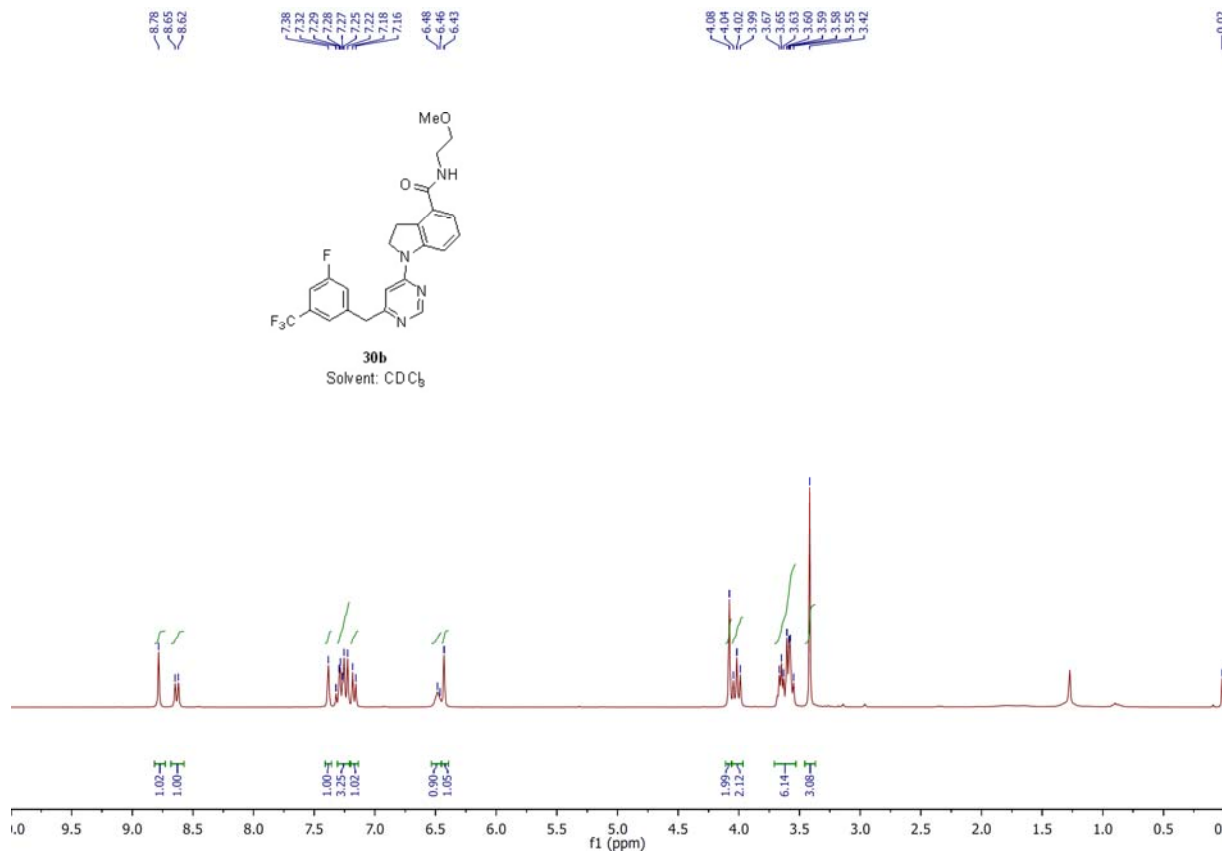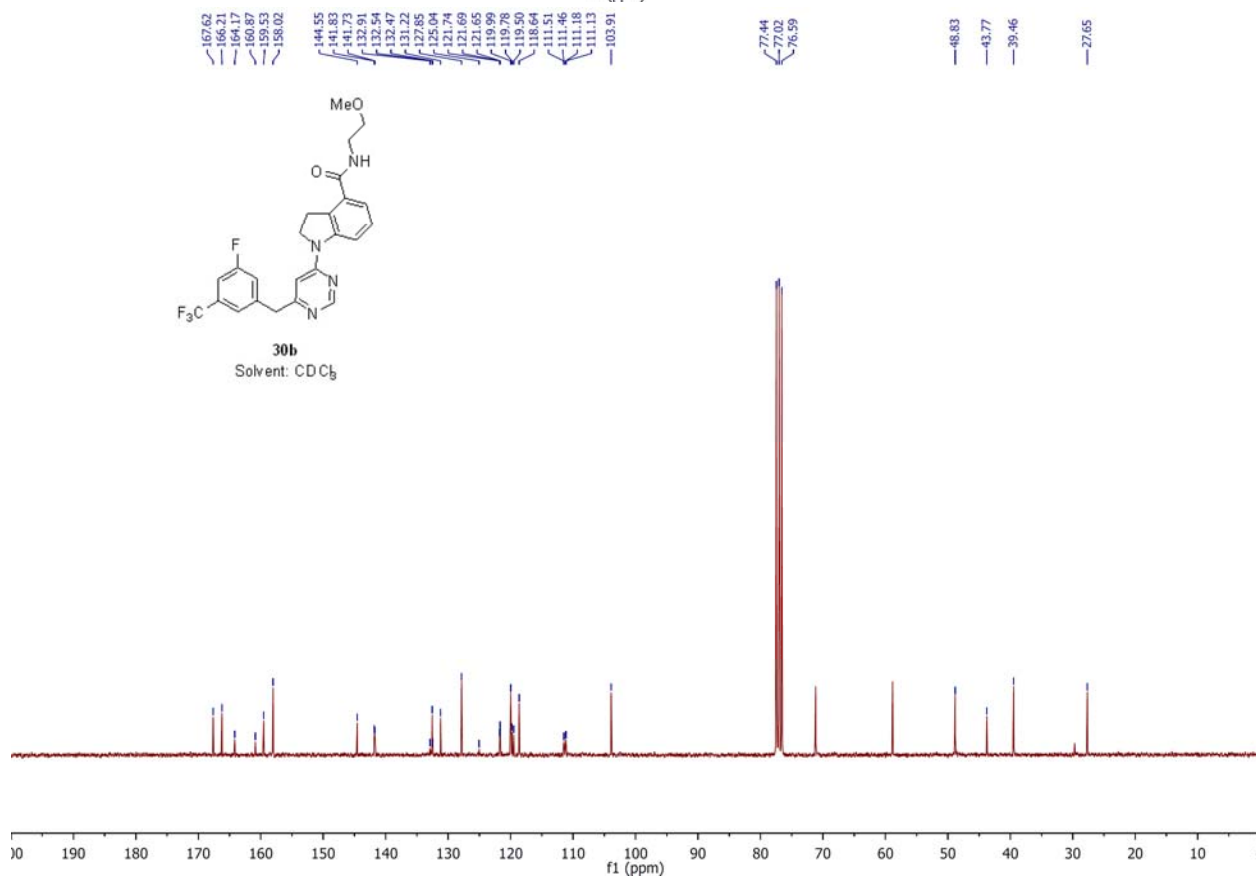



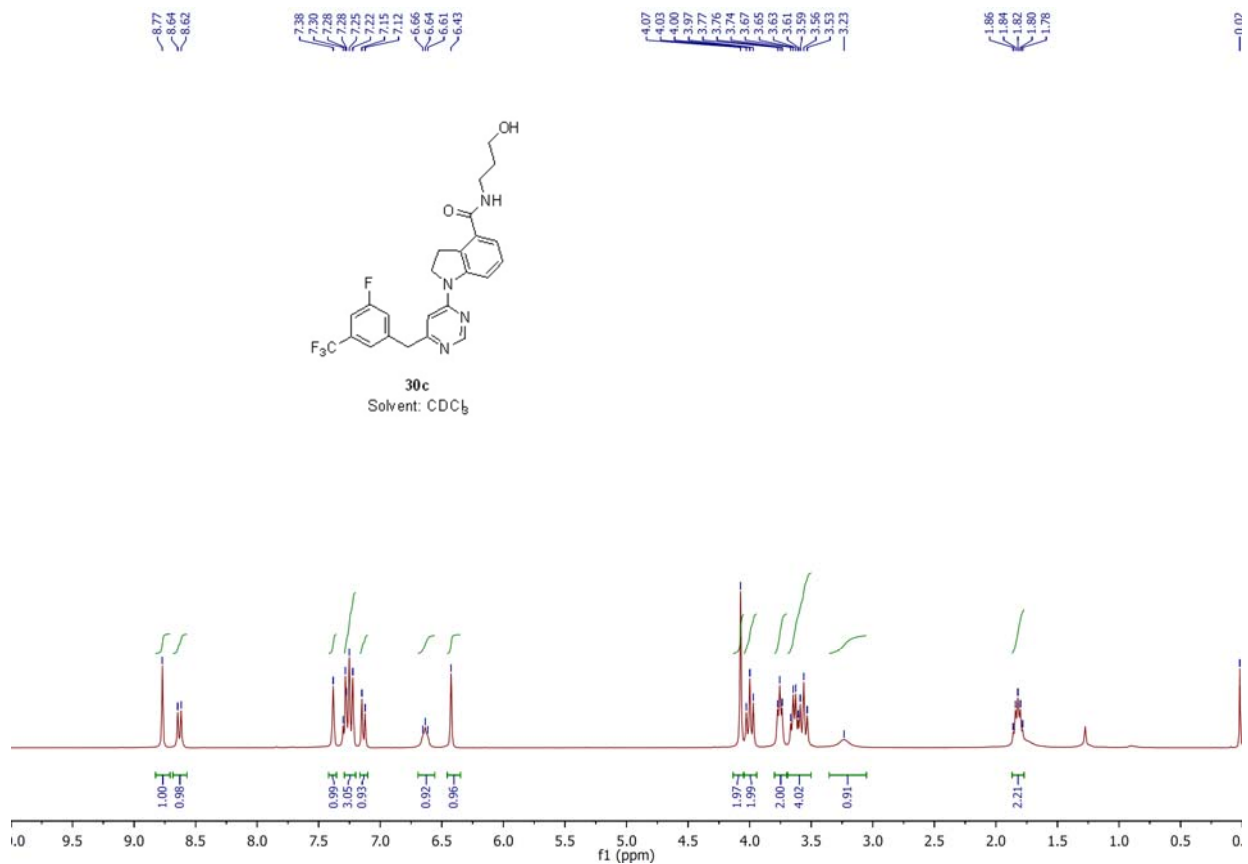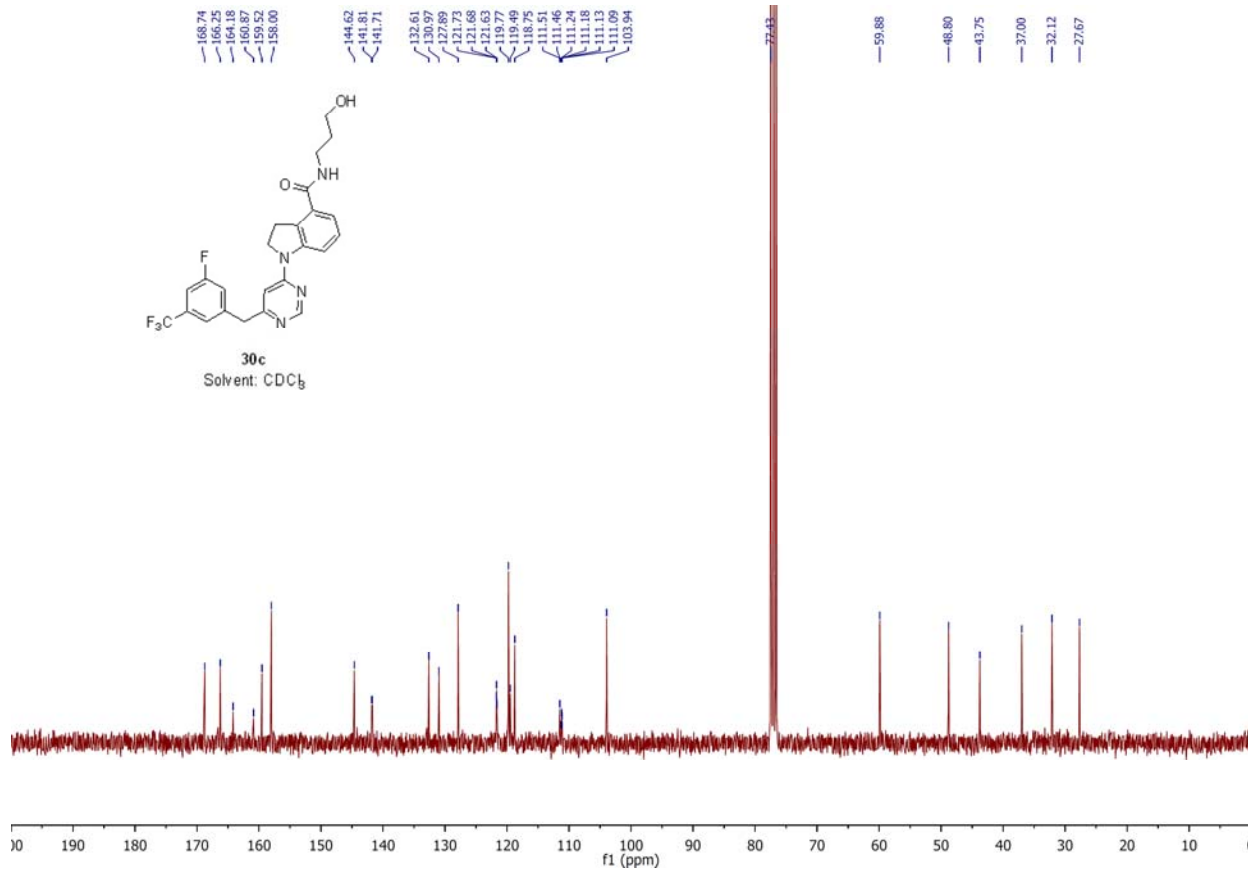

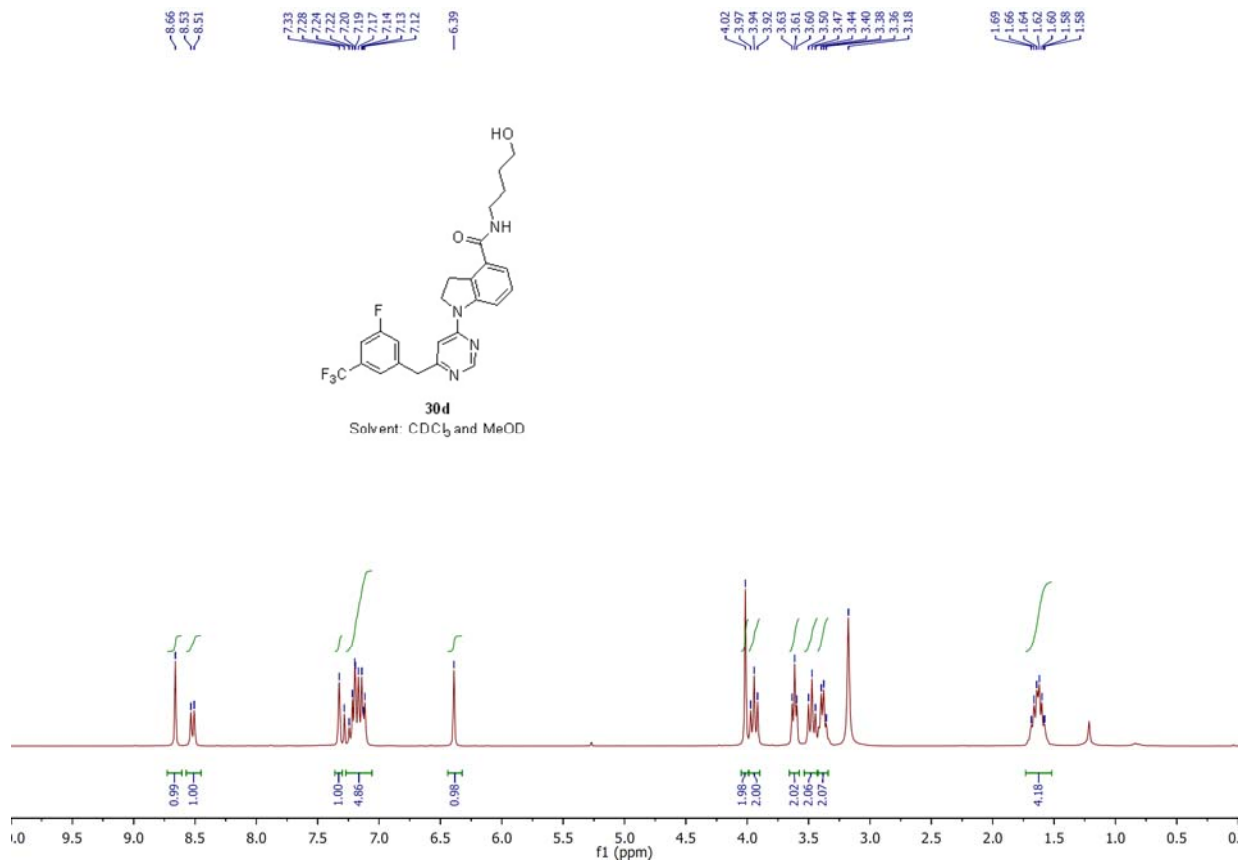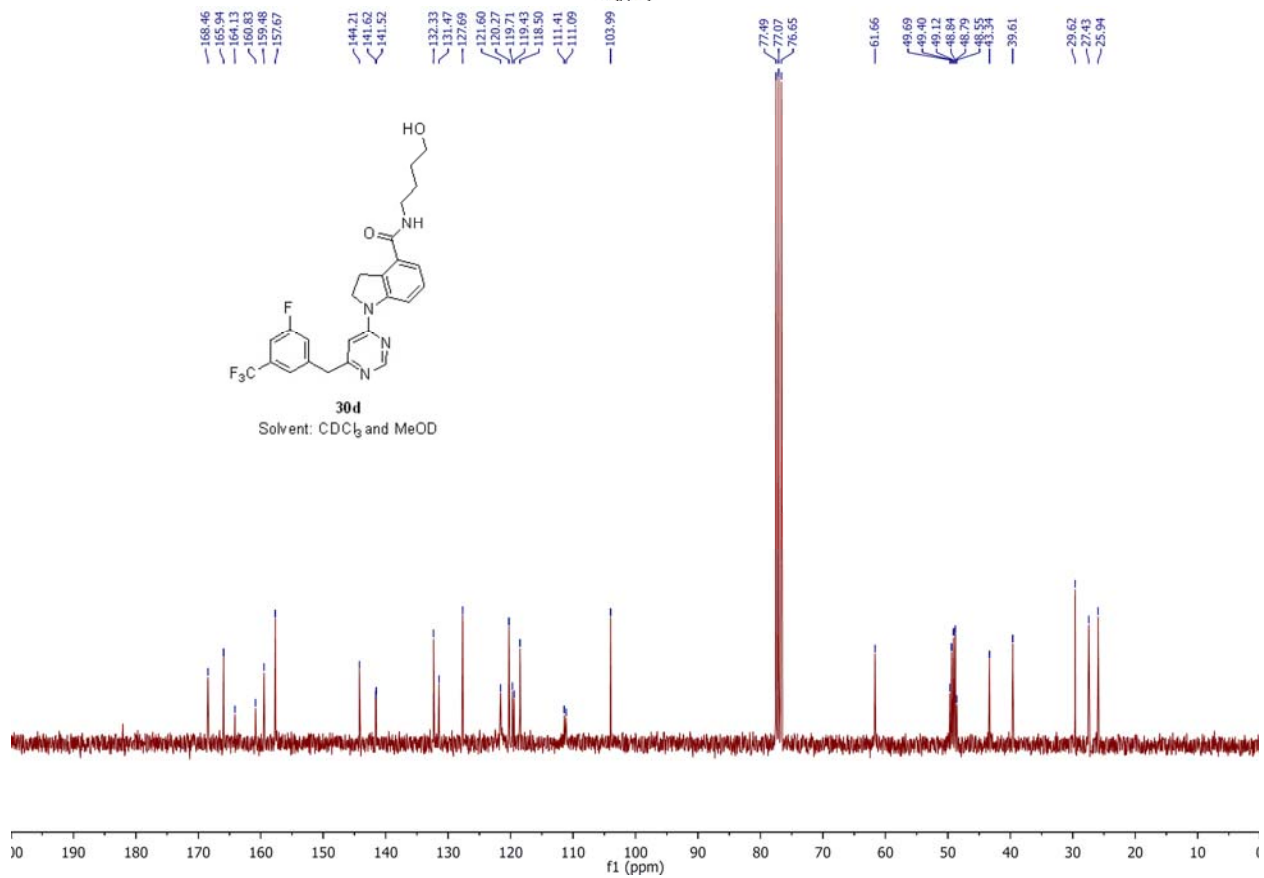

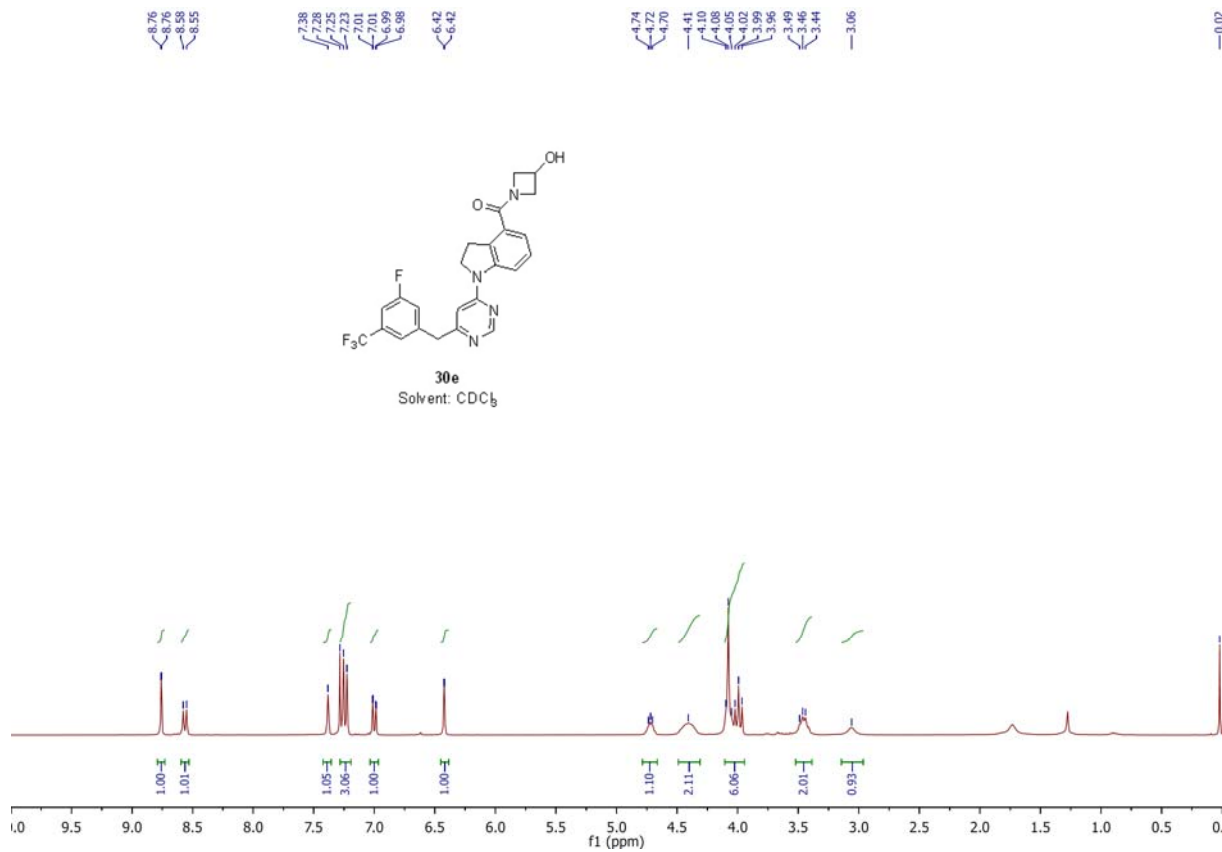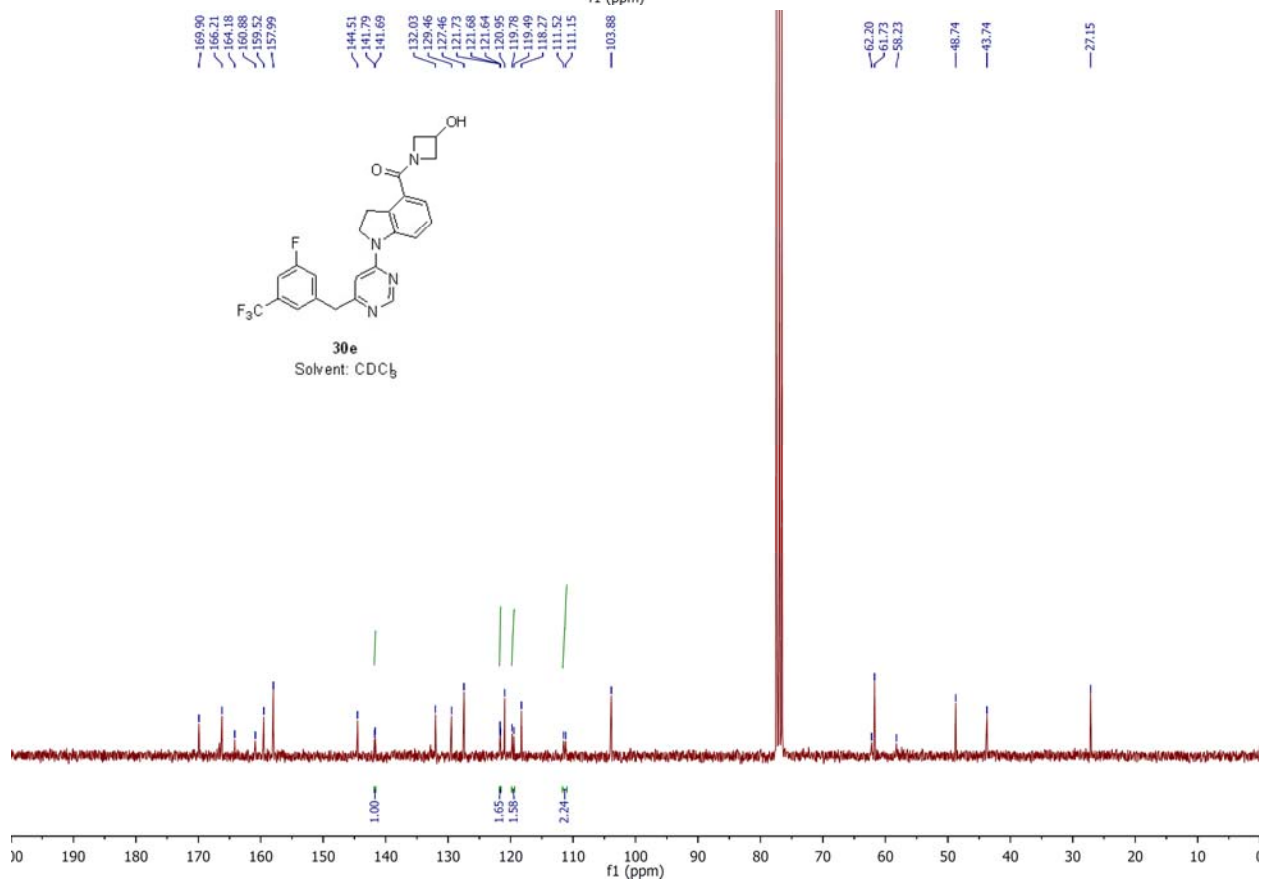

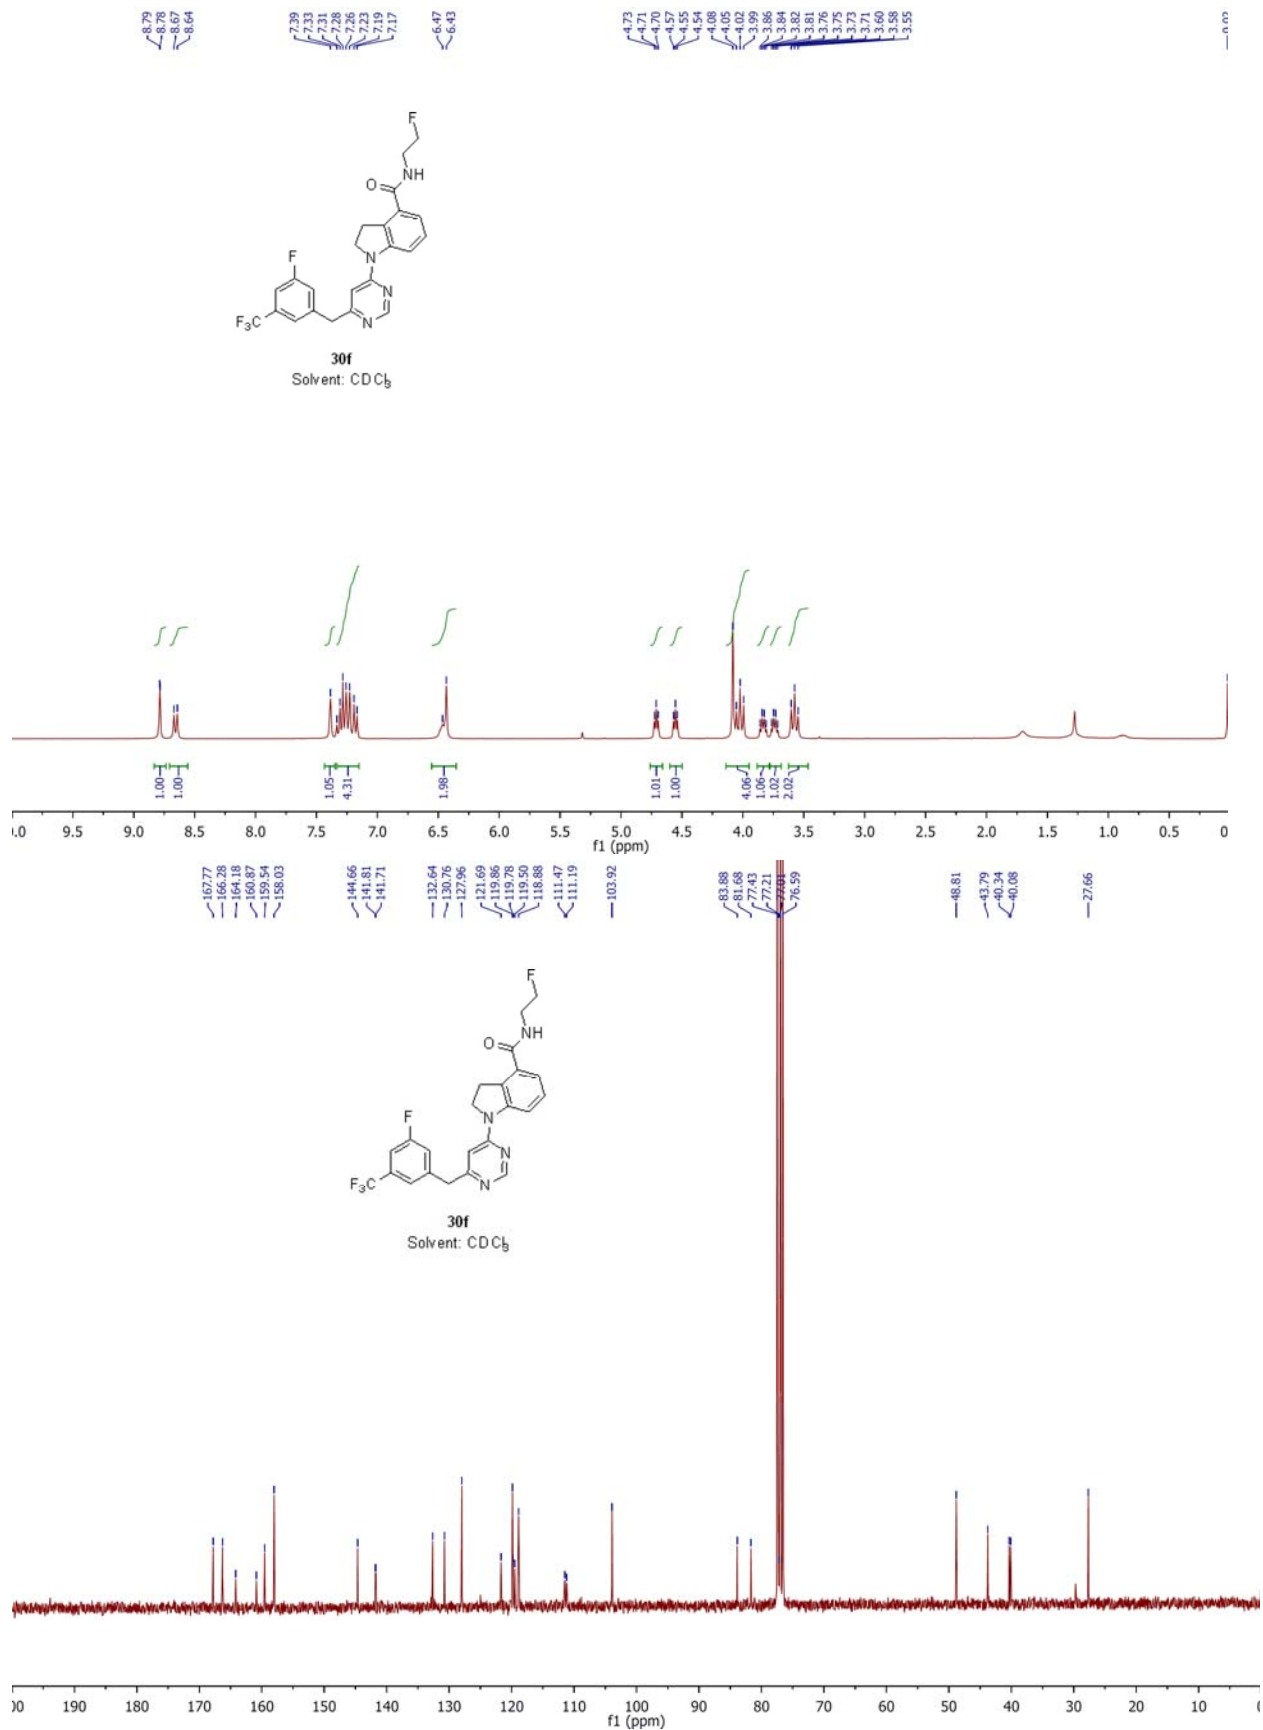

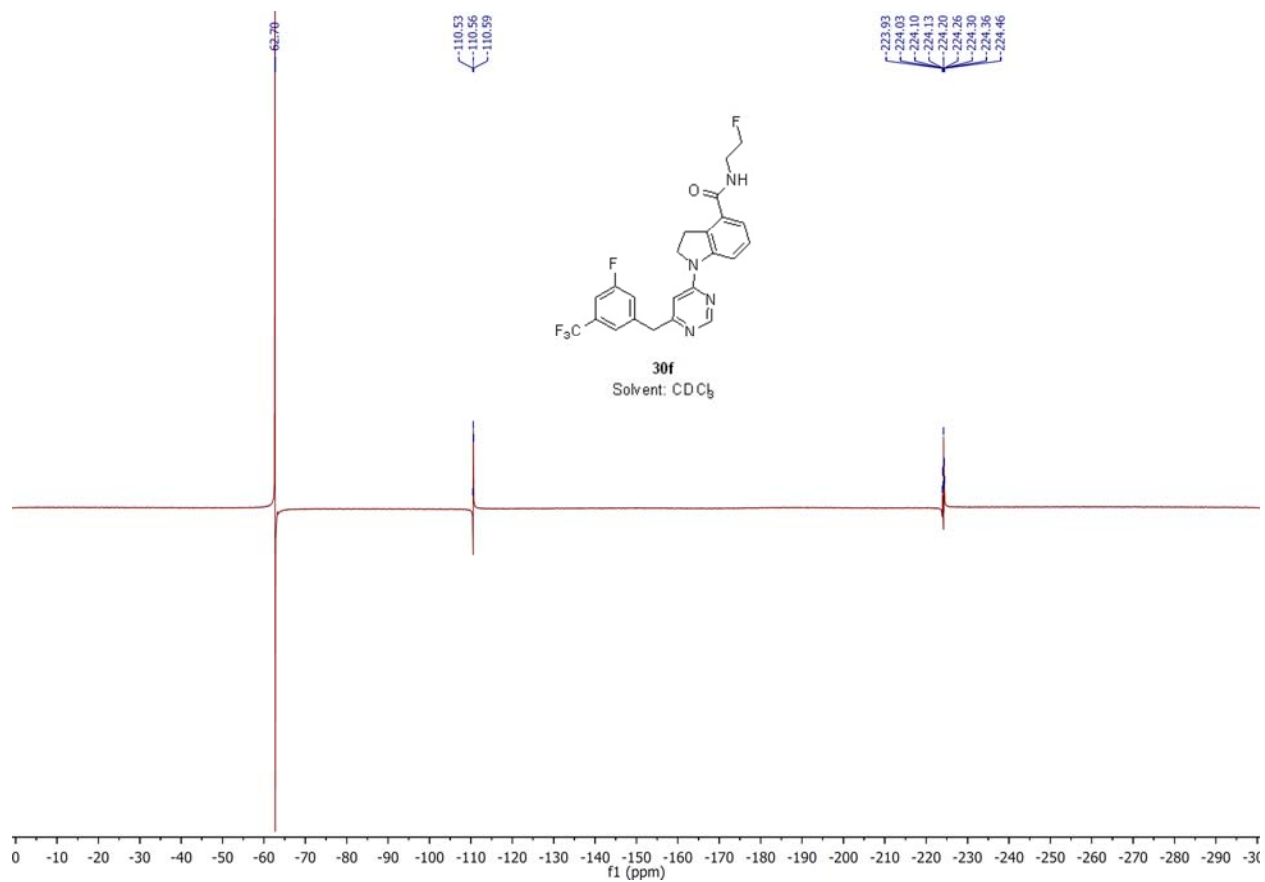

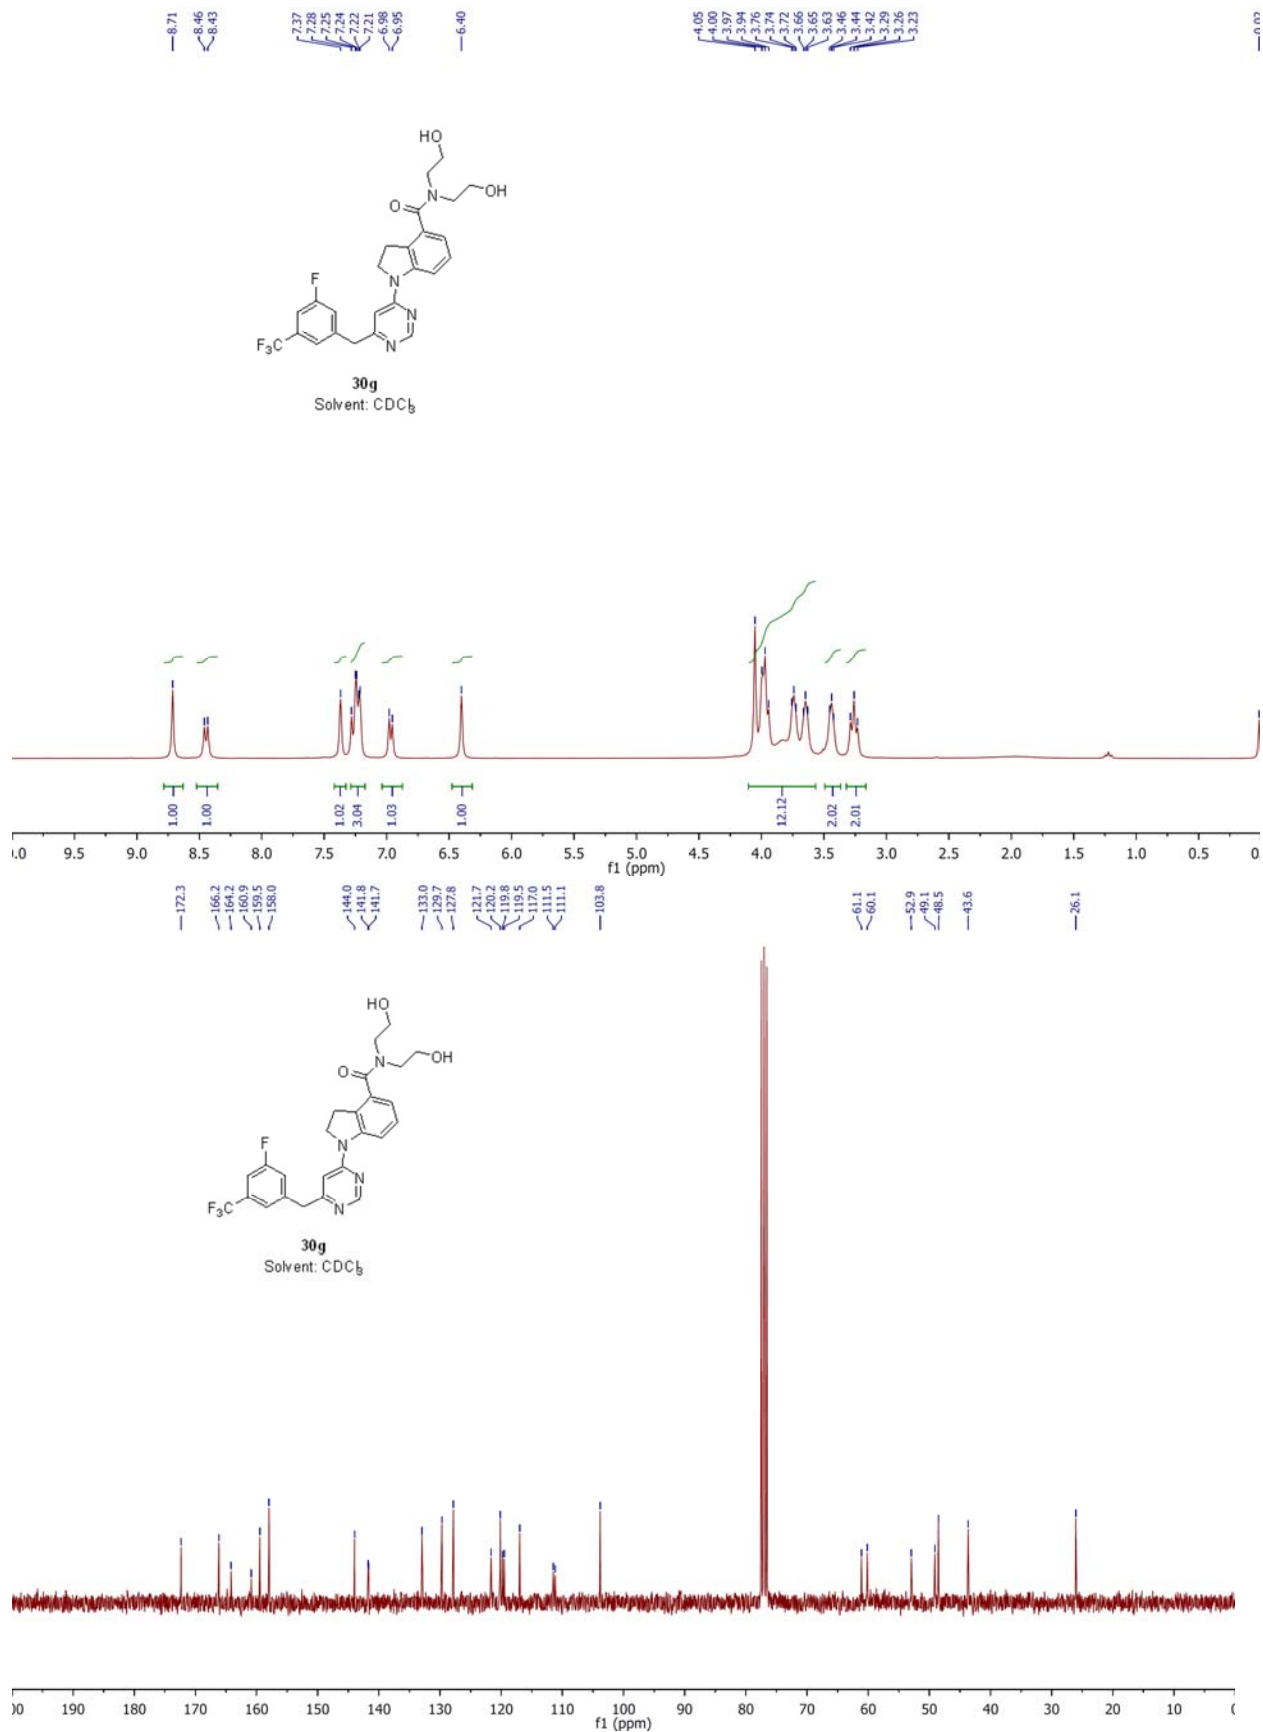

Supplement: NIHMS1736871-supplement-JMC_Supporting_Info.pdf [file NIHMS1736871-supplement-JMC_Supporting_Info.pdf]
